# Supplementary material for: ‘Pincer’ dicarbene complexes of some early transition metals and uranium
Source: Royal Society of Chemistry journal article supplement (doi:10.1039/b512133g), 2005-11-08

Electronic Supplementary Information for Dalton Transactions  
This journal is © The Royal Society of Chemistry 2005

**‘Pincer’ dicarbene complexes of some early transition metals and uranium**

**David Pugh, Joseph A. Wright, Sandra Freeman and Andreas A. Danopoulos\***

**Electronic Supplementary Information**

### Structural Data for 1a

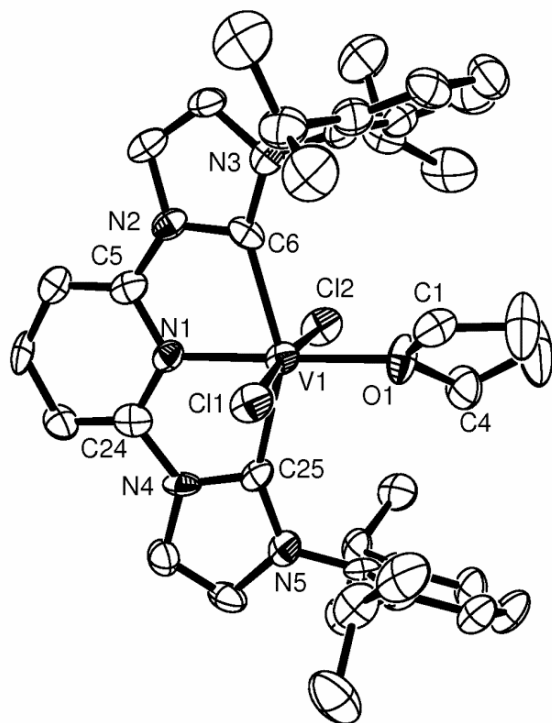

Electronic Supplementary Information for Dalton Transactions  
This journal is © The Royal Society of Chemistry 2005

Table 1. Crystal data and structure refinement for 1a.

|                                   |                                                                                 |          |
|-----------------------------------|---------------------------------------------------------------------------------|----------|
| Identification code               | 1a                                                                              |          |
| Empirical formula                 | C <sub>47</sub> H <sub>65</sub> Cl <sub>2</sub> N <sub>5</sub> O <sub>3</sub> V |          |
| Formula weight                    | 869.88                                                                          |          |
| Temperature                       | 120(2) K                                                                        |          |
| Wavelength                        | 0.71073 Å                                                                       |          |
| Crystal system                    | Orthorhombic                                                                    |          |
| Space group                       | P n a 21                                                                        |          |
| Unit cell dimensions              | a = 10.306(3) Å                                                                 | α = 90°. |
|                                   | b = 32.019(11) Å                                                                | β = 90°. |
|                                   | c = 13.807(5) Å                                                                 | γ = 90°. |
| Volume                            | 4556(3) Å <sup>3</sup>                                                          |          |
| Z                                 | 4                                                                               |          |
| Density (calculated)              | 1.268 Mg/m <sup>3</sup>                                                         |          |
| Absorption coefficient            | 0.380 mm <sup>-1</sup>                                                          |          |
| F(000)                            | 1852                                                                            |          |
| Crystal size                      | 0.22 x 0.10 x 0.02 mm <sup>3</sup>                                              |          |
| Theta range for data collection   | 3.21 to 24.20°.                                                                 |          |
| Index ranges                      | -11 ≤ h ≤ 11, -36 ≤ k ≤ 36, -14 ≤ l ≤ 15                                        |          |
| Reflections collected             | 21996                                                                           |          |
| Independent reflections           | 6436 [R(int) = 0.1892]                                                          |          |
| Completeness to theta = 24.20°    | 95.8 %                                                                          |          |
| Absorption correction             | Semi-empirical from equivalents                                                 |          |
| Max. and min. transmission        | 0.988 and 0.955                                                                 |          |
| Refinement method                 | Full-matrix least-squares on F <sup>2</sup>                                     |          |
| Data / restraints / parameters    | 6436 / 1 / 531                                                                  |          |
| Goodness-of-fit on F <sup>2</sup> | 0.923                                                                           |          |
| Final R indices [I > 2σ(I)]       | R1 = 0.0656, wR2 = 0.0915                                                       |          |
| R indices (all data)              | R1 = 0.1917, wR2 = 0.1215                                                       |          |
| Absolute structure parameter      | 0.04(5)                                                                         |          |
| Largest diff. peak and hole       | 0.301 and -0.325 e.Å <sup>-3</sup>                                              |          |

Table 2. Atomic coordinates ( $\times 10^4$ ) and equivalent isotropic displacement parameters ( $\text{\AA}^2 \times 10^3$ ) for 1a.  $U(\text{eq})$  is defined as one third of the trace of the orthogonalized  $U^{ij}$  tensor.

|       | x        | y       | z        | U(eq) |
|-------|----------|---------|----------|-------|
| C(1)  | 7959(8)  | 1638(3) | 5064(6)  | 45(2) |
| C(2)  | 7156(10) | 2020(3) | 5040(9)  | 82(4) |
| C(3)  | 5828(10) | 1893(3) | 5317(10) | 95(5) |
| C(4)  | 5792(8)  | 1440(3) | 5201(7)  | 49(3) |
| C(5)  | 9230(8)  | 12(3)   | 6687(6)  | 35(2) |
| C(6)  | 9123(8)  | 760(3)  | 6811(6)  | 30(2) |
| C(7)  | 10424(8) | 819(3)  | 8153(6)  | 37(2) |
| C(8)  | 10388(8) | 418(3)  | 7940(6)  | 38(2) |
| C(9)  | 9546(9)  | 1469(3) | 7434(6)  | 37(2) |
| C(10) | 10492(8) | 1692(3) | 6975(6)  | 40(2) |
| C(11) | 10394(9) | 2129(3) | 6970(6)  | 47(3) |
| C(12) | 9356(10) | 2324(3) | 7407(7)  | 55(3) |
| C(13) | 8391(10) | 2081(4) | 7853(7)  | 58(3) |
| C(14) | 8492(8)  | 1656(3) | 7866(6)  | 41(2) |
| C(15) | 7471(9)  | 1392(3) | 8393(6)  | 47(3) |
| C(16) | 7820(10) | 1367(3) | 9459(7)  | 73(3) |
| C(17) | 6072(9)  | 1556(3) | 8273(7)  | 75(3) |
| C(18) | 11676(9) | 1489(3) | 6497(7)  | 53(3) |
| C(19) | 12845(9) | 1505(3) | 7188(7)  | 75(3) |
| C(20) | 12012(9) | 1676(3) | 5521(8)  | 71(3) |
| C(21) | 9654(8)  | -386(3) | 6935(6)  | 38(2) |
| C(22) | 9192(7)  | -720(3) | 6409(6)  | 39(2) |
| C(23) | 8331(6)  | -669(3) | 5653(7)  | 40(2) |
| C(24) | 7964(7)  | -267(3) | 5455(6)  | 32(2) |
| C(25) | 6667(7)  | 260(3)  | 4659(6)  | 30(2) |
| C(26) | 5617(8)  | -184(3) | 3613(7)  | 42(2) |
| C(27) | 6453(8)  | -421(3) | 4106(7)  | 41(2) |
| C(28) | 4900(8)  | 555(3)  | 3648(6)  | 34(2) |
| C(29) | 3652(7)  | 577(3)  | 4028(6)  | 36(2) |
| C(30) | 2851(9)  | 896(3)  | 3726(7)  | 47(3) |

Electronic Supplementary Information for Dalton Transactions  
This journal is © The Royal Society of Chemistry 2005

|       |           |         |          |        |
|-------|-----------|---------|----------|--------|
| C(31) | 3269(8)   | 1183(3) | 3052(7)  | 48(3)  |
| C(32) | 4481(8)   | 1159(3) | 2674(6)  | 46(3)  |
| C(33) | 5323(8)   | 844(3)  | 2946(7)  | 42(2)  |
| C(34) | 6599(8)   | 787(3)  | 2443(6)  | 49(3)  |
| C(35) | 6384(10)  | 573(3)  | 1463(7)  | 79(4)  |
| C(36) | 7298(9)   | 1191(3) | 2292(7)  | 67(3)  |
| C(37) | 3175(7)   | 250(3)  | 4747(6)  | 40(2)  |
| C(38) | 2209(8)   | -41(2)  | 4249(6)  | 46(2)  |
| C(39) | 2542(7)   | 449(2)  | 5628(7)  | 49(2)  |
| C(40) | 8967(13)  | 2114(5) | 2237(12) | 120(5) |
| C(41) | 10181(10) | 1915(3) | 2599(8)  | 75(4)  |
| C(42) | 10267(17) | 2632(4) | 2721(13) | 136(7) |
| C(43) | 10773(14) | 2253(4) | 3186(10) | 132(6) |
| C(44) | 6811(11)  | 8298(4) | 5167(9)  | 94(4)  |
| C(45) | 6678(14)  | 7839(4) | 4959(9)  | 91(4)  |
| C(46) | 8061(12)  | 7701(4) | 5084(9)  | 86(4)  |
| C(47) | 8802(12)  | 8065(5) | 4705(10) | 102(4) |
| Cl(1) | 9350(2)   | 754(1)  | 4310(2)  | 43(1)  |
| Cl(2) | 6002(2)   | 634(1)  | 6764(2)  | 45(1)  |
| N(1)  | 8393(6)   | 73(2)   | 5936(5)  | 29(2)  |
| N(2)  | 9611(6)   | 374(2)  | 7126(5)  | 31(2)  |
| N(3)  | 9665(6)   | 1027(2) | 7455(5)  | 33(2)  |
| N(4)  | 7068(6)   | -150(2) | 4737(5)  | 33(2)  |
| N(5)  | 5750(6)   | 231(2)  | 3933(5)  | 35(2)  |
| O(1)  | 7111(5)   | 1293(2) | 5258(4)  | 44(2)  |
| O(2)  | 9232(12)  | 2538(4) | 2172(10) | 175(5) |
| O(3)  | 7986(11)  | 8425(3) | 4778(6)  | 122(4) |
| V(1)  | 7748(1)   | 672(1)  | 5600(1)  | 31(1)  |

---

Table 3. Bond lengths [ $\text{\AA}$ ] and angles [ $^\circ$ ] for 1a.

---

|             |           |
|-------------|-----------|
| C(1)-O(1)   | 1.434(8)  |
| C(1)-C(2)   | 1.478(11) |
| C(1)-H(1A)  | 0.9900    |
| C(1)-H(1B)  | 0.9900    |
| C(2)-C(3)   | 1.478(12) |
| C(2)-H(2A)  | 0.9900    |
| C(2)-H(2B)  | 0.9900    |
| C(3)-C(4)   | 1.459(11) |
| C(3)-H(3A)  | 0.9900    |
| C(3)-H(3B)  | 0.9900    |
| C(4)-O(1)   | 1.441(8)  |
| C(4)-H(4A)  | 0.9900    |
| C(4)-H(4B)  | 0.9900    |
| C(5)-N(1)   | 1.363(9)  |
| C(5)-N(2)   | 1.365(10) |
| C(5)-C(21)  | 1.388(10) |
| C(6)-N(3)   | 1.354(9)  |
| C(6)-N(2)   | 1.405(9)  |
| C(6)-V(1)   | 2.209(9)  |
| C(7)-C(8)   | 1.316(11) |
| C(7)-N(3)   | 1.409(10) |
| C(7)-H(7)   | 0.9500    |
| C(8)-N(2)   | 1.387(9)  |
| C(8)-H(8)   | 0.9500    |
| C(9)-C(10)  | 1.366(11) |
| C(9)-C(14)  | 1.377(11) |
| C(9)-N(3)   | 1.420(10) |
| C(10)-C(11) | 1.401(11) |
| C(10)-C(18) | 1.533(12) |
| C(11)-C(12) | 1.378(12) |
| C(11)-H(11) | 0.9500    |
| C(12)-C(13) | 1.405(12) |
| C(12)-H(12) | 0.9500    |

Electronic Supplementary Information for Dalton Transactions  
This journal is © The Royal Society of Chemistry 2005

|              |           |
|--------------|-----------|
| C(13)-C(14)  | 1.364(12) |
| C(13)-H(13)  | 0.9500    |
| C(14)-C(15)  | 1.533(12) |
| C(15)-C(16)  | 1.517(12) |
| C(15)-C(17)  | 1.544(12) |
| C(15)-H(15)  | 1.0000    |
| C(16)-H(16A) | 0.9800    |
| C(16)-H(16B) | 0.9800    |
| C(16)-H(16C) | 0.9800    |
| C(17)-H(17A) | 0.9800    |
| C(17)-H(17B) | 0.9800    |
| C(17)-H(17C) | 0.9800    |
| C(18)-C(20)  | 1.514(12) |
| C(18)-C(19)  | 1.537(12) |
| C(18)-H(18)  | 1.0000    |
| C(19)-H(19A) | 0.9800    |
| C(19)-H(19B) | 0.9800    |
| C(19)-H(19C) | 0.9800    |
| C(20)-H(20A) | 0.9800    |
| C(20)-H(20B) | 0.9800    |
| C(20)-H(20C) | 0.9800    |
| C(21)-C(22)  | 1.377(11) |
| C(21)-H(21)  | 0.9500    |
| C(22)-C(23)  | 1.380(11) |
| C(22)-H(22)  | 0.9500    |
| C(23)-C(24)  | 1.369(11) |
| C(23)-H(23)  | 0.9500    |
| C(24)-N(1)   | 1.348(9)  |
| C(24)-N(4)   | 1.405(9)  |
| C(25)-N(4)   | 1.378(10) |
| C(25)-N(5)   | 1.381(9)  |
| C(25)-V(1)   | 2.162(9)  |
| C(26)-C(27)  | 1.336(11) |
| C(26)-N(5)   | 1.406(10) |
| C(26)-H(26)  | 0.9500    |

Electronic Supplementary Information for Dalton Transactions  
This journal is © The Royal Society of Chemistry 2005

|              |           |
|--------------|-----------|
| C(27)-N(4)   | 1.384(9)  |
| C(27)-H(27)  | 0.9500    |
| C(28)-C(29)  | 1.392(11) |
| C(28)-C(33)  | 1.409(11) |
| C(28)-N(5)   | 1.414(10) |
| C(29)-C(30)  | 1.378(11) |
| C(29)-C(37)  | 1.525(11) |
| C(30)-C(31)  | 1.376(11) |
| C(30)-H(30)  | 0.9500    |
| C(31)-C(32)  | 1.356(11) |
| C(31)-H(31)  | 0.9500    |
| C(32)-C(33)  | 1.383(11) |
| C(32)-H(32)  | 0.9500    |
| C(33)-C(34)  | 1.498(11) |
| C(34)-C(36)  | 1.496(12) |
| C(34)-C(35)  | 1.533(12) |
| C(34)-H(34)  | 1.0000    |
| C(35)-H(35A) | 0.9800    |
| C(35)-H(35B) | 0.9800    |
| C(35)-H(35C) | 0.9800    |
| C(36)-H(36A) | 0.9800    |
| C(36)-H(36B) | 0.9800    |
| C(36)-H(36C) | 0.9800    |
| C(37)-C(39)  | 1.520(11) |
| C(37)-C(38)  | 1.527(10) |
| C(37)-H(37)  | 1.0000    |
| C(38)-H(38A) | 0.9800    |
| C(38)-H(38B) | 0.9800    |
| C(38)-H(38C) | 0.9800    |
| C(39)-H(39A) | 0.9800    |
| C(39)-H(39B) | 0.9800    |
| C(39)-H(39C) | 0.9800    |
| C(40)-O(2)   | 1.390(13) |
| C(40)-C(41)  | 1.490(14) |
| C(40)-H(40A) | 0.9900    |



Electronic Supplementary Information for Dalton Transactions  
This journal is © The Royal Society of Chemistry 2005

|                  |           |
|------------------|-----------|
| C(40)-H(40B)     | 0.9900    |
| C(41)-C(43)      | 1.483(14) |
| C(41)-H(41A)     | 0.9900    |
| C(41)-H(41B)     | 0.9900    |
| C(42)-O(2)       | 1.343(15) |
| C(42)-C(43)      | 1.467(15) |
| C(42)-H(42A)     | 0.9900    |
| C(42)-H(42B)     | 0.9900    |
| C(43)-H(43A)     | 0.9900    |
| C(43)-H(43B)     | 0.9900    |
| C(44)-O(3)       | 1.386(12) |
| C(44)-C(45)      | 1.504(13) |
| C(44)-H(44A)     | 0.9900    |
| C(44)-H(44B)     | 0.9900    |
| C(45)-C(46)      | 1.502(14) |
| C(45)-H(45A)     | 0.9900    |
| C(45)-H(45B)     | 0.9900    |
| C(46)-C(47)      | 1.489(14) |
| C(46)-H(46A)     | 0.9900    |
| C(46)-H(46B)     | 0.9900    |
| C(47)-O(3)       | 1.428(13) |
| C(47)-H(47A)     | 0.9900    |
| C(47)-H(47B)     | 0.9900    |
| Cl(1)-V(1)       | 2.443(3)  |
| Cl(2)-V(1)       | 2.416(3)  |
| N(1)-V(1)        | 2.084(7)  |
| O(1)-V(1)        | 2.145(5)  |
| O(1)-C(1)-C(2)   | 107.5(7)  |
| O(1)-C(1)-H(1A)  | 110.2     |
| C(2)-C(1)-H(1A)  | 110.2     |
| O(1)-C(1)-H(1B)  | 110.2     |
| C(2)-C(1)-H(1B)  | 110.2     |
| H(1A)-C(1)-H(1B) | 108.5     |
| C(1)-C(2)-C(3)   | 106.5(8)  |

Electronic Supplementary Information for Dalton Transactions  
This journal is © The Royal Society of Chemistry 2005

|                   |          |
|-------------------|----------|
| C(1)-C(2)-H(2A)   | 110.4    |
| C(3)-C(2)-H(2A)   | 110.4    |
| C(1)-C(2)-H(2B)   | 110.4    |
| C(3)-C(2)-H(2B)   | 110.4    |
| H(2A)-C(2)-H(2B)  | 108.6    |
| C(4)-C(3)-C(2)    | 105.6(8) |
| C(4)-C(3)-H(3A)   | 110.6    |
| C(2)-C(3)-H(3A)   | 110.6    |
| C(4)-C(3)-H(3B)   | 110.6    |
| C(2)-C(3)-H(3B)   | 110.6    |
| H(3A)-C(3)-H(3B)  | 108.7    |
| O(1)-C(4)-C(3)    | 107.2(7) |
| O(1)-C(4)-H(4A)   | 110.3    |
| C(3)-C(4)-H(4A)   | 110.3    |
| O(1)-C(4)-H(4B)   | 110.3    |
| C(3)-C(4)-H(4B)   | 110.3    |
| H(4A)-C(4)-H(4B)  | 108.5    |
| N(1)-C(5)-N(2)    | 113.4(8) |
| N(1)-C(5)-C(21)   | 121.2(8) |
| N(2)-C(5)-C(21)   | 125.3(8) |
| N(3)-C(6)-N(2)    | 101.8(7) |
| N(3)-C(6)-V(1)    | 147.3(7) |
| N(2)-C(6)-V(1)    | 110.6(5) |
| C(8)-C(7)-N(3)    | 107.0(8) |
| C(8)-C(7)-H(7)    | 126.5    |
| N(3)-C(7)-H(7)    | 126.5    |
| C(7)-C(8)-N(2)    | 107.4(8) |
| C(7)-C(8)-H(8)    | 126.3    |
| N(2)-C(8)-H(8)    | 126.3    |
| C(10)-C(9)-C(14)  | 122.4(9) |
| C(10)-C(9)-N(3)   | 118.1(9) |
| C(14)-C(9)-N(3)   | 119.5(8) |
| C(9)-C(10)-C(11)  | 118.3(9) |
| C(9)-C(10)-C(18)  | 123.0(9) |
| C(11)-C(10)-C(18) | 118.6(8) |

Electronic Supplementary Information for Dalton Transactions  
This journal is © The Royal Society of Chemistry 2005

|                     |          |
|---------------------|----------|
| C(12)-C(11)-C(10)   | 120.4(9) |
| C(12)-C(11)-H(11)   | 119.8    |
| C(10)-C(11)-H(11)   | 119.8    |
| C(11)-C(12)-C(13)   | 119.4(9) |
| C(11)-C(12)-H(12)   | 120.3    |
| C(13)-C(12)-H(12)   | 120.3    |
| C(14)-C(13)-C(12)   | 120.3(9) |
| C(14)-C(13)-H(13)   | 119.9    |
| C(12)-C(13)-H(13)   | 119.9    |
| C(13)-C(14)-C(9)    | 119.3(9) |
| C(13)-C(14)-C(15)   | 120.3(9) |
| C(9)-C(14)-C(15)    | 120.4(9) |
| C(16)-C(15)-C(14)   | 109.1(7) |
| C(16)-C(15)-C(17)   | 110.0(8) |
| C(14)-C(15)-C(17)   | 113.7(8) |
| C(16)-C(15)-H(15)   | 108.0    |
| C(14)-C(15)-H(15)   | 108.0    |
| C(17)-C(15)-H(15)   | 108.0    |
| C(15)-C(16)-H(16A)  | 109.5    |
| C(15)-C(16)-H(16B)  | 109.5    |
| H(16A)-C(16)-H(16B) | 109.5    |
| C(15)-C(16)-H(16C)  | 109.5    |
| H(16A)-C(16)-H(16C) | 109.5    |
| H(16B)-C(16)-H(16C) | 109.5    |
| C(15)-C(17)-H(17A)  | 109.5    |
| C(15)-C(17)-H(17B)  | 109.5    |
| H(17A)-C(17)-H(17B) | 109.5    |
| C(15)-C(17)-H(17C)  | 109.5    |
| H(17A)-C(17)-H(17C) | 109.5    |
| H(17B)-C(17)-H(17C) | 109.5    |
| C(20)-C(18)-C(10)   | 113.4(8) |
| C(20)-C(18)-C(19)   | 111.1(8) |
| C(10)-C(18)-C(19)   | 110.0(8) |
| C(20)-C(18)-H(18)   | 107.4    |
| C(10)-C(18)-H(18)   | 107.4    |

Electronic Supplementary Information for Dalton Transactions  
This journal is © The Royal Society of Chemistry 2005

|                     |          |
|---------------------|----------|
| C(19)-C(18)-H(18)   | 107.4    |
| C(18)-C(19)-H(19A)  | 109.5    |
| C(18)-C(19)-H(19B)  | 109.5    |
| H(19A)-C(19)-H(19B) | 109.5    |
| C(18)-C(19)-H(19C)  | 109.5    |
| H(19A)-C(19)-H(19C) | 109.5    |
| H(19B)-C(19)-H(19C) | 109.5    |
| C(18)-C(20)-H(20A)  | 109.5    |
| C(18)-C(20)-H(20B)  | 109.5    |
| H(20A)-C(20)-H(20B) | 109.5    |
| C(18)-C(20)-H(20C)  | 109.5    |
| H(20A)-C(20)-H(20C) | 109.5    |
| H(20B)-C(20)-H(20C) | 109.5    |
| C(22)-C(21)-C(5)    | 118.2(8) |
| C(22)-C(21)-H(21)   | 120.9    |
| C(5)-C(21)-H(21)    | 120.9    |
| C(21)-C(22)-C(23)   | 122.0(8) |
| C(21)-C(22)-H(22)   | 119.0    |
| C(23)-C(22)-H(22)   | 119.0    |
| C(24)-C(23)-C(22)   | 116.0(8) |
| C(24)-C(23)-H(23)   | 122.0    |
| C(22)-C(23)-H(23)   | 122.0    |
| N(1)-C(24)-C(23)    | 124.7(8) |
| N(1)-C(24)-N(4)     | 110.4(8) |
| C(23)-C(24)-N(4)    | 124.9(8) |
| N(4)-C(25)-N(5)     | 101.5(7) |
| N(4)-C(25)-V(1)     | 112.3(6) |
| N(5)-C(25)-V(1)     | 146.1(7) |
| C(27)-C(26)-N(5)    | 108.3(8) |
| C(27)-C(26)-H(26)   | 125.9    |
| N(5)-C(26)-H(26)    | 125.9    |
| C(26)-C(27)-N(4)    | 105.1(8) |
| C(26)-C(27)-H(27)   | 127.5    |
| N(4)-C(27)-H(27)    | 127.5    |
| C(29)-C(28)-C(33)   | 120.8(8) |

Electronic Supplementary Information for Dalton Transactions  
This journal is © The Royal Society of Chemistry 2005

|                     |          |
|---------------------|----------|
| C(29)-C(28)-N(5)    | 120.3(8) |
| C(33)-C(28)-N(5)    | 118.8(8) |
| C(30)-C(29)-C(28)   | 118.5(8) |
| C(30)-C(29)-C(37)   | 120.9(8) |
| C(28)-C(29)-C(37)   | 120.6(8) |
| C(31)-C(30)-C(29)   | 120.8(8) |
| C(31)-C(30)-H(30)   | 119.6    |
| C(29)-C(30)-H(30)   | 119.6    |
| C(32)-C(31)-C(30)   | 120.7(9) |
| C(32)-C(31)-H(31)   | 119.7    |
| C(30)-C(31)-H(31)   | 119.7    |
| C(31)-C(32)-C(33)   | 121.0(9) |
| C(31)-C(32)-H(32)   | 119.5    |
| C(33)-C(32)-H(32)   | 119.5    |
| C(32)-C(33)-C(28)   | 118.1(8) |
| C(32)-C(33)-C(34)   | 120.9(9) |
| C(28)-C(33)-C(34)   | 120.8(8) |
| C(36)-C(34)-C(33)   | 112.5(8) |
| C(36)-C(34)-C(35)   | 109.4(8) |
| C(33)-C(34)-C(35)   | 109.7(8) |
| C(36)-C(34)-H(34)   | 108.4    |
| C(33)-C(34)-H(34)   | 108.4    |
| C(35)-C(34)-H(34)   | 108.4    |
| C(34)-C(35)-H(35A)  | 109.5    |
| C(34)-C(35)-H(35B)  | 109.5    |
| H(35A)-C(35)-H(35B) | 109.5    |
| C(34)-C(35)-H(35C)  | 109.5    |
| H(35A)-C(35)-H(35C) | 109.5    |
| H(35B)-C(35)-H(35C) | 109.5    |
| C(34)-C(36)-H(36A)  | 109.5    |
| C(34)-C(36)-H(36B)  | 109.5    |
| H(36A)-C(36)-H(36B) | 109.5    |
| C(34)-C(36)-H(36C)  | 109.5    |
| H(36A)-C(36)-H(36C) | 109.5    |
| H(36B)-C(36)-H(36C) | 109.5    |

Electronic Supplementary Information for Dalton Transactions  
This journal is © The Royal Society of Chemistry 2005

|                     |           |
|---------------------|-----------|
| C(39)-C(37)-C(29)   | 111.8(7)  |
| C(39)-C(37)-C(38)   | 109.7(6)  |
| C(29)-C(37)-C(38)   | 109.7(7)  |
| C(39)-C(37)-H(37)   | 108.6     |
| C(29)-C(37)-H(37)   | 108.6     |
| C(38)-C(37)-H(37)   | 108.6     |
| C(37)-C(38)-H(38A)  | 109.5     |
| C(37)-C(38)-H(38B)  | 109.5     |
| H(38A)-C(38)-H(38B) | 109.5     |
| C(37)-C(38)-H(38C)  | 109.5     |
| H(38A)-C(38)-H(38C) | 109.5     |
| H(38B)-C(38)-H(38C) | 109.5     |
| C(37)-C(39)-H(39A)  | 109.5     |
| C(37)-C(39)-H(39B)  | 109.5     |
| H(39A)-C(39)-H(39B) | 109.5     |
| C(37)-C(39)-H(39C)  | 109.5     |
| H(39A)-C(39)-H(39C) | 109.5     |
| H(39B)-C(39)-H(39C) | 109.5     |
| O(2)-C(40)-C(41)    | 105.9(11) |
| O(2)-C(40)-H(40A)   | 110.5     |
| C(41)-C(40)-H(40A)  | 110.5     |
| O(2)-C(40)-H(40B)   | 110.5     |
| C(41)-C(40)-H(40B)  | 110.5     |
| H(40A)-C(40)-H(40B) | 108.7     |
| C(43)-C(41)-C(40)   | 102.5(10) |
| C(43)-C(41)-H(41A)  | 111.3     |
| C(40)-C(41)-H(41A)  | 111.3     |
| C(43)-C(41)-H(41B)  | 111.3     |
| C(40)-C(41)-H(41B)  | 111.3     |
| H(41A)-C(41)-H(41B) | 109.2     |
| O(2)-C(42)-C(43)    | 110.2(12) |
| O(2)-C(42)-H(42A)   | 109.6     |
| C(43)-C(42)-H(42A)  | 109.6     |
| O(2)-C(42)-H(42B)   | 109.6     |
| C(43)-C(42)-H(42B)  | 109.6     |

Electronic Supplementary Information for Dalton Transactions  
This journal is © The Royal Society of Chemistry 2005

|                     |           |
|---------------------|-----------|
| H(42A)-C(42)-H(42B) | 108.1     |
| C(42)-C(43)-C(41)   | 102.6(10) |
| C(42)-C(43)-H(43A)  | 111.2     |
| C(41)-C(43)-H(43A)  | 111.2     |
| C(42)-C(43)-H(43B)  | 111.2     |
| C(41)-C(43)-H(43B)  | 111.2     |
| H(43A)-C(43)-H(43B) | 109.2     |
| O(3)-C(44)-C(45)    | 106.9(10) |
| O(3)-C(44)-H(44A)   | 110.3     |
| C(45)-C(44)-H(44A)  | 110.3     |
| O(3)-C(44)-H(44B)   | 110.3     |
| C(45)-C(44)-H(44B)  | 110.3     |
| H(44A)-C(44)-H(44B) | 108.6     |
| C(46)-C(45)-C(44)   | 100.3(10) |
| C(46)-C(45)-H(45A)  | 111.7     |
| C(44)-C(45)-H(45A)  | 111.7     |
| C(46)-C(45)-H(45B)  | 111.7     |
| C(44)-C(45)-H(45B)  | 111.7     |
| H(45A)-C(45)-H(45B) | 109.5     |
| C(47)-C(46)-C(45)   | 102.5(10) |
| C(47)-C(46)-H(46A)  | 111.3     |
| C(45)-C(46)-H(46A)  | 111.3     |
| C(47)-C(46)-H(46B)  | 111.3     |
| C(45)-C(46)-H(46B)  | 111.3     |
| H(46A)-C(46)-H(46B) | 109.2     |
| O(3)-C(47)-C(46)    | 107.7(10) |
| O(3)-C(47)-H(47A)   | 110.2     |
| C(46)-C(47)-H(47A)  | 110.2     |
| O(3)-C(47)-H(47B)   | 110.2     |
| C(46)-C(47)-H(47B)  | 110.2     |
| H(47A)-C(47)-H(47B) | 108.5     |
| C(24)-N(1)-C(5)     | 117.8(8)  |
| C(24)-N(1)-V(1)     | 121.9(6)  |
| C(5)-N(1)-V(1)      | 120.2(6)  |
| C(5)-N(2)-C(8)      | 127.8(8)  |

Electronic Supplementary Information for Dalton Transactions  
This journal is © The Royal Society of Chemistry 2005

|                  |            |
|------------------|------------|
| C(5)-N(2)-C(6)   | 120.5(7)   |
| C(8)-N(2)-C(6)   | 111.5(7)   |
| C(6)-N(3)-C(7)   | 112.3(7)   |
| C(6)-N(3)-C(9)   | 125.4(8)   |
| C(7)-N(3)-C(9)   | 122.2(8)   |
| C(25)-N(4)-C(27) | 114.2(7)   |
| C(25)-N(4)-C(24) | 120.4(7)   |
| C(27)-N(4)-C(24) | 125.2(8)   |
| C(25)-N(5)-C(26) | 111.0(7)   |
| C(25)-N(5)-C(28) | 125.2(7)   |
| C(26)-N(5)-C(28) | 123.1(7)   |
| C(1)-O(1)-C(4)   | 108.2(6)   |
| C(1)-O(1)-V(1)   | 124.6(4)   |
| C(4)-O(1)-V(1)   | 127.2(5)   |
| C(42)-O(2)-C(40) | 109.7(12)  |
| C(44)-O(3)-C(47) | 107.8(9)   |
| N(1)-V(1)-O(1)   | 179.2(3)   |
| N(1)-V(1)-C(25)  | 74.7(3)    |
| O(1)-V(1)-C(25)  | 106.0(3)   |
| N(1)-V(1)-C(6)   | 75.2(3)    |
| O(1)-V(1)-C(6)   | 104.2(3)   |
| C(25)-V(1)-C(6)  | 149.6(3)   |
| N(1)-V(1)-Cl(2)  | 92.47(17)  |
| O(1)-V(1)-Cl(2)  | 88.00(16)  |
| C(25)-V(1)-Cl(2) | 89.2(2)    |
| C(6)-V(1)-Cl(2)  | 88.9(2)    |
| N(1)-V(1)-Cl(1)  | 92.56(17)  |
| O(1)-V(1)-Cl(1)  | 87.02(16)  |
| C(25)-V(1)-Cl(1) | 88.6(2)    |
| C(6)-V(1)-Cl(1)  | 96.0(2)    |
| Cl(2)-V(1)-Cl(1) | 173.73(10) |

---

Symmetry transformations used to generate equivalent atoms:



Table 4. Anisotropic displacement parameters ( $\text{\AA}^2 \times 10^3$ ) for 1a. The anisotropic displacement factor exponent takes the form:  $-2\pi^2 [ h^2 a^{*2} U^{11} + \dots + 2 h k a^* b^* U^{12} ]$

|       | $U^{11}$ | $U^{22}$ | $U^{33}$ | $U^{23}$ | $U^{13}$ | $U^{12}$ |
|-------|----------|----------|----------|----------|----------|----------|
| C(1)  | 41(6)    | 52(7)    | 40(6)    | 9(5)     | -7(5)    | -8(5)    |
| C(2)  | 75(8)    | 47(8)    | 125(10)  | 19(7)    | 5(8)     | 21(7)    |
| C(3)  | 58(7)    | 44(8)    | 183(15)  | -1(8)    | 8(9)     | 17(6)    |
| C(4)  | 33(5)    | 50(7)    | 63(7)    | -6(5)    | 3(5)     | 8(4)     |
| C(5)  | 22(5)    | 52(7)    | 30(6)    | 0(6)     | 3(5)     | -2(5)    |
| C(6)  | 33(5)    | 25(6)    | 31(5)    | -4(5)    | 8(5)     | -13(4)   |
| C(7)  | 30(5)    | 48(7)    | 34(6)    | -4(5)    | -10(5)   | -3(5)    |
| C(8)  | 24(5)    | 61(8)    | 29(6)    | 8(5)     | -3(5)    | 0(5)     |
| C(9)  | 33(6)    | 36(7)    | 43(6)    | 4(5)     | -9(5)    | -4(5)    |
| C(10) | 42(6)    | 46(7)    | 33(6)    | 2(5)     | -1(5)    | -3(5)    |
| C(11) | 58(7)    | 41(7)    | 40(6)    | -1(5)    | 3(5)     | -13(5)   |
| C(12) | 69(8)    | 40(7)    | 57(7)    | -6(6)    | -1(6)    | 0(6)     |
| C(13) | 51(7)    | 75(10)   | 47(7)    | -17(7)   | 2(6)     | -1(6)    |
| C(14) | 40(6)    | 48(8)    | 36(6)    | 2(5)     | -11(5)   | 5(5)     |
| C(15) | 44(6)    | 57(7)    | 41(6)    | -9(5)    | 16(5)    | -9(5)    |
| C(16) | 65(7)    | 92(9)    | 62(8)    | 18(6)    | -3(6)    | 0(6)     |
| C(17) | 54(7)    | 114(10)  | 57(7)    | -23(7)   | 18(6)    | -1(7)    |
| C(18) | 39(6)    | 61(7)    | 58(7)    | -4(6)    | -5(6)    | -11(5)   |
| C(19) | 46(6)    | 104(10)  | 76(8)    | 8(7)     | 13(7)    | -6(6)    |
| C(20) | 65(7)    | 90(8)    | 58(7)    | 4(8)     | 13(7)    | 3(6)     |
| C(21) | 29(5)    | 43(7)    | 43(6)    | 6(5)     | -3(5)    | 4(5)     |
| C(22) | 34(5)    | 25(6)    | 57(6)    | 15(5)    | -3(5)    | 11(5)    |
| C(23) | 25(4)    | 37(6)    | 57(6)    | -14(6)   | -3(6)    | -7(4)    |
| C(24) | 23(5)    | 51(7)    | 24(6)    | -2(6)    | 13(5)    | -7(5)    |
| C(25) | 18(5)    | 43(7)    | 29(5)    | 3(5)     | 1(4)     | 2(4)     |
| C(26) | 29(5)    | 52(7)    | 46(6)    | -24(6)   | -5(5)    | -2(5)    |
| C(27) | 35(5)    | 38(6)    | 49(6)    | -9(6)    | -2(5)    | 6(5)     |
| C(28) | 37(6)    | 42(7)    | 25(5)    | -8(5)    | -15(5)   | -2(5)    |
| C(29) | 22(5)    | 46(7)    | 41(6)    | -8(5)    | -4(5)    | -2(4)    |
| C(30) | 31(5)    | 52(7)    | 57(7)    | -1(6)    | 4(5)     | 14(5)    |

Electronic Supplementary Information for Dalton Transactions  
This journal is © The Royal Society of Chemistry 2005

|       |         |         |         |         |          |        |
|-------|---------|---------|---------|---------|----------|--------|
| C(31) | 24(5)   | 72(8)   | 48(6)   | 15(6)   | -2(5)    | 12(5)  |
| C(32) | 43(6)   | 57(7)   | 37(6)   | 10(5)   | -4(5)    | 5(6)   |
| C(33) | 31(6)   | 58(7)   | 39(6)   | -8(6)   | -11(5)   | 9(5)   |
| C(34) | 35(6)   | 70(8)   | 41(6)   | 13(6)   | 14(5)    | 0(5)   |
| C(35) | 101(9)  | 70(9)   | 65(8)   | -19(7)  | 27(7)    | 4(7)   |
| C(36) | 34(6)   | 114(10) | 53(7)   | 0(7)    | 7(6)     | 18(7)  |
| C(37) | 24(5)   | 45(6)   | 51(6)   | -1(5)   | -1(5)    | 10(4)  |
| C(38) | 41(5)   | 49(6)   | 48(6)   | 0(5)    | 12(5)    | -5(5)  |
| C(39) | 27(5)   | 66(6)   | 54(5)   | -8(7)   | 0(6)     | 1(4)   |
| C(40) | 105(12) | 73(11)  | 181(16) | 11(10)  | 12(11)   | -15(9) |
| C(41) | 50(7)   | 70(9)   | 104(10) | 5(8)    | -11(7)   | 3(7)   |
| C(42) | 170(17) | 54(10)  | 183(17) | -9(11)  | -84(14)  | 7(11)  |
| C(43) | 169(15) | 71(11)  | 157(14) | -34(10) | -104(13) | -1(10) |
| C(44) | 72(9)   | 111(12) | 100(10) | -51(9)  | -10(8)   | 22(8)  |
| C(45) | 112(12) | 83(11)  | 79(9)   | -7(8)   | -11(8)   | -8(9)  |
| C(46) | 105(12) | 80(10)  | 74(9)   | 2(7)    | -15(9)   | -18(9) |
| C(47) | 89(10)  | 108(12) | 107(11) | -22(9)  | 36(8)    | 2(10)  |
| Cl(1) | 29(1)   | 64(2)   | 35(1)   | 0(1)    | 5(1)     | 3(1)   |
| Cl(2) | 37(1)   | 62(2)   | 36(2)   | 7(1)    | 6(1)     | -4(1)  |
| N(1)  | 23(4)   | 37(5)   | 28(5)   | 2(4)    | 0(4)     | 2(3)   |
| N(2)  | 22(4)   | 39(5)   | 32(5)   | 5(4)    | -4(4)    | -6(4)  |
| N(3)  | 25(4)   | 40(5)   | 35(5)   | 6(4)    | 4(4)     | -2(4)  |
| N(4)  | 23(4)   | 47(6)   | 28(4)   | -11(4)  | -6(4)    | -9(4)  |
| N(5)  | 25(4)   | 49(6)   | 30(5)   | 1(4)    | 7(4)     | 10(4)  |
| O(1)  | 27(3)   | 37(4)   | 67(5)   | 16(3)   | 6(3)     | 6(3)   |
| O(2)  | 158(10) | 115(10) | 252(16) | 39(10)  | -85(10)  | 0(8)   |
| O(3)  | 154(10) | 80(7)   | 133(8)  | -32(6)  | 77(7)    | -33(7) |
| V(1)  | 23(1)   | 40(1)   | 30(1)   | 0(1)    | 2(1)     | 0(1)   |

---

### Structural Data for 1b

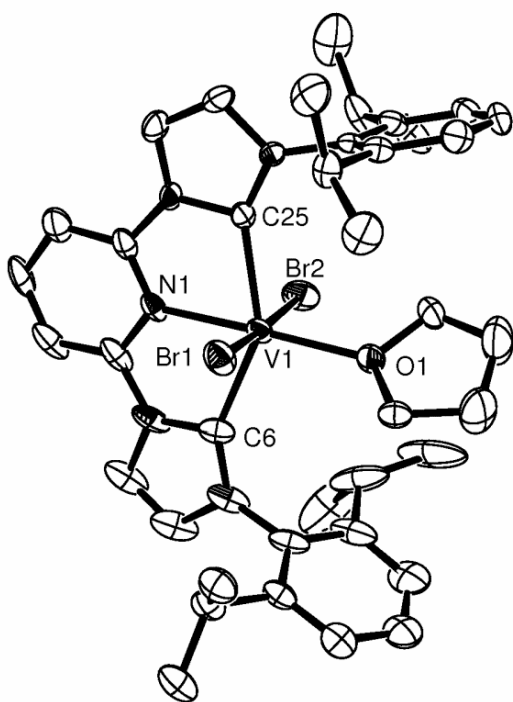

Table 1. Crystal data and structure refinement for **1b**

|                                   |                                                                    |                  |
|-----------------------------------|--------------------------------------------------------------------|------------------|
| Identification code               | <b>1b</b>                                                          |                  |
| Empirical formula                 | C <sub>39</sub> H <sub>49</sub> Br <sub>2</sub> N <sub>5</sub> O V |                  |
| Formula weight                    | 814.59                                                             |                  |
| Temperature                       | 120(2) K                                                           |                  |
| Wavelength                        | 0.71073 Å                                                          |                  |
| Crystal system                    | Monoclinic                                                         |                  |
| Space group                       | P 2 <sub>1</sub> /c                                                |                  |
| Unit cell dimensions              | a = 15.6919(15) Å                                                  | α = 90°.         |
|                                   | b = 14.6332(15) Å                                                  | β = 102.828(7)°. |
|                                   | c = 17.1157(12) Å                                                  | γ = 90°.         |
| Volume                            | 3832.1(6) Å <sup>3</sup>                                           |                  |
| Z                                 | 4                                                                  |                  |
| Density (calculated)              | 1.412 Mg/m <sup>3</sup>                                            |                  |
| Absorption coefficient            | 2.381 mm <sup>-1</sup>                                             |                  |
| F(000)                            | 1676                                                               |                  |
| Crystal size                      | 0.20 x 0.10 x 0.02 mm <sup>3</sup>                                 |                  |
| Theta range for data collection   | 3.00 to 27.64°.                                                    |                  |
| Index ranges                      | -20 ≤ h ≤ 20, -18 ≤ k ≤ 19, -22 ≤ l ≤ 20                           |                  |
| Reflections collected             | 36118                                                              |                  |
| Independent reflections           | 8801 [R(int) = 0.0883]                                             |                  |
| Completeness to theta = 27.64°    | 98.5 %                                                             |                  |
| Absorption correction             | Semi-empirical from equivalents                                    |                  |
| Max. and min. transmission        | 0.9539 and 0.5780                                                  |                  |
| Refinement method                 | Full-matrix least-squares on F <sup>2</sup>                        |                  |
| Data / restraints / parameters    | 8801 / 4 / 445                                                     |                  |
| Goodness-of-fit on F <sup>2</sup> | 1.019                                                              |                  |
| Final R indices [I > 2σ(I)]       | R1 = 0.0755, wR2 = 0.1573                                          |                  |
| R indices (all data)              | R1 = 0.1398, wR2 = 0.1831                                          |                  |
| Largest diff. peak and hole       | 0.772 and -0.988 e.Å <sup>-3</sup>                                 |                  |

Table 2. Atomic coordinates ( $\times 10^4$ ) and equivalent isotropic displacement parameters ( $\text{\AA}^2 \times 10^3$ ) for **1b**.  $U(\text{eq})$  is defined as one third of the trace of the orthogonalized  $U^{ij}$  tensor.

|        | x        | y        | z        | $U(\text{eq})$ |
|--------|----------|----------|----------|----------------|
| C(1A)  | 3674(4)  | 4140(4)  | 3455(4)  | 42(2)          |
| C(2A)  | 4300(30) | 4679(17) | 4068(18) | 62(5)          |
| C(3A)  | 4371(6)  | 5584(5)  | 3679(5)  | 72(3)          |
| C(1B)  | 3674(4)  | 4140(4)  | 3455(4)  | 42(2)          |
| C(2B)  | 4550(10) | 4586(8)  | 3793(14) | 62(5)          |
| C(3B)  | 4371(6)  | 5584(5)  | 3679(5)  | 72(3)          |
| C(4)   | 3604(4)  | 5667(4)  | 2987(4)  | 37(2)          |
| C(5)   | 155(4)   | 4542(4)  | 1090(4)  | 34(2)          |
| C(6)   | 1031(4)  | 5468(4)  | 2137(4)  | 30(1)          |
| C(7)   | -39(5)   | 6431(5)  | 2320(5)  | 47(2)          |
| C(8)   | -423(4)  | 5851(5)  | 1767(5)  | 46(2)          |
| C(9)   | 1457(4)  | 6765(4)  | 3094(4)  | 35(2)          |
| C(10)  | 1672(4)  | 7608(4)  | 2833(4)  | 32(1)          |
| C(11)  | 2226(4)  | 8165(5)  | 3382(4)  | 38(2)          |
| C(12)  | 2550(5)  | 7895(5)  | 4154(4)  | 48(2)          |
| C(13)  | 2346(5)  | 7061(5)  | 4395(4)  | 53(2)          |
| C(14)  | 1784(6)  | 6462(5)  | 3890(4)  | 51(2)          |
| C(15)  | 1507(8)  | 5564(5)  | 4161(5)  | 82(4)          |
| C(16A) | 635(8)   | 5648(7)  | 4360(6)  | 110(5)         |
| C(17)  | 2170(10) | 5146(6)  | 4859(5)  | 129(6)         |
| C(18)  | 1352(4)  | 7928(4)  | 1974(4)  | 35(2)          |
| C(19)  | 2120(4)  | 7968(5)  | 1558(4)  | 41(2)          |
| C(20)  | 886(4)   | 8852(5)  | 1924(4)  | 45(2)          |
| C(21)  | -610(4)  | 4316(5)  | 550(5)   | 43(2)          |
| C(22)  | -574(4)  | 3627(5)  | 15(4)    | 46(2)          |
| C(23)  | 196(4)   | 3163(4)  | 16(4)    | 44(2)          |
| C(24)  | 930(4)   | 3445(4)  | 586(4)   | 31(1)          |
| C(25)  | 2407(3)  | 3240(4)  | 1345(3)  | 23(1)          |
| C(26)  | 2838(4)  | 2159(4)  | 553(3)   | 31(1)          |
| C(27)  | 2024(4)  | 2382(4)  | 195(4)   | 32(1)          |

Electronic Supplementary Information for Dalton Transactions  
This journal is © The Royal Society of Chemistry 2005

|       |         |         |         |       |
|-------|---------|---------|---------|-------|
| C(28) | 3878(4) | 2573(3) | 1837(3) | 22(1) |
| C(29) | 4609(4) | 3011(4) | 1697(3) | 27(1) |
| C(30) | 5397(4) | 2877(4) | 2267(4) | 33(1) |
| C(31) | 5422(4) | 2337(4) | 2924(4) | 32(1) |
| C(32) | 4683(4) | 1896(4) | 3034(3) | 30(1) |
| C(33) | 3886(4) | 1996(4) | 2492(3) | 28(1) |
| C(34) | 3078(4) | 1499(5) | 2606(4) | 44(2) |
| C(35) | 3058(5) | 1340(5) | 3479(5) | 56(2) |
| C(36) | 2992(6) | 592(5)  | 2153(5) | 70(3) |
| C(37) | 4585(4) | 3593(4) | 965(3)  | 32(1) |
| C(38) | 4974(5) | 3065(5) | 361(4)  | 47(2) |
| C(39) | 5054(5) | 4498(5) | 1169(4) | 48(2) |
| Br(1) | 2668(1) | 5400(1) | 964(1)  | 37(1) |
| Br(2) | 1508(1) | 3371(1) | 3002(1) | 42(1) |
| N(1)  | 914(3)  | 4105(3) | 1107(3) | 26(1) |
| N(2)  | 230(3)  | 5249(3) | 1649(3) | 35(1) |
| N(3)  | 835(3)  | 6210(3) | 2537(3) | 37(1) |
| N(4)  | 1754(3) | 3031(3) | 680(3)  | 26(1) |
| N(5)  | 3062(3) | 2678(3) | 1259(3) | 22(1) |
| O(1)  | 3141(3) | 4801(3) | 2934(2) | 30(1) |
| V(1)  | 2031(1) | 4441(1) | 1990(1) | 24(1) |

---

Table 3. Bond lengths [ $\text{\AA}$ ] and angles [ $^\circ$ ] for **1b**.

---

|              |           |
|--------------|-----------|
| C(1A)-O(1)   | 1.448(7)  |
| C(1A)-C(2A)  | 1.495(18) |
| C(1A)-H(1A1) | 0.9900    |
| C(1A)-H(1A2) | 0.9900    |
| C(2A)-C(3A)  | 1.497(19) |
| C(2A)-H(2A1) | 0.9900    |
| C(2A)-H(2A2) | 0.9900    |
| C(3A)-C(4)   | 1.494(10) |
| C(3A)-H(3A1) | 0.9900    |
| C(3A)-H(3A2) | 0.9900    |
| C(2B)-H(2B1) | 0.9900    |
| C(2B)-H(2B2) | 0.9900    |
| C(4)-O(1)    | 1.453(7)  |
| C(4)-H(4A)   | 0.9900    |
| C(4)-H(4B)   | 0.9900    |
| C(5)-N(1)    | 1.347(7)  |
| C(5)-C(21)   | 1.383(9)  |
| C(5)-N(2)    | 1.396(8)  |
| C(6)-N(3)    | 1.355(8)  |
| C(6)-N(2)    | 1.383(8)  |
| C(6)-V(1)    | 2.227(6)  |
| C(7)-C(8)    | 1.314(10) |
| C(7)-N(3)    | 1.378(8)  |
| C(7)-H(7)    | 0.9500    |
| C(8)-N(2)    | 1.399(8)  |
| C(8)-H(8)    | 0.9500    |
| C(9)-C(10)   | 1.378(8)  |
| C(9)-C(14)   | 1.418(9)  |
| C(9)-N(3)    | 1.452(8)  |
| C(10)-C(11)  | 1.394(9)  |
| C(10)-C(18)  | 1.518(8)  |
| C(11)-C(12)  | 1.365(9)  |
| C(11)-H(11)  | 0.9500    |

Electronic Supplementary Information for Dalton Transactions  
This journal is © The Royal Society of Chemistry 2005

|               |           |
|---------------|-----------|
| C(12)-C(13)   | 1.349(10) |
| C(12)-H(12)   | 0.9500    |
| C(13)-C(14)   | 1.397(11) |
| C(13)-H(13)   | 0.9500    |
| C(14)-C(15)   | 1.489(10) |
| C(15)-C(16A)  | 1.487(15) |
| C(15)-C(17)   | 1.528(14) |
| C(15)-H(15)   | 1.0000    |
| C(16A)-H(16A) | 0.9800    |
| C(16A)-H(16B) | 0.9800    |
| C(16A)-H(16C) | 0.9800    |
| C(17)-H(17A)  | 0.9800    |
| C(17)-H(17B)  | 0.9800    |
| C(17)-H(17C)  | 0.9800    |
| C(18)-C(19)   | 1.531(8)  |
| C(18)-C(20)   | 1.532(9)  |
| C(18)-H(18)   | 1.0000    |
| C(19)-H(19A)  | 0.9800    |
| C(19)-H(19B)  | 0.9800    |
| C(19)-H(19C)  | 0.9800    |
| C(20)-H(20A)  | 0.9800    |
| C(20)-H(20B)  | 0.9800    |
| C(20)-H(20C)  | 0.9800    |
| C(21)-C(22)   | 1.372(10) |
| C(21)-H(21)   | 0.9500    |
| C(22)-C(23)   | 1.384(10) |
| C(22)-H(22)   | 0.9500    |
| C(23)-C(24)   | 1.398(8)  |
| C(23)-H(23)   | 0.9500    |
| C(24)-N(1)    | 1.319(8)  |
| C(24)-N(4)    | 1.403(7)  |
| C(25)-N(5)    | 1.350(7)  |
| C(25)-N(4)    | 1.386(7)  |
| C(25)-V(1)    | 2.224(6)  |
| C(26)-C(27)   | 1.329(8)  |



Electronic Supplementary Information for Dalton Transactions  
This journal is © The Royal Society of Chemistry 2005

|              |            |
|--------------|------------|
| C(26)-N(5)   | 1.404(7)   |
| C(26)-H(26)  | 0.9500     |
| C(27)-N(4)   | 1.389(8)   |
| C(27)-H(27)  | 0.9500     |
| C(28)-C(29)  | 1.380(8)   |
| C(28)-C(33)  | 1.401(8)   |
| C(28)-N(5)   | 1.443(7)   |
| C(29)-C(30)  | 1.408(8)   |
| C(29)-C(37)  | 1.510(8)   |
| C(30)-C(31)  | 1.368(8)   |
| C(30)-H(30)  | 0.9500     |
| C(31)-C(32)  | 1.376(8)   |
| C(31)-H(31)  | 0.9500     |
| C(32)-C(33)  | 1.389(8)   |
| C(32)-H(32)  | 0.9500     |
| C(33)-C(34)  | 1.512(8)   |
| C(34)-C(35)  | 1.520(9)   |
| C(34)-C(36)  | 1.528(11)  |
| C(34)-H(34)  | 1.0000     |
| C(35)-H(35A) | 0.9800     |
| C(35)-H(35B) | 0.9800     |
| C(35)-H(35C) | 0.9800     |
| C(36)-H(36A) | 0.9800     |
| C(36)-H(36B) | 0.9800     |
| C(36)-H(36C) | 0.9800     |
| C(37)-C(39)  | 1.517(9)   |
| C(37)-C(38)  | 1.523(9)   |
| C(37)-H(37)  | 1.0000     |
| C(38)-H(38A) | 0.9800     |
| C(38)-H(38B) | 0.9800     |
| C(38)-H(38C) | 0.9800     |
| C(39)-H(39A) | 0.9800     |
| C(39)-H(39B) | 0.9800     |
| C(39)-H(39C) | 0.9800     |
| Br(1)-V(1)   | 2.6142(11) |

Electronic Supplementary Information for Dalton Transactions  
This journal is © The Royal Society of Chemistry 2005

|                     |            |
|---------------------|------------|
| Br(2)-V(1)          | 2.5997(11) |
| N(1)-V(1)           | 2.103(5)   |
| O(1)-V(1)           | 2.162(4)   |
| O(1)-C(1A)-C(2A)    | 106.3(12)  |
| O(1)-C(1A)-H(1A1)   | 110.5      |
| C(2A)-C(1A)-H(1A1)  | 110.5      |
| O(1)-C(1A)-H(1A2)   | 110.5      |
| C(2A)-C(1A)-H(1A2)  | 110.5      |
| H(1A1)-C(1A)-H(1A2) | 108.7      |
| C(1A)-C(2A)-C(3A)   | 104.8(14)  |
| C(1A)-C(2A)-H(2A1)  | 110.8      |
| C(3A)-C(2A)-H(2A1)  | 110.8      |
| C(1A)-C(2A)-H(2A2)  | 110.8      |
| C(3A)-C(2A)-H(2A2)  | 110.8      |
| H(2A1)-C(2A)-H(2A2) | 108.9      |
| C(4)-C(3A)-C(2A)    | 107.4(11)  |
| C(4)-C(3A)-H(3A1)   | 110.2      |
| C(2A)-C(3A)-H(3A1)  | 110.2      |
| C(4)-C(3A)-H(3A2)   | 110.2      |
| C(2A)-C(3A)-H(3A2)  | 110.2      |
| H(3A1)-C(3A)-H(3A2) | 108.5      |
| H(2B1)-C(2B)-H(2B2) | 109.0      |
| O(1)-C(4)-C(3A)     | 106.4(5)   |
| O(1)-C(4)-H(4A)     | 110.4      |
| C(3A)-C(4)-H(4A)    | 110.4      |
| O(1)-C(4)-H(4B)     | 110.4      |
| C(3A)-C(4)-H(4B)    | 110.4      |
| H(4A)-C(4)-H(4B)    | 108.6      |
| N(1)-C(5)-C(21)     | 122.2(6)   |
| N(1)-C(5)-N(2)      | 113.4(5)   |
| C(21)-C(5)-N(2)     | 124.3(6)   |
| N(3)-C(6)-N(2)      | 102.3(5)   |
| N(3)-C(6)-V(1)      | 147.4(5)   |
| N(2)-C(6)-V(1)      | 110.2(4)   |

Electronic Supplementary Information for Dalton Transactions  
This journal is © The Royal Society of Chemistry 2005

|                      |           |
|----------------------|-----------|
| C(8)-C(7)-N(3)       | 108.2(6)  |
| C(8)-C(7)-H(7)       | 125.9     |
| N(3)-C(7)-H(7)       | 125.9     |
| C(7)-C(8)-N(2)       | 106.1(6)  |
| C(7)-C(8)-H(8)       | 127.0     |
| N(2)-C(8)-H(8)       | 127.0     |
| C(10)-C(9)-C(14)     | 122.0(7)  |
| C(10)-C(9)-N(3)      | 117.7(6)  |
| C(14)-C(9)-N(3)      | 120.2(6)  |
| C(9)-C(10)-C(11)     | 117.8(6)  |
| C(9)-C(10)-C(18)     | 122.5(6)  |
| C(11)-C(10)-C(18)    | 119.7(5)  |
| C(12)-C(11)-C(10)    | 121.7(7)  |
| C(12)-C(11)-H(11)    | 119.1     |
| C(10)-C(11)-H(11)    | 119.1     |
| C(13)-C(12)-C(11)    | 119.7(7)  |
| C(13)-C(12)-H(12)    | 120.1     |
| C(11)-C(12)-H(12)    | 120.1     |
| C(12)-C(13)-C(14)    | 122.5(7)  |
| C(12)-C(13)-H(13)    | 118.7     |
| C(14)-C(13)-H(13)    | 118.7     |
| C(13)-C(14)-C(9)     | 116.2(6)  |
| C(13)-C(14)-C(15)    | 123.3(7)  |
| C(9)-C(14)-C(15)     | 120.5(8)  |
| C(16A)-C(15)-C(14)   | 110.2(7)  |
| C(16A)-C(15)-C(17)   | 110.8(8)  |
| C(14)-C(15)-C(17)    | 113.7(10) |
| C(16A)-C(15)-H(15)   | 107.3     |
| C(14)-C(15)-H(15)    | 107.3     |
| C(17)-C(15)-H(15)    | 107.3     |
| C(15)-C(16A)-H(16A)  | 109.5     |
| C(15)-C(16A)-H(16B)  | 109.5     |
| H(16A)-C(16A)-H(16B) | 109.5     |
| C(15)-C(16A)-H(16C)  | 109.5     |
| H(16A)-C(16A)-H(16C) | 109.5     |

Electronic Supplementary Information for Dalton Transactions  
This journal is © The Royal Society of Chemistry 2005

|                      |          |
|----------------------|----------|
| H(16B)-C(16A)-H(16C) | 109.5    |
| C(15)-C(17)-H(17A)   | 109.5    |
| C(15)-C(17)-H(17B)   | 109.5    |
| H(17A)-C(17)-H(17B)  | 109.5    |
| C(15)-C(17)-H(17C)   | 109.5    |
| H(17A)-C(17)-H(17C)  | 109.5    |
| H(17B)-C(17)-H(17C)  | 109.5    |
| C(10)-C(18)-C(19)    | 109.7(5) |
| C(10)-C(18)-C(20)    | 112.1(5) |
| C(19)-C(18)-C(20)    | 110.8(5) |
| C(10)-C(18)-H(18)    | 108.0    |
| C(19)-C(18)-H(18)    | 108.0    |
| C(20)-C(18)-H(18)    | 108.0    |
| C(18)-C(19)-H(19A)   | 109.5    |
| C(18)-C(19)-H(19B)   | 109.5    |
| H(19A)-C(19)-H(19B)  | 109.5    |
| C(18)-C(19)-H(19C)   | 109.5    |
| H(19A)-C(19)-H(19C)  | 109.5    |
| H(19B)-C(19)-H(19C)  | 109.5    |
| C(18)-C(20)-H(20A)   | 109.5    |
| C(18)-C(20)-H(20B)   | 109.5    |
| H(20A)-C(20)-H(20B)  | 109.5    |
| C(18)-C(20)-H(20C)   | 109.5    |
| H(20A)-C(20)-H(20C)  | 109.5    |
| H(20B)-C(20)-H(20C)  | 109.5    |
| C(22)-C(21)-C(5)     | 117.6(6) |
| C(22)-C(21)-H(21)    | 121.2    |
| C(5)-C(21)-H(21)     | 121.2    |
| C(21)-C(22)-C(23)    | 121.7(6) |
| C(21)-C(22)-H(22)    | 119.2    |
| C(23)-C(22)-H(22)    | 119.2    |
| C(22)-C(23)-C(24)    | 116.1(7) |
| C(22)-C(23)-H(23)    | 121.9    |
| C(24)-C(23)-H(23)    | 121.9    |
| N(1)-C(24)-C(23)     | 123.5(6) |

Electronic Supplementary Information for Dalton Transactions  
This journal is © The Royal Society of Chemistry 2005

|                   |          |
|-------------------|----------|
| N(1)-C(24)-N(4)   | 113.2(5) |
| C(23)-C(24)-N(4)  | 123.3(6) |
| N(5)-C(25)-N(4)   | 102.6(5) |
| N(5)-C(25)-V(1)   | 145.9(4) |
| N(4)-C(25)-V(1)   | 110.6(4) |
| C(27)-C(26)-N(5)  | 107.2(5) |
| C(27)-C(26)-H(26) | 126.4    |
| N(5)-C(26)-H(26)  | 126.4    |
| C(26)-C(27)-N(4)  | 106.4(5) |
| C(26)-C(27)-H(27) | 126.8    |
| N(4)-C(27)-H(27)  | 126.8    |
| C(29)-C(28)-C(33) | 124.0(5) |
| C(29)-C(28)-N(5)  | 118.5(5) |
| C(33)-C(28)-N(5)  | 117.5(5) |
| C(28)-C(29)-C(30) | 116.8(5) |
| C(28)-C(29)-C(37) | 122.5(5) |
| C(30)-C(29)-C(37) | 120.7(5) |
| C(31)-C(30)-C(29) | 120.6(6) |
| C(31)-C(30)-H(30) | 119.7    |
| C(29)-C(30)-H(30) | 119.7    |
| C(30)-C(31)-C(32) | 120.8(6) |
| C(30)-C(31)-H(31) | 119.6    |
| C(32)-C(31)-H(31) | 119.6    |
| C(31)-C(32)-C(33) | 121.4(5) |
| C(31)-C(32)-H(32) | 119.3    |
| C(33)-C(32)-H(32) | 119.3    |
| C(32)-C(33)-C(28) | 116.3(5) |
| C(32)-C(33)-C(34) | 121.3(5) |
| C(28)-C(33)-C(34) | 122.3(5) |
| C(33)-C(34)-C(35) | 113.7(6) |
| C(33)-C(34)-C(36) | 109.5(6) |
| C(35)-C(34)-C(36) | 110.4(6) |
| C(33)-C(34)-H(34) | 107.7    |
| C(35)-C(34)-H(34) | 107.7    |
| C(36)-C(34)-H(34) | 107.7    |

Electronic Supplementary Information for Dalton Transactions  
This journal is © The Royal Society of Chemistry 2005

|                     |          |
|---------------------|----------|
| C(34)-C(35)-H(35A)  | 109.5    |
| C(34)-C(35)-H(35B)  | 109.5    |
| H(35A)-C(35)-H(35B) | 109.5    |
| C(34)-C(35)-H(35C)  | 109.5    |
| H(35A)-C(35)-H(35C) | 109.5    |
| H(35B)-C(35)-H(35C) | 109.5    |
| C(34)-C(36)-H(36A)  | 109.5    |
| C(34)-C(36)-H(36B)  | 109.5    |
| H(36A)-C(36)-H(36B) | 109.5    |
| C(34)-C(36)-H(36C)  | 109.5    |
| H(36A)-C(36)-H(36C) | 109.5    |
| H(36B)-C(36)-H(36C) | 109.5    |
| C(29)-C(37)-C(39)   | 112.4(5) |
| C(29)-C(37)-C(38)   | 109.7(5) |
| C(39)-C(37)-C(38)   | 110.6(5) |
| C(29)-C(37)-H(37)   | 108.0    |
| C(39)-C(37)-H(37)   | 108.0    |
| C(38)-C(37)-H(37)   | 108.0    |
| C(37)-C(38)-H(38A)  | 109.5    |
| C(37)-C(38)-H(38B)  | 109.5    |
| H(38A)-C(38)-H(38B) | 109.5    |
| C(37)-C(38)-H(38C)  | 109.5    |
| H(38A)-C(38)-H(38C) | 109.5    |
| H(38B)-C(38)-H(38C) | 109.5    |
| C(37)-C(39)-H(39A)  | 109.5    |
| C(37)-C(39)-H(39B)  | 109.5    |
| H(39A)-C(39)-H(39B) | 109.5    |
| C(37)-C(39)-H(39C)  | 109.5    |
| H(39A)-C(39)-H(39C) | 109.5    |
| H(39B)-C(39)-H(39C) | 109.5    |
| C(24)-N(1)-C(5)     | 118.9(5) |
| C(24)-N(1)-V(1)     | 121.2(4) |
| C(5)-N(1)-V(1)      | 119.8(4) |
| C(6)-N(2)-C(5)      | 120.8(5) |
| C(6)-N(2)-C(8)      | 111.4(6) |

Electronic Supplementary Information for Dalton Transactions  
This journal is © The Royal Society of Chemistry 2005

|                  |            |
|------------------|------------|
| C(5)-N(2)-C(8)   | 127.7(6)   |
| C(6)-N(3)-C(7)   | 112.1(6)   |
| C(6)-N(3)-C(9)   | 125.9(5)   |
| C(7)-N(3)-C(9)   | 122.0(5)   |
| C(25)-N(4)-C(27) | 111.9(5)   |
| C(25)-N(4)-C(24) | 119.6(5)   |
| C(27)-N(4)-C(24) | 128.5(5)   |
| C(25)-N(5)-C(26) | 111.8(5)   |
| C(25)-N(5)-C(28) | 124.8(4)   |
| C(26)-N(5)-C(28) | 123.2(5)   |
| C(1A)-O(1)-C(4)  | 109.3(4)   |
| C(1A)-O(1)-V(1)  | 123.8(3)   |
| C(4)-O(1)-V(1)   | 124.6(3)   |
| N(1)-V(1)-O(1)   | 177.41(18) |
| N(1)-V(1)-C(25)  | 74.28(19)  |
| O(1)-V(1)-C(25)  | 107.79(18) |
| N(1)-V(1)-C(6)   | 75.1(2)    |
| O(1)-V(1)-C(6)   | 102.8(2)   |
| C(25)-V(1)-C(6)  | 149.4(2)   |
| N(1)-V(1)-Br(2)  | 90.13(12)  |
| O(1)-V(1)-Br(2)  | 88.31(11)  |
| C(25)-V(1)-Br(2) | 90.74(14)  |
| C(6)-V(1)-Br(2)  | 89.83(14)  |
| N(1)-V(1)-Br(1)  | 91.37(12)  |
| O(1)-V(1)-Br(1)  | 90.38(11)  |
| C(25)-V(1)-Br(1) | 84.67(14)  |
| C(6)-V(1)-Br(1)  | 95.57(14)  |
| Br(2)-V(1)-Br(1) | 174.60(5)  |

---

Symmetry transformations used to generate equivalent atoms:

Table 4. Anisotropic displacement parameters ( $\text{\AA}^2 \times 10^3$ ) for **1b**. The anisotropic displacement factor exponent takes the form:  $-2\pi^2 [ h^2 a^{*2} U^{11} + \dots + 2 h k a^* b^* U^{12} ]$

|        | $U^{11}$ | $U^{22}$ | $U^{33}$ | $U^{23}$ | $U^{13}$ | $U^{12}$ |
|--------|----------|----------|----------|----------|----------|----------|
| C(1A)  | 42(4)    | 31(4)    | 45(4)    | 6(3)     | -11(3)   | 6(3)     |
| C(2A)  | 58(9)    | 49(6)    | 63(11)   | -9(6)    | -23(7)   | 4(6)     |
| C(3A)  | 71(6)    | 45(5)    | 81(6)    | 10(4)    | -20(5)   | -25(4)   |
| C(1B)  | 42(4)    | 31(4)    | 45(4)    | 6(3)     | -11(3)   | 6(3)     |
| C(2B)  | 58(9)    | 49(6)    | 63(11)   | -9(6)    | -23(7)   | 4(6)     |
| C(3B)  | 71(6)    | 45(5)    | 81(6)    | 10(4)    | -20(5)   | -25(4)   |
| C(4)   | 45(4)    | 17(3)    | 45(4)    | 3(3)     | 2(3)     | -2(3)    |
| C(5)   | 20(3)    | 27(3)    | 56(4)    | 24(3)    | 7(3)     | -1(3)    |
| C(6)   | 39(4)    | 16(3)    | 41(4)    | 9(3)     | 20(3)    | -3(3)    |
| C(7)   | 40(4)    | 29(4)    | 86(6)    | 12(4)    | 41(4)    | 2(3)     |
| C(8)   | 28(4)    | 34(4)    | 83(6)    | 24(4)    | 30(4)    | 7(3)     |
| C(9)   | 39(4)    | 22(3)    | 53(4)    | 4(3)     | 29(3)    | 9(3)     |
| C(10)  | 27(3)    | 30(3)    | 41(4)    | 7(3)     | 14(3)    | 9(3)     |
| C(11)  | 31(4)    | 42(4)    | 44(4)    | 6(3)     | 17(3)    | 3(3)     |
| C(12)  | 61(5)    | 49(5)    | 39(4)    | -6(3)    | 20(4)    | 17(4)    |
| C(13)  | 81(6)    | 53(5)    | 33(4)    | -4(4)    | 27(4)    | 21(4)    |
| C(14)  | 87(6)    | 31(4)    | 46(4)    | 12(3)    | 38(4)    | 24(4)    |
| C(15)  | 193(12)  | 23(4)    | 44(5)    | 1(3)     | 60(6)    | -2(5)    |
| C(16A) | 171(12)  | 101(8)   | 73(7)    | -18(6)   | 60(7)    | -103(8)  |
| C(17)  | 306(19)  | 37(5)    | 57(6)    | 22(4)    | 69(9)    | 62(8)    |
| C(18)  | 34(4)    | 23(3)    | 47(4)    | 10(3)    | 8(3)     | -3(3)    |
| C(19)  | 47(4)    | 39(4)    | 41(4)    | 11(3)    | 16(3)    | 5(3)     |
| C(20)  | 34(4)    | 41(4)    | 64(5)    | 18(3)    | 15(3)    | 10(3)    |
| C(21)  | 19(3)    | 32(4)    | 77(5)    | 25(4)    | 5(3)     | 1(3)     |
| C(22)  | 20(3)    | 39(4)    | 65(5)    | 22(4)    | -18(3)   | -9(3)    |
| C(23)  | 41(4)    | 27(3)    | 53(4)    | 8(3)     | -11(3)   | -6(3)    |
| C(24)  | 24(3)    | 21(3)    | 40(4)    | 11(3)    | -7(3)    | -5(2)    |
| C(25)  | 19(3)    | 18(3)    | 30(3)    | 2(2)     | -1(2)    | -4(2)    |
| C(26)  | 39(4)    | 23(3)    | 30(3)    | -7(2)    | 7(3)     | -5(3)    |
| C(27)  | 33(4)    | 25(3)    | 33(3)    | -3(3)    | -4(3)    | -10(3)   |



Electronic Supplementary Information for Dalton Transactions  
This journal is © The Royal Society of Chemistry 2005

|       |       |       |       |       |       |        |
|-------|-------|-------|-------|-------|-------|--------|
| C(28) | 28(3) | 14(3) | 24(3) | -2(2) | 4(2)  | 4(2)   |
| C(29) | 30(3) | 20(3) | 32(3) | 0(2)  | 9(3)  | 1(2)   |
| C(30) | 26(3) | 33(3) | 42(4) | -1(3) | 8(3)  | -4(3)  |
| C(31) | 22(3) | 35(3) | 34(3) | 2(3)  | -4(3) | 5(3)   |
| C(32) | 34(4) | 28(3) | 28(3) | 5(2)  | 6(3)  | 9(3)   |
| C(33) | 27(3) | 19(3) | 38(3) | 2(2)  | 8(3)  | 1(2)   |
| C(34) | 23(3) | 47(4) | 59(5) | 27(3) | 3(3)  | 2(3)   |
| C(35) | 40(4) | 56(5) | 78(6) | 36(4) | 28(4) | 18(4)  |
| C(36) | 79(6) | 54(5) | 67(5) | 20(4) | -6(5) | -38(5) |
| C(37) | 32(3) | 36(4) | 26(3) | 6(3)  | 4(3)  | -7(3)  |
| C(38) | 62(5) | 49(4) | 30(4) | 5(3)  | 13(3) | -4(4)  |
| C(39) | 59(5) | 39(4) | 43(4) | 9(3)  | 9(4)  | -13(4) |
| Br(1) | 34(1) | 33(1) | 42(1) | 10(1) | 4(1)  | 0(1)   |
| Br(2) | 45(1) | 28(1) | 55(1) | 6(1)  | 17(1) | -2(1)  |
| N(1)  | 17(2) | 19(2) | 39(3) | 11(2) | 0(2)  | -3(2)  |
| N(2)  | 28(3) | 18(3) | 63(4) | 16(2) | 19(3) | 2(2)   |
| N(3)  | 34(3) | 25(3) | 62(4) | 14(3) | 32(3) | 6(2)   |
| N(4)  | 24(3) | 20(2) | 28(3) | -1(2) | -7(2) | -5(2)  |
| N(5)  | 23(3) | 16(2) | 26(2) | -2(2) | 2(2)  | -3(2)  |
| O(1)  | 33(2) | 23(2) | 32(2) | 5(2)  | 1(2)  | -2(2)  |
| V(1)  | 23(1) | 17(1) | 31(1) | 4(1)  | 3(1)  | 0(1)   |

---

Electronic Supplementary Information for Dalton Transactions  
This journal is © The Royal Society of Chemistry 2005

### Structural Data for 2b

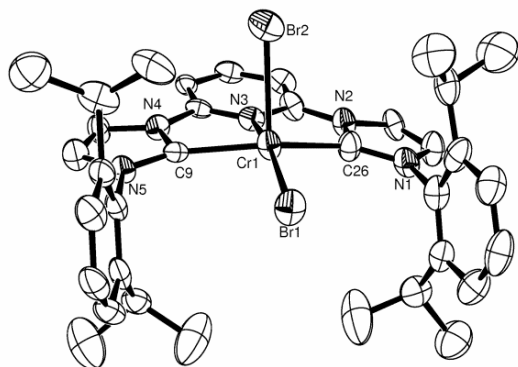

Table 5. Crystal data and structure refinement for **2b**.

|                                   |                                                                                                                                                   |
|-----------------------------------|---------------------------------------------------------------------------------------------------------------------------------------------------|
| Identification code               | 2b                                                                                                                                                |
| Empirical formula                 | C <sub>82</sub> H <sub>106</sub> Br <sub>4</sub> Cl <sub>10</sub> Cr <sub>2</sub> N <sub>10</sub> O <sub>3</sub>                                  |
| Formula weight                    | 1703.41                                                                                                                                           |
| Temperature                       | 120(2) K                                                                                                                                          |
| Wavelength                        | 0.71073 Å                                                                                                                                         |
| Crystal system                    | Trigonal                                                                                                                                          |
| Space group                       | R -3                                                                                                                                              |
| Unit cell dimensions              | a = 34.5630(7) Å                      α = 90°<br>b = 34.5630(7) Å                      β = 90°<br>c = 41.0813(15) Å                      γ = 120° |
| Volume                            | 42501(2) Å <sup>3</sup>                                                                                                                           |
| Z                                 | 18                                                                                                                                                |
| Density (calculated)              | 1.198 Mg/m <sup>3</sup>                                                                                                                           |
| Absorption coefficient            | 1.968 mm <sup>-1</sup>                                                                                                                            |
| F(000)                            | 15840                                                                                                                                             |
| Crystal size                      | 0.20 x 0.08 x 0.04 mm <sup>3</sup>                                                                                                                |
| Theta range for data collection   | 2.98 to 24.69°                                                                                                                                    |
| Index ranges                      | -40 ≤ h ≤ 36, -40 ≤ k ≤ 31, -48 ≤ l ≤ 48                                                                                                          |
| Reflections collected             | 82975                                                                                                                                             |
| Independent reflections           | 15994 [R(int) = 0.1702]                                                                                                                           |
| Completeness to theta = 24.69°    | 99.4 %                                                                                                                                            |
| Absorption correction             | Semi-empirical from equivalents                                                                                                                   |
| Max. and min. transmission        | 0.9254 and 0.6943                                                                                                                                 |
| Refinement method                 | Full-matrix least-squares on F <sup>2</sup>                                                                                                       |
| Data / restraints / parameters    | 15994 / 0 / 885                                                                                                                                   |
| Goodness-of-fit on F <sup>2</sup> | 1.038                                                                                                                                             |
| Final R indices [I > 2σ(I)]       | R1 = 0.0998, wR2 = 0.1998                                                                                                                         |
| R indices (all data)              | R1 = 0.2029, wR2 = 0.2395                                                                                                                         |
| Largest diff. peak and hole       | 1.669 and -0.556 e.Å <sup>-3</sup>                                                                                                                |

Table 6. Atomic coordinates ( $\times 10^4$ ) and equivalent isotropic displacement parameters ( $\text{\AA}^2 \times 10^3$ ) for **2b**.  $U(\text{eq})$  is defined as one third of the trace of the orthogonalized  $U^{ij}$  tensor.

|       | x        | y       | z       | $U(\text{eq})$ |
|-------|----------|---------|---------|----------------|
| C(2)  | 1906(4)  | 3874(4) | 3098(3) | 57(3)          |
| C(3)  | 1804(4)  | 4547(4) | 3162(3) | 68(4)          |
| C(1)  | 1170(3)  | 4181(3) | 1827(2) | 25(2)          |
| C(4)  | 2491(3)  | 4836(3) | 2512(2) | 27(2)          |
| C(5)  | 820(3)   | 4224(3) | 1706(2) | 30(2)          |
| C(6)  | 499(3)   | 3876(3) | 1519(2) | 31(2)          |
| C(7)  | 1561(3)  | 4880(3) | 2163(2) | 28(2)          |
| C(8)  | 1925(3)  | 5051(3) | 2348(2) | 29(2)          |
| C(9)  | 8(3)     | 3375(3) | 225(2)  | 34(2)          |
| C(10) | -900(4)  | 3072(3) | -651(2) | 39(3)          |
| C(11) | 1843(3)  | 4402(3) | 2129(2) | 28(2)          |
| C(12) | -1178(4) | 2791(4) | 372(3)  | 52(3)          |
| C(13) | 344(4)   | 1737(4) | 22(3)   | 45(3)          |
| C(14) | 129(3)   | 4042(3) | 443(2)  | 38(3)          |
| C(15) | 676(3)   | 3774(3) | 557(2)  | 31(2)          |
| C(16) | 899(3)   | 2470(4) | 1491(2) | 40(3)          |
| C(17) | -244(3)  | 3870(3) | 261(2)  | 42(3)          |
| C(18) | 2409(3)  | 4609(3) | 2806(2) | 33(2)          |
| C(19) | 1336(3)  | 4089(3) | 861(2)  | 39(3)          |
| C(20) | 1887(4)  | 2585(3) | 1603(2) | 40(3)          |
| C(21) | 2910(3)  | 5156(3) | 2403(2) | 30(2)          |
| C(22) | 966(3)   | 4112(3) | 761(2)  | 29(2)          |
| C(23) | 1144(4)  | 2415(4) | 2340(3) | 62(3)          |
| C(24) | -1320(4) | 2759(4) | -544(3) | 46(3)          |
| C(25) | 1107(3)  | 3438(3) | 552(3)  | 38(3)          |
| C(26) | 770(3)   | 2777(3) | 218(2)  | 39(3)          |
| C(27) | -1413(4) | 2663(3) | -221(3) | 44(3)          |
| C(28) | 1348(3)  | 2631(4) | 211(3)  | 45(3)          |
| C(29) | 2192(5)  | 2480(4) | 1740(3) | 70(4)          |
| C(30) | 1479(3)  | 2990(3) | 402(3)  | 38(3)          |

Electronic Supplementary Information for Dalton Transactions  
This journal is © The Royal Society of Chemistry 2005

|       |          |         |         |       |
|-------|----------|---------|---------|-------|
| C(31) | 1525(4)  | 2459(4) | 2134(3) | 45(3) |
| C(32) | 885(3)   | 3483(3) | 1592(2) | 27(2) |
| C(33) | 1580(3)  | 2597(3) | 1808(2) | 37(3) |
| C(34) | 1411(3)  | 3747(3) | 761(2)  | 38(3) |
| C(35) | -1282(4) | 2319(4) | 452(3)  | 68(4) |
| C(36) | 2781(4)  | 4715(3) | 2996(2) | 42(3) |
| C(37) | 698(4)   | 2704(3) | 1423(2) | 42(3) |
| C(38) | -557(3)  | 3307(3) | -437(2) | 37(3) |
| C(39) | 3312(4)  | 5352(4) | 1878(3) | 69(4) |
| C(40) | 250(3)   | 1693(4) | 375(3)  | 49(3) |
| C(41) | 102(4)   | 1377(4) | -189(3) | 55(3) |
| C(42) | -1075(4) | 2895(3) | 14(2)   | 38(3) |
| C(43) | 3207(4)  | 5032(4) | 2894(3) | 46(3) |
| C(44) | 666(3)   | 2134(3) | -121(3) | 41(3) |
| C(45) | 525(3)   | 3494(3) | 1460(2) | 31(2) |
| C(46) | 1328(3)  | 3142(3) | 1730(2) | 31(2) |
| C(47) | 750(3)   | 2204(3) | -450(3) | 42(3) |
| C(48) | 2985(3)  | 5399(4) | 2082(2) | 45(3) |
| C(49) | 3131(4)  | 5894(4) | 2136(3) | 65(4) |
| C(50) | 2361(4)  | 3077(4) | 1147(3) | 76(4) |
| C(51) | -654(3)  | 3211(3) | -104(2) | 32(2) |
| C(52) | -97(4)   | 3634(3) | -552(2) | 42(3) |
| C(53) | 504(4)   | 1835(4) | -652(3) | 52(3) |
| C(54) | 191(4)   | 1432(4) | -520(3) | 57(3) |
| C(55) | 521(4)   | 1539(5) | 550(3)  | 86(4) |
| C(56) | 1912(4)  | 2698(4) | 1240(2) | 46(3) |
| C(57) | -238(4)  | 1404(4) | 458(3)  | 73(4) |
| C(58) | 1835(5)  | 2355(5) | 2257(3) | 76(4) |
| C(59) | 1305(5)  | 2660(5) | 2662(3) | 84(4) |
| C(60) | 1777(4)  | 2284(4) | 1036(3) | 64(4) |
| C(61) | -1558(4) | 2866(4) | 486(3)  | 67(4) |
| C(62) | 2159(5)  | 2359(5) | 2061(3) | 80(4) |
| C(63) | 1947(3)  | 4297(4) | 2929(2) | 43(3) |
| C(64) | 95(5)    | 3424(4) | -773(4) | 97(5) |
| C(65) | -82(4)   | 4032(4) | -741(4) | 91(5) |

Electronic Supplementary Information for Dalton Transactions  
This journal is © The Royal Society of Chemistry 2005

|       |          |          |         |         |
|-------|----------|----------|---------|---------|
| C(66) | 1085(4)  | 2650(4)  | -598(3) | 51(3)   |
| C(67) | 3256(3)  | 5244(3)  | 2605(2) | 34(2)   |
| C(68) | 1366(4)  | 2630(4)  | -871(3) | 76(4)   |
| C(69) | 848(5)   | 2895(5)  | -713(4) | 110(6)  |
| C(70) | 805(6)   | 1925(6)  | 2402(5) | 154(9)  |
| C(71) | 3687(6)  | 4487(5)  | 3594(4) | 116(6)  |
| C(72) | 4065(5)  | 4877(5)  | 3440(4) | 85(4)   |
| C(73) | 3587(9)  | 4662(7)  | 3871(5) | 177(11) |
| C(74) | 3764(8)  | 5126(7)  | 3815(5) | 165(10) |
| C(75) | 2727(5)  | 5892(5)  | 3059(4) | 94(5)   |
| C(76) | 2654(6)  | 5894(6)  | 3415(4) | 117(6)  |
| C(77) | 2253(6)  | 5931(8)  | 3454(5) | 164(11) |
| C(78) | 2045(6)  | 5831(5)  | 3144(4) | 98(5)   |
| C(79) | 9394(8)  | 2653(7)  | 1703(5) | 153(8)  |
| C(80) | 9312(12) | 2033(11) | 1922(8) | 225(13) |
| C(81) | 8926(11) | 1911(11) | 1796(8) | 232(13) |
| C(82) | 8929(10) | 2342(10) | 1629(7) | 216(12) |
| N(1)  | 914(3)   | 2502(3)  | 98(2)   | 40(2)   |
| N(2)  | 1125(3)  | 3078(3)  | 408(2)  | 38(2)   |
| N(3)  | 736(3)   | 3440(2)  | 457(2)  | 31(2)   |
| N(4)  | 285(3)   | 3745(2)  | 423(2)  | 32(2)   |
| N(5)  | -306(2)  | 3470(2)  | 131(2)  | 31(2)   |
| N(6)  | 1203(2)  | 3818(2)  | 1768(2) | 26(2)   |
| N(7)  | 1512(2)  | 4490(2)  | 2027(2) | 25(2)   |
| N(8)  | 965(2)   | 3120(2)  | 1568(2) | 29(2)   |
| N(9)  | 2095(2)  | 4757(2)  | 2326(2) | 27(2)   |
| N(10) | 1274(3)  | 2733(3)  | 1677(2) | 38(2)   |
| O(1)  | 2335(3)  | 5810(3)  | 2904(2) | 88(3)   |
| O(2)  | 4035(3)  | 5259(3)  | 3534(2) | 82(3)   |
| O(3)  | 9657(8)  | 2422(9)  | 1799(6) | 255(9)  |
| Cr(1) | 227(1)   | 2900(1)  | 215(1)  | 34(1)   |
| Cr(2) | 1763(1)  | 3802(1)  | 1921(1) | 28(1)   |
| Br(1) | -277(1)  | 2375(1)  | -196(1) | 47(1)   |
| Br(2) | -125(1)  | 2560(1)  | 793(1)  | 50(1)   |
| Br(3) | 2205(1)  | 4189(1)  | 1385(1) | 40(1)   |





Table 7. Bond lengths [ $\text{\AA}$ ] and angles [ $^\circ$ ] for **2b**.

---

|             |           |
|-------------|-----------|
| C(2)-C(63)  | 1.559(14) |
| C(3)-C(63)  | 1.526(15) |
| C(1)-N(6)   | 1.339(11) |
| C(1)-C(5)   | 1.384(12) |
| C(1)-N(7)   | 1.396(11) |
| C(4)-C(21)  | 1.384(12) |
| C(4)-C(18)  | 1.393(12) |
| C(4)-N(9)   | 1.466(11) |
| C(5)-C(6)   | 1.392(12) |
| C(6)-C(45)  | 1.389(12) |
| C(7)-C(8)   | 1.330(12) |
| C(7)-N(7)   | 1.391(11) |
| C(8)-N(9)   | 1.408(11) |
| C(9)-N(5)   | 1.340(11) |
| C(9)-N(4)   | 1.409(12) |
| C(9)-Cr(1)  | 2.125(10) |
| C(10)-C(38) | 1.369(13) |
| C(10)-C(24) | 1.377(14) |
| C(11)-N(9)  | 1.361(11) |
| C(11)-N(7)  | 1.386(11) |
| C(11)-Cr(2) | 2.129(9)  |
| C(12)-C(42) | 1.512(14) |
| C(12)-C(35) | 1.520(15) |
| C(12)-C(61) | 1.534(15) |
| C(13)-C(44) | 1.392(14) |
| C(13)-C(41) | 1.400(15) |
| C(13)-C(40) | 1.475(15) |
| C(14)-C(17) | 1.343(13) |
| C(14)-N(4)  | 1.380(11) |
| C(15)-N(3)  | 1.336(11) |
| C(15)-C(22) | 1.377(12) |
| C(15)-N(4)  | 1.417(11) |
| C(16)-C(37) | 1.334(13) |

Electronic Supplementary Information for Dalton Transactions  
This journal is © The Royal Society of Chemistry 2005

|             |           |
|-------------|-----------|
| C(16)-N(10) | 1.382(12) |
| C(17)-N(5)  | 1.392(11) |
| C(18)-C(36) | 1.387(13) |
| C(18)-C(63) | 1.499(13) |
| C(19)-C(22) | 1.382(13) |
| C(19)-C(34) | 1.394(13) |
| C(20)-C(33) | 1.371(13) |
| C(20)-C(29) | 1.394(15) |
| C(20)-C(56) | 1.532(13) |
| C(21)-C(67) | 1.359(13) |
| C(21)-C(48) | 1.516(13) |
| C(23)-C(31) | 1.509(15) |
| C(23)-C(59) | 1.515(16) |
| C(23)-C(70) | 1.525(19) |
| C(24)-C(27) | 1.368(14) |
| C(25)-N(3)  | 1.343(11) |
| C(25)-C(34) | 1.363(13) |
| C(25)-N(2)  | 1.407(12) |
| C(26)-N(1)  | 1.367(12) |
| C(26)-N(2)  | 1.387(12) |
| C(26)-Cr(1) | 2.122(10) |
| C(27)-C(42) | 1.415(13) |
| C(28)-C(30) | 1.339(13) |
| C(28)-N(1)  | 1.410(12) |
| C(29)-C(62) | 1.370(16) |
| C(30)-N(2)  | 1.401(12) |
| C(31)-C(58) | 1.384(15) |
| C(31)-C(33) | 1.404(13) |
| C(32)-N(6)  | 1.342(11) |
| C(32)-C(45) | 1.375(12) |
| C(32)-N(8)  | 1.415(11) |
| C(33)-N(10) | 1.455(12) |
| C(36)-C(43) | 1.389(14) |
| C(37)-N(8)  | 1.394(12) |
| C(38)-C(51) | 1.409(13) |

Electronic Supplementary Information for Dalton Transactions  
This journal is © The Royal Society of Chemistry 2005

|             |           |
|-------------|-----------|
| C(38)-C(52) | 1.492(14) |
| C(39)-C(48) | 1.482(14) |
| C(40)-C(55) | 1.477(15) |
| C(40)-C(57) | 1.507(15) |
| C(41)-C(54) | 1.387(16) |
| C(42)-C(51) | 1.399(13) |
| C(43)-C(67) | 1.360(13) |
| C(44)-C(47) | 1.378(14) |
| C(44)-N(1)  | 1.440(12) |
| C(46)-N(10) | 1.348(11) |
| C(46)-N(8)  | 1.391(11) |
| C(46)-Cr(2) | 2.156(10) |
| C(47)-C(53) | 1.397(14) |
| C(47)-C(66) | 1.518(14) |
| C(48)-C(49) | 1.537(15) |
| C(50)-C(56) | 1.495(15) |
| C(51)-N(5)  | 1.452(11) |
| C(52)-C(64) | 1.509(15) |
| C(52)-C(65) | 1.557(15) |
| C(53)-C(54) | 1.378(15) |
| C(56)-C(60) | 1.516(15) |
| C(58)-C(62) | 1.375(17) |
| C(66)-C(68) | 1.508(15) |
| C(66)-C(69) | 1.516(16) |
| C(71)-C(73) | 1.41(2)   |
| C(71)-C(72) | 1.472(19) |
| C(72)-O(2)  | 1.430(15) |
| C(73)-C(74) | 1.42(2)   |
| C(74)-O(2)  | 1.410(16) |
| C(75)-O(1)  | 1.389(16) |
| C(75)-C(76) | 1.48(2)   |
| C(76)-C(77) | 1.46(2)   |
| C(77)-C(78) | 1.41(2)   |
| C(78)-O(1)  | 1.434(16) |
| C(79)-C(82) | 1.45(3)   |

Electronic Supplementary Information for Dalton Transactions  
This journal is © The Royal Society of Chemistry 2005

|             |            |
|-------------|------------|
| C(79)-O(3)  | 1.53(3)    |
| C(80)-C(81) | 1.29(3)    |
| C(80)-O(3)  | 1.37(3)    |
| C(81)-C(82) | 1.63(3)    |
| N(3)-Cr(1)  | 2.070(7)   |
| N(6)-Cr(2)  | 2.059(7)   |
| Cr(1)-Br(1) | 2.4516(18) |
| Cr(1)-Br(2) | 2.657(2)   |
| Cr(2)-Br(4) | 2.4421(17) |
| Cr(2)-Br(3) | 2.6312(17) |

|                   |           |
|-------------------|-----------|
| N(6)-C(1)-C(5)    | 121.8(8)  |
| N(6)-C(1)-N(7)    | 112.7(7)  |
| C(5)-C(1)-N(7)    | 125.5(9)  |
| C(21)-C(4)-C(18)  | 124.3(8)  |
| C(21)-C(4)-N(9)   | 119.3(8)  |
| C(18)-C(4)-N(9)   | 116.1(8)  |
| C(1)-C(5)-C(6)    | 117.8(9)  |
| C(45)-C(6)-C(5)   | 121.0(9)  |
| C(8)-C(7)-N(7)    | 106.8(8)  |
| C(7)-C(8)-N(9)    | 106.7(8)  |
| N(5)-C(9)-N(4)    | 102.1(8)  |
| N(5)-C(9)-Cr(1)   | 146.0(7)  |
| N(4)-C(9)-Cr(1)   | 111.7(6)  |
| C(38)-C(10)-C(24) | 121.6(10) |
| N(9)-C(11)-N(7)   | 102.1(7)  |
| N(9)-C(11)-Cr(2)  | 146.0(7)  |
| N(7)-C(11)-Cr(2)  | 111.9(6)  |
| C(42)-C(12)-C(35) | 111.6(9)  |
| C(42)-C(12)-C(61) | 112.1(9)  |
| C(35)-C(12)-C(61) | 110.6(10) |
| C(44)-C(13)-C(41) | 116.2(10) |
| C(44)-C(13)-C(40) | 122.9(10) |
| C(41)-C(13)-C(40) | 120.9(11) |
| C(17)-C(14)-N(4)  | 106.4(9)  |

Electronic Supplementary Information for Dalton Transactions  
This journal is © The Royal Society of Chemistry 2005

|                   |           |
|-------------------|-----------|
| N(3)-C(15)-C(22)  | 124.0(9)  |
| N(3)-C(15)-N(4)   | 111.9(8)  |
| C(22)-C(15)-N(4)  | 124.1(9)  |
| C(37)-C(16)-N(10) | 108.7(9)  |
| C(14)-C(17)-N(5)  | 107.0(9)  |
| C(36)-C(18)-C(4)  | 116.1(9)  |
| C(36)-C(18)-C(63) | 121.0(9)  |
| C(4)-C(18)-C(63)  | 122.7(8)  |
| C(22)-C(19)-C(34) | 122.1(9)  |
| C(33)-C(20)-C(29) | 117.2(9)  |
| C(33)-C(20)-C(56) | 122.4(9)  |
| C(29)-C(20)-C(56) | 120.4(9)  |
| C(67)-C(21)-C(4)  | 115.9(8)  |
| C(67)-C(21)-C(48) | 121.2(9)  |
| C(4)-C(21)-C(48)  | 122.9(8)  |
| C(15)-C(22)-C(19) | 115.7(9)  |
| C(31)-C(23)-C(59) | 112.0(11) |
| C(31)-C(23)-C(70) | 110.6(11) |
| C(59)-C(23)-C(70) | 109.9(12) |
| C(27)-C(24)-C(10) | 121.9(10) |
| N(3)-C(25)-C(34)  | 122.9(9)  |
| N(3)-C(25)-N(2)   | 110.3(8)  |
| C(34)-C(25)-N(2)  | 126.8(9)  |
| N(1)-C(26)-N(2)   | 103.4(8)  |
| N(1)-C(26)-Cr(1)  | 143.6(7)  |
| N(2)-C(26)-Cr(1)  | 113.0(7)  |
| C(24)-C(27)-C(42) | 119.8(10) |
| C(30)-C(28)-N(1)  | 107.5(9)  |
| C(62)-C(29)-C(20) | 120.7(11) |
| C(28)-C(30)-N(2)  | 106.5(9)  |
| C(58)-C(31)-C(33) | 116.4(10) |
| C(58)-C(31)-C(23) | 121.3(10) |
| C(33)-C(31)-C(23) | 122.3(9)  |
| N(6)-C(32)-C(45)  | 123.5(8)  |
| N(6)-C(32)-N(8)   | 111.3(8)  |

Electronic Supplementary Information for Dalton Transactions  
This journal is © The Royal Society of Chemistry 2005

|                   |           |
|-------------------|-----------|
| C(45)-C(32)-N(8)  | 125.2(8)  |
| C(20)-C(33)-C(31) | 123.5(9)  |
| C(20)-C(33)-N(10) | 118.7(9)  |
| C(31)-C(33)-N(10) | 117.7(9)  |
| C(25)-C(34)-C(19) | 116.9(10) |
| C(18)-C(36)-C(43) | 121.0(9)  |
| C(16)-C(37)-N(8)  | 105.0(9)  |
| C(10)-C(38)-C(51) | 116.5(10) |
| C(10)-C(38)-C(52) | 121.8(10) |
| C(51)-C(38)-C(52) | 121.6(9)  |
| C(13)-C(40)-C(55) | 111.5(9)  |
| C(13)-C(40)-C(57) | 114.2(10) |
| C(55)-C(40)-C(57) | 110.5(10) |
| C(54)-C(41)-C(13) | 119.6(11) |
| C(51)-C(42)-C(27) | 116.5(9)  |
| C(51)-C(42)-C(12) | 123.6(9)  |
| C(27)-C(42)-C(12) | 119.9(10) |
| C(67)-C(43)-C(36) | 119.1(9)  |
| C(47)-C(44)-C(13) | 125.6(10) |
| C(47)-C(44)-N(1)  | 118.5(10) |
| C(13)-C(44)-N(1)  | 115.8(10) |
| C(32)-C(45)-C(6)  | 116.6(9)  |
| N(10)-C(46)-N(8)  | 102.7(8)  |
| N(10)-C(46)-Cr(2) | 145.8(7)  |
| N(8)-C(46)-Cr(2)  | 111.2(6)  |
| C(44)-C(47)-C(53) | 116.3(10) |
| C(44)-C(47)-C(66) | 123.9(10) |
| C(53)-C(47)-C(66) | 119.8(10) |
| C(39)-C(48)-C(21) | 111.1(9)  |
| C(39)-C(48)-C(49) | 111.1(9)  |
| C(21)-C(48)-C(49) | 111.3(9)  |
| C(42)-C(51)-C(38) | 123.7(9)  |
| C(42)-C(51)-N(5)  | 117.8(8)  |
| C(38)-C(51)-N(5)  | 118.3(9)  |
| C(38)-C(52)-C(64) | 112.5(9)  |

Electronic Supplementary Information for Dalton Transactions  
This journal is © The Royal Society of Chemistry 2005

|                   |           |
|-------------------|-----------|
| C(38)-C(52)-C(65) | 112.3(9)  |
| C(64)-C(52)-C(65) | 107.2(10) |
| C(54)-C(53)-C(47) | 120.1(11) |
| C(53)-C(54)-C(41) | 122.1(11) |
| C(50)-C(56)-C(60) | 112.5(10) |
| C(50)-C(56)-C(20) | 111.9(10) |
| C(60)-C(56)-C(20) | 110.2(9)  |
| C(62)-C(58)-C(31) | 121.1(11) |
| C(29)-C(62)-C(58) | 120.6(11) |
| C(18)-C(63)-C(3)  | 109.5(9)  |
| C(18)-C(63)-C(2)  | 112.9(9)  |
| C(3)-C(63)-C(2)   | 110.4(8)  |
| C(68)-C(66)-C(47) | 115.6(10) |
| C(68)-C(66)-C(69) | 109.6(11) |
| C(47)-C(66)-C(69) | 110.0(9)  |
| C(21)-C(67)-C(43) | 123.5(9)  |
| C(73)-C(71)-C(72) | 104.5(14) |
| O(2)-C(72)-C(71)  | 106.7(12) |
| C(74)-C(73)-C(71) | 107.1(16) |
| O(2)-C(74)-C(73)  | 110.1(15) |
| O(1)-C(75)-C(76)  | 107.5(13) |
| C(77)-C(76)-C(75) | 106.1(15) |
| C(78)-C(77)-C(76) | 105.6(15) |
| C(77)-C(78)-O(1)  | 110.4(15) |
| C(82)-C(79)-O(3)  | 113(2)    |
| C(81)-C(80)-O(3)  | 115(3)    |
| C(80)-C(81)-C(82) | 110(3)    |
| C(79)-C(82)-C(81) | 95(2)     |
| C(26)-N(1)-C(28)  | 111.1(8)  |
| C(26)-N(1)-C(44)  | 125.1(8)  |
| C(28)-N(1)-C(44)  | 123.8(8)  |
| C(26)-N(2)-C(30)  | 111.5(8)  |
| C(26)-N(2)-C(25)  | 119.2(8)  |
| C(30)-N(2)-C(25)  | 129.0(8)  |
| C(15)-N(3)-C(25)  | 118.4(8)  |

Electronic Supplementary Information for Dalton Transactions  
This journal is © The Royal Society of Chemistry 2005

|                   |           |
|-------------------|-----------|
| C(15)-N(3)-Cr(1)  | 119.9(6)  |
| C(25)-N(3)-Cr(1)  | 121.2(6)  |
| C(14)-N(4)-C(9)   | 111.6(8)  |
| C(14)-N(4)-C(15)  | 129.6(8)  |
| C(9)-N(4)-C(15)   | 118.7(8)  |
| C(9)-N(5)-C(17)   | 112.9(8)  |
| C(9)-N(5)-C(51)   | 124.4(8)  |
| C(17)-N(5)-C(51)  | 122.6(8)  |
| C(1)-N(6)-C(32)   | 119.2(8)  |
| C(1)-N(6)-Cr(2)   | 119.5(6)  |
| C(32)-N(6)-Cr(2)  | 121.1(6)  |
| C(11)-N(7)-C(7)   | 112.2(7)  |
| C(11)-N(7)-C(1)   | 119.1(7)  |
| C(7)-N(7)-C(1)    | 128.6(8)  |
| C(46)-N(8)-C(37)  | 111.9(8)  |
| C(46)-N(8)-C(32)  | 119.4(8)  |
| C(37)-N(8)-C(32)  | 128.4(8)  |
| C(11)-N(9)-C(8)   | 112.2(7)  |
| C(11)-N(9)-C(4)   | 126.6(7)  |
| C(8)-N(9)-C(4)    | 121.1(7)  |
| C(46)-N(10)-C(16) | 111.7(8)  |
| C(46)-N(10)-C(33) | 122.4(8)  |
| C(16)-N(10)-C(33) | 125.9(8)  |
| C(75)-O(1)-C(78)  | 108.0(12) |
| C(74)-O(2)-C(72)  | 105.2(12) |
| C(80)-O(3)-C(79)  | 99(2)     |
| N(3)-Cr(1)-C(26)  | 74.9(4)   |
| N(3)-Cr(1)-C(9)   | 76.3(4)   |
| C(26)-Cr(1)-C(9)  | 147.9(4)  |
| N(3)-Cr(1)-Br(1)  | 165.1(2)  |
| C(26)-Cr(1)-Br(1) | 103.1(3)  |
| C(9)-Cr(1)-Br(1)  | 101.0(3)  |
| N(3)-Cr(1)-Br(2)  | 88.0(2)   |
| C(26)-Cr(1)-Br(2) | 99.3(3)   |
| C(9)-Cr(1)-Br(2)  | 93.7(2)   |



Electronic Supplementary Information for Dalton Transactions  
This journal is © The Royal Society of Chemistry 2005

|                   |           |
|-------------------|-----------|
| Br(1)-Cr(1)-Br(2) | 106.82(7) |
| N(6)-Cr(2)-C(11)  | 76.2(3)   |
| N(6)-Cr(2)-C(46)  | 75.6(3)   |
| C(11)-Cr(2)-C(46) | 149.2(3)  |
| N(6)-Cr(2)-Br(4)  | 166.1(2)  |
| C(11)-Cr(2)-Br(4) | 101.9(3)  |
| C(46)-Cr(2)-Br(4) | 102.4(2)  |
| N(6)-Cr(2)-Br(3)  | 92.7(2)   |
| C(11)-Cr(2)-Br(3) | 94.6(2)   |
| C(46)-Cr(2)-Br(3) | 98.9(2)   |
| Br(4)-Cr(2)-Br(3) | 101.26(6) |

---

Symmetry transformations used to generate equivalent atoms:

Table 8. Anisotropic displacement parameters ( $\text{\AA}^2 \times 10^3$ ) for **2b**. The anisotropic displacement factor exponent takes the form:  $-2\pi^2 [ h^2 a^{*2} U^{11} + \dots + 2 h k a^* b^* U^{12} ]$

|       | $U^{11}$ | $U^{22}$ | $U^{33}$ | $U^{23}$ | $U^{13}$ | $U^{12}$ |
|-------|----------|----------|----------|----------|----------|----------|
| C(2)  | 80(9)    | 58(8)    | 40(7)    | 9(6)     | 21(6)    | 40(7)    |
| C(3)  | 52(8)    | 58(8)    | 94(10)   | 35(7)    | 30(7)    | 28(7)    |
| C(1)  | 12(5)    | 33(6)    | 26(5)    | 5(4)     | 5(4)     | 8(5)     |
| C(4)  | 34(6)    | 26(5)    | 23(5)    | -4(4)    | -6(5)    | 15(5)    |
| C(5)  | 26(6)    | 33(6)    | 33(6)    | -6(5)    | 4(5)     | 15(5)    |
| C(6)  | 28(6)    | 29(6)    | 34(6)    | 10(5)    | -1(5)    | 12(5)    |
| C(7)  | 28(6)    | 36(6)    | 25(5)    | 2(5)     | 0(4)     | 19(5)    |
| C(8)  | 35(6)    | 20(5)    | 31(5)    | -6(4)    | -4(5)    | 14(5)    |
| C(9)  | 41(6)    | 47(7)    | 22(5)    | 7(5)     | 5(5)     | 27(6)    |
| C(10) | 46(7)    | 42(7)    | 29(6)    | 1(5)     | -10(5)   | 21(6)    |
| C(11) | 26(5)    | 37(6)    | 17(5)    | 3(5)     | 6(4)     | 14(5)    |
| C(12) | 41(7)    | 54(8)    | 41(7)    | -7(6)    | -25(6)   | 10(6)    |
| C(13) | 36(7)    | 57(8)    | 50(7)    | -17(6)   | -7(6)    | 30(6)    |
| C(14) | 48(7)    | 31(6)    | 42(6)    | -9(5)    | -14(5)   | 25(6)    |
| C(15) | 32(6)    | 36(6)    | 19(5)    | 0(5)     | -9(4)    | 13(5)    |
| C(16) | 36(6)    | 36(6)    | 41(6)    | -11(5)   | -11(5)   | 12(6)    |
| C(17) | 48(7)    | 40(7)    | 43(6)    | -20(5)   | -22(6)   | 25(6)    |
| C(18) | 28(6)    | 32(6)    | 33(6)    | -2(5)    | -4(5)    | 11(5)    |
| C(19) | 43(7)    | 32(6)    | 30(6)    | 0(5)     | -7(5)    | 8(5)     |
| C(20) | 66(8)    | 51(7)    | 30(6)    | -2(5)    | 3(5)     | 49(6)    |
| C(21) | 25(6)    | 34(6)    | 28(5)    | 2(5)     | 0(5)     | 12(5)    |
| C(22) | 39(6)    | 27(6)    | 23(5)    | -3(4)    | -5(5)    | 17(5)    |
| C(23) | 90(10)   | 76(9)    | 40(7)    | 13(7)    | 8(7)     | 57(9)    |
| C(24) | 67(9)    | 41(7)    | 40(7)    | -16(5)   | -29(6)   | 35(7)    |
| C(25) | 27(6)    | 34(6)    | 50(7)    | 0(5)     | -11(5)   | 13(5)    |
| C(26) | 41(7)    | 38(6)    | 44(6)    | -13(5)   | -13(5)   | 24(6)    |
| C(27) | 49(7)    | 32(6)    | 50(7)    | -6(5)    | -13(6)   | 20(6)    |
| C(28) | 32(6)    | 47(7)    | 64(8)    | -12(6)   | -13(6)   | 26(6)    |
| C(29) | 101(11)  | 87(10)   | 60(9)    | 18(7)    | 26(8)    | 75(9)    |
| C(30) | 24(6)    | 34(6)    | 59(7)    | 2(6)     | -10(5)   | 16(5)    |

Electronic Supplementary Information for Dalton Transactions  
This journal is © The Royal Society of Chemistry 2005

|       |         |         |         |        |        |         |
|-------|---------|---------|---------|--------|--------|---------|
| C(31) | 66(8)   | 57(8)   | 35(6)   | 5(5)   | 9(6)   | 48(7)   |
| C(32) | 27(6)   | 24(6)   | 30(5)   | 5(4)   | -3(5)  | 11(5)   |
| C(33) | 46(7)   | 37(6)   | 38(6)   | -4(5)  | -4(5)  | 29(6)   |
| C(34) | 31(6)   | 35(6)   | 40(6)   | -1(5)  | -12(5) | 9(5)    |
| C(35) | 74(9)   | 80(10)  | 52(8)   | 16(7)  | -12(7) | 39(8)   |
| C(36) | 48(7)   | 44(7)   | 31(6)   | 7(5)   | -9(5)  | 21(6)   |
| C(37) | 42(7)   | 41(7)   | 43(7)   | -10(5) | -10(5) | 22(6)   |
| C(38) | 42(7)   | 32(6)   | 45(7)   | -6(5)  | -16(5) | 25(6)   |
| C(39) | 75(9)   | 80(9)   | 45(7)   | 3(7)   | 24(7)  | 34(8)   |
| C(40) | 35(7)   | 47(7)   | 76(9)   | 3(6)   | -2(6)  | 28(6)   |
| C(41) | 49(8)   | 53(8)   | 69(9)   | -3(7)  | 7(7)   | 30(7)   |
| C(42) | 49(7)   | 49(7)   | 30(6)   | -10(5) | -15(5) | 34(6)   |
| C(43) | 41(7)   | 46(7)   | 48(7)   | -6(6)  | -23(6) | 21(6)   |
| C(44) | 31(6)   | 33(7)   | 57(8)   | -12(6) | -13(6) | 15(6)   |
| C(45) | 25(6)   | 24(6)   | 36(6)   | 4(5)   | -4(5)  | 6(5)    |
| C(46) | 37(6)   | 47(7)   | 22(5)   | 7(5)   | 0(5)   | 31(5)   |
| C(47) | 39(7)   | 41(7)   | 49(7)   | -7(6)  | -3(6)  | 24(6)   |
| C(48) | 32(6)   | 57(8)   | 37(6)   | 9(5)   | 7(5)   | 16(6)   |
| C(49) | 84(10)  | 54(8)   | 60(8)   | 5(7)   | 8(7)   | 36(7)   |
| C(50) | 84(10)  | 63(9)   | 61(9)   | 11(7)  | 2(8)   | 22(8)   |
| C(51) | 38(6)   | 29(6)   | 36(6)   | -7(5)  | -14(5) | 22(5)   |
| C(52) | 51(7)   | 42(7)   | 32(6)   | -3(5)  | -9(5)  | 24(6)   |
| C(53) | 41(7)   | 59(8)   | 56(8)   | -13(7) | 1(6)   | 25(7)   |
| C(54) | 44(8)   | 37(7)   | 88(10)  | -25(7) | -6(7)  | 17(6)   |
| C(55) | 70(10)  | 107(12) | 88(11)  | 12(9)  | 17(8)  | 49(9)   |
| C(56) | 60(8)   | 59(8)   | 38(6)   | 10(6)  | 6(6)   | 45(7)   |
| C(57) | 42(8)   | 92(10)  | 83(10)  | 1(8)   | 0(7)   | 31(8)   |
| C(58) | 111(12) | 104(11) | 49(8)   | 21(8)  | 3(8)   | 80(10)  |
| C(59) | 104(12) | 104(12) | 65(9)   | 1(8)   | 22(8)  | 68(10)  |
| C(60) | 82(10)  | 67(9)   | 42(7)   | 6(6)   | 6(7)   | 35(8)   |
| C(61) | 65(9)   | 74(9)   | 58(8)   | -11(7) | -7(7)  | 31(8)   |
| C(62) | 116(12) | 125(13) | 58(9)   | 25(8)  | 11(9)  | 105(11) |
| C(63) | 40(7)   | 54(7)   | 32(6)   | 6(5)   | -4(5)  | 22(6)   |
| C(64) | 88(11)  | 66(10)  | 134(14) | 1(9)   | 52(10) | 37(9)   |
| C(65) | 51(9)   | 72(10)  | 142(14) | 26(10) | -6(9)  | 25(8)   |

Electronic Supplementary Information for Dalton Transactions  
This journal is © The Royal Society of Chemistry 2005

|       |         |         |         |         |         |         |
|-------|---------|---------|---------|---------|---------|---------|
| C(66) | 50(7)   | 43(7)   | 52(7)   | -2(6)   | 1(6)    | 17(6)   |
| C(67) | 25(6)   | 31(6)   | 40(6)   | -7(5)   | 0(5)    | 9(5)    |
| C(68) | 64(9)   | 82(10)  | 80(10)  | 2(8)    | 21(8)   | 34(8)   |
| C(69) | 90(11)  | 88(11)  | 178(17) | 68(11)  | 81(12)  | 64(10)  |
| C(70) | 107(14) | 116(16) | 170(20) | -17(14) | 86(14)  | 7(12)   |
| C(71) | 144(16) | 66(11)  | 122(15) | -14(10) | 38(13)  | 40(12)  |
| C(72) | 69(10)  | 74(11)  | 113(13) | -21(10) | -7(9)   | 36(9)   |
| C(73) | 300(30) | 117(17) | 160(20) | 48(15)  | 130(20) | 130(20) |
| C(74) | 250(30) | 127(17) | 136(17) | 56(14)  | 140(19) | 111(18) |
| C(75) | 42(9)   | 72(10)  | 137(16) | -28(10) | 6(10)   | 5(8)    |
| C(76) | 114(16) | 139(16) | 68(12)  | -18(11) | -10(11) | 40(13)  |
| C(77) | 65(12)  | 220(20) | 129(19) | -74(17) | 26(12)  | 8(14)   |
| C(78) | 134(15) | 86(12)  | 105(13) | 13(10)  | 25(13)  | 77(12)  |
| N(1)  | 37(5)   | 44(5)   | 44(5)   | -8(4)   | -18(4)  | 23(5)   |
| N(2)  | 36(5)   | 34(5)   | 47(5)   | -7(4)   | -13(4)  | 19(4)   |
| N(3)  | 31(5)   | 21(5)   | 30(5)   | -5(4)   | -7(4)   | 5(4)    |
| N(4)  | 38(5)   | 30(5)   | 28(4)   | -14(4)  | -13(4)  | 17(4)   |
| N(5)  | 31(5)   | 32(5)   | 31(5)   | -12(4)  | -18(4)  | 17(4)   |
| N(6)  | 19(4)   | 30(5)   | 30(4)   | -2(4)   | -1(4)   | 12(4)   |
| N(7)  | 27(5)   | 28(5)   | 24(4)   | -4(4)   | -4(4)   | 16(4)   |
| N(8)  | 34(5)   | 29(5)   | 24(4)   | 1(4)    | -2(4)   | 15(4)   |
| N(9)  | 31(5)   | 28(5)   | 21(4)   | 10(4)   | 10(4)   | 15(4)   |
| N(10) | 52(6)   | 36(5)   | 34(5)   | 4(4)    | 1(4)    | 28(5)   |
| O(1)  | 78(7)   | 83(7)   | 83(7)   | -29(6)  | -4(6)   | 26(6)   |
| O(2)  | 97(7)   | 71(6)   | 75(7)   | -5(5)   | -7(6)   | 41(6)   |
| Cr(1) | 32(1)   | 31(1)   | 41(1)   | -11(1)  | -16(1)  | 17(1)   |
| Cr(2) | 27(1)   | 36(1)   | 25(1)   | 1(1)    | 0(1)    | 19(1)   |
| Br(1) | 40(1)   | 42(1)   | 53(1)   | -18(1)  | -16(1)  | 18(1)   |
| Br(2) | 46(1)   | 46(1)   | 46(1)   | 0(1)    | -13(1)  | 14(1)   |
| Br(3) | 26(1)   | 63(1)   | 26(1)   | 7(1)    | 0(1)    | 19(1)   |
| Br(4) | 45(1)   | 72(1)   | 37(1)   | 4(1)    | -2(1)   | 40(1)   |

---

### Structural Data for 3

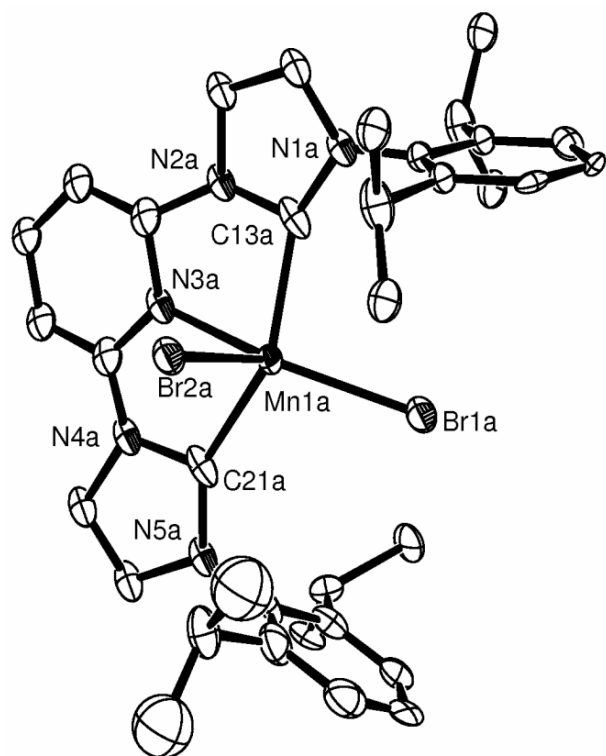

Electronic Supplementary Information for Dalton Transactions  
This journal is © The Royal Society of Chemistry 2005

Table 1. Crystal data and structure refinement for 3.

|                                   |                                                                     |                 |
|-----------------------------------|---------------------------------------------------------------------|-----------------|
| Identification code               | 3                                                                   |                 |
| Empirical formula                 | C <sub>39</sub> H <sub>49</sub> Br <sub>2</sub> Mn N <sub>5</sub> O |                 |
| Formula weight                    | 818.59                                                              |                 |
| Temperature                       | 95(2) K                                                             |                 |
| Wavelength                        | 0.71073 Å                                                           |                 |
| Crystal system                    | Monoclinic                                                          |                 |
| Space group                       | P2 <sub>1</sub> /c                                                  |                 |
| Unit cell dimensions              | a = 10.6948(8) Å                                                    | α = 90°.        |
|                                   | b = 18.7188(14) Å                                                   | β = 93.796(9)°. |
|                                   | c = 19.2039(19) Å                                                   | γ = 90°.        |
| Volume                            | 3836.1(6) Å <sup>3</sup>                                            |                 |
| Z                                 | 4                                                                   |                 |
| Density (calculated)              | 1.417 Mg/m <sup>3</sup>                                             |                 |
| Absorption coefficient            | 2.464 mm <sup>-1</sup>                                              |                 |
| F(000)                            | 1684                                                                |                 |
| Crystal size                      | 0.25 x 0.25 x 0.25 mm <sup>3</sup>                                  |                 |
| Theta range for data collection   | 2.97 to 25.03°.                                                     |                 |
| Index ranges                      | -12 ≤ h ≤ 12, -22 ≤ k ≤ 22, -22 ≤ l ≤ 19                            |                 |
| Reflections collected             | 26916                                                               |                 |
| Independent reflections           | 6754 [R(int) = 0.0661]                                              |                 |
| Completeness to theta = 25.03°    | 99.7 %                                                              |                 |
| Absorption correction             | Semi-empirical from equivalents                                     |                 |
| Max. and min. transmission        | 0.5779 and 0.5779                                                   |                 |
| Refinement method                 | Full-matrix least-squares on F <sup>2</sup>                         |                 |
| Data / restraints / parameters    | 6754 / 1413 / 415                                                   |                 |
| Goodness-of-fit on F <sup>2</sup> | 1.059                                                               |                 |
| Final R indices [I > 2σ(I)]       | R1 = 0.0874, wR2 = 0.2042                                           |                 |
| R indices (all data)              | R1 = 0.1373, wR2 = 0.2333                                           |                 |
| Largest diff. peak and hole       | 2.097 and -1.073 e. Å <sup>-3</sup>                                 |                 |

Table 2. Atomic coordinates ( $\times 10^4$ ) and equivalent isotropic displacement parameters ( $\approx^2 \times 10^3$ ) for 3.  $U(\text{eq})$  is defined as one third of the trace of the orthogonalized  $U^{ij}$  tensor.

|        | x        | y       | z        | $U(\text{eq})$ |
|--------|----------|---------|----------|----------------|
| O(1A)  | 8290(4)  | 5786(2) | 1033(2)  | 60(1)          |
| C(41A) | 10469(5) | 6081(3) | 1011(2)  | 68(1)          |
| C(40A) | 10004(5) | 6230(3) | 1745(3)  | 68(1)          |
| C(43A) | 9017(6)  | 5565(3) | 1701(4)  | 68(1)          |
| C(42A) | 9289(5)  | 5797(3) | 568(4)   | 68(1)          |
| O(1B)  | 8849(4)  | 5963(2) | 1715(2)  | 60(1)          |
| C(41B) | 10729(4) | 5714(2) | 1035(3)  | 68(1)          |
| C(40B) | 9942(5)  | 6328(3) | 1331(3)  | 68(1)          |
| C(43B) | 9275(5)  | 5228(3) | 1793(3)  | 68(1)          |
| C(42B) | 9836(5)  | 5098(3) | 1114(3)  | 68(1)          |
| Mn(1A) | 3339(1)  | 3154(1) | 991(1)   | 20(1)          |
| Br(1A) | 3078(1)  | 2378(1) | 2060(1)  | 29(1)          |
| Br(2A) | 1956(1)  | 4236(1) | 643(1)   | 29(1)          |
| N(1A)  | 5507(2)  | 4177(1) | 1936(1)  | 26(1)          |
| C(14A) | 6368(2)  | 4675(1) | 1680(1)  | 31(1)          |
| C(15A) | 6420(3)  | 4559(2) | 952(1)   | 31(1)          |
| N(2A)  | 5593(3)  | 3989(1) | 758(1)   | 26(1)          |
| C(13A) | 5028(2)  | 3753(1) | 1366(1)  | 28(1)          |
| N(3A)  | 4325(1)  | 3419(1) | 20(1)    | 26(1)          |
| C(16A) | 5212(2)  | 3963(1) | 62(1)    | 28(1)          |
| C(17A) | 5784(2)  | 4177(1) | -533(1)  | 28(1)          |
| C(18A) | 5470(2)  | 3848(2) | -1169(1) | 28(1)          |
| C(19A) | 4584(2)  | 3304(1) | -1211(1) | 28(1)          |
| C(20A) | 4011(2)  | 3090(1) | -617(1)  | 28(1)          |
| C(1A)  | 5444(1)  | 3953(1) | 2546(1)  | 20(1)          |
| C(2A)  | 4439(2)  | 4234(1) | 2880(1)  | 20(1)          |
| C(3A)  | 4316(2)  | 4089(2) | 3582(1)  | 18(1)          |
| C(5A)  | 5196(3)  | 3664(2) | 3950(1)  | 21(1)          |
| C(4A)  | 6201(2)  | 3384(1) | 3616(1)  | 25(1)          |
| C(6A)  | 6325(2)  | 3529(1) | 2914(1)  | 20(1)          |

Electronic Supplementary Information for Dalton Transactions  
This journal is © The Royal Society of Chemistry 2005

|        |          |         |          |       |
|--------|----------|---------|----------|-------|
| N(4A)  | 2975(2)  | 2712(1) | -519(1)  | 26(1) |
| C(22A) | 2274(2)  | 2349(1) | -1064(1) | 31(1) |
| C(23A) | 1396(2)  | 1898(1) | -756(2)  | 31(1) |
| N(5A)  | 1554(2)  | 1983(1) | -21(2)   | 26(1) |
| C(21A) | 2530(2)  | 2486(1) | 126(1)   | 28(1) |
| C(24A) | 1044(1)  | 1576(1) | 462(1)   | 34(1) |
| C(25A) | 1488(1)  | 930(1)  | 734(1)   | 35(1) |
| C(26A) | 857(1)   | 587(1)  | 1249(1)  | 43(1) |
| C(27A) | -218(1)  | 891(1)  | 1491(1)  | 39(1) |
| C(28A) | -662(1)  | 1537(1) | 1219(1)  | 49(1) |
| C(29A) | -31(1)   | 1880(1) | 704(1)   | 40(1) |
| C(7A)  | 7399(4)  | 3164(2) | 2557(2)  | 38(1) |
| C(11A) | 3388(4)  | 5436(2) | 2800(2)  | 32(1) |
| C(12A) | 2106(4)  | 4374(2) | 2535(2)  | 32(1) |
| C(10A) | 3381(4)  | 4663(2) | 2529(2)  | 38(1) |
| C(9A)  | 8644(4)  | 3504(2) | 2842(2)  | 32(1) |
| C(8A)  | 7333(4)  | 2382(2) | 2576(2)  | 32(1) |
| C(30A) | 2571(4)  | 589(2)  | 512(2)   | 37(1) |
| C(31A) | 2559(4)  | -44(3)  | 71(2)    | 42(1) |
| C(32A) | 3564(4)  | 372(3)  | 1179(2)  | 47(2) |
| C(33A) | -598(1)  | 2577(1) | 395(1)   | 38(1) |
| C(34A) | -680(2)  | 3137(1) | 976(1)   | 88(1) |
| C(35A) | -1928(1) | 2440(1) | 64(1)    | 88(1) |
| Mn(1B) | 3748(1)  | 2715(1) | 1102(1)  | 20(1) |
| Br(1B) | 2510(1)  | 2362(1) | 2115(1)  | 29(1) |
| Br(2B) | 5639(1)  | 1938(1) | 974(1)   | 29(1) |
| N(1B)  | 5493(2)  | 4020(1) | 1948(1)  | 26(1) |
| C(14B) | 6396(2)  | 4548(1) | 1809(1)  | 31(1) |
| C(15B) | 6381(3)  | 4642(2) | 1075(1)  | 31(1) |
| N(2B)  | 5469(3)  | 4171(1) | 760(1)   | 26(1) |
| C(13B) | 4920(2)  | 3787(1) | 1299(1)  | 28(1) |
| N(3B)  | 4270(2)  | 3332(1) | 111(1)   | 26(1) |
| C(16B) | 5299(2)  | 3787(1) | 158(1)   | 28(1) |
| C(17B) | 5828(2)  | 4016(2) | -446(1)  | 28(1) |
| C(18B) | 5328(3)  | 3790(2) | -1095(1) | 28(1) |



Electronic Supplementary Information for Dalton Transactions  
This journal is © The Royal Society of Chemistry 2005

|        |          |         |          |       |
|--------|----------|---------|----------|-------|
| C(19B) | 4299(3)  | 3335(1) | -1141(1) | 28(1) |
| C(20B) | 3770(2)  | 3106(1) | -538(1)  | 28(1) |
| C(1B)  | 5188(2)  | 3891(1) | 2667(1)  | 20(1) |
| C(2B)  | 4179(2)  | 4173(1) | 2996(1)  | 20(1) |
| C(3B)  | 4050(2)  | 4033(2) | 3699(1)  | 23(1) |
| C(4B)  | 4929(3)  | 3612(2) | 4072(1)  | 28(1) |
| C(5B)  | 5938(3)  | 3330(2) | 3743(1)  | 24(1) |
| C(6B)  | 6067(2)  | 3469(1) | 3041(1)  | 20(1) |
| N(4B)  | 2975(2)  | 2557(1) | -528(1)  | 26(1) |
| C(22B) | 2230(2)  | 2198(1) | -1059(1) | 31(1) |
| C(23B) | 1361(2)  | 1758(1) | -731(2)  | 31(1) |
| N(5B)  | 1570(3)  | 1845(1) | 2(2)     | 26(1) |
| C(21B) | 2567(2)  | 2338(1) | 128(1)   | 28(1) |
| C(7B)  | 7208(4)  | 3152(3) | 2695(2)  | 38(1) |
| C(11B) | 3404(4)  | 5439(3) | 2800(2)  | 32(1) |
| C(24B) | 912(1)   | 1548(1) | 478(1)   | 27(1) |
| C(25B) | 1410(1)  | 895(1)  | 701(1)   | 33(1) |
| C(26B) | 768(1)   | 470(1)  | 1152(1)  | 39(1) |
| C(27B) | -372(2)  | 699(1)  | 1380(1)  | 40(1) |
| C(28B) | -870(1)  | 1352(1) | 1157(1)  | 41(1) |
| C(29B) | -228(1)  | 1777(1) | 706(1)   | 40(1) |
| C(12B) | 1907(4)  | 4358(3) | 2691(2)  | 32(1) |
| C(10B) | 3212(5)  | 4677(3) | 2563(3)  | 38(1) |
| C(9B)  | 8416(4)  | 3425(3) | 2989(2)  | 32(1) |
| C(8B)  | 7217(4)  | 2304(2) | 2817(2)  | 32(1) |
| C(30B) | 2728(4)  | 604(3)  | 410(3)   | 33(1) |
| C(31B) | 2279(5)  | -157(2) | 59(3)    | 42(2) |
| C(32B) | 3705(5)  | 606(2)  | 962(3)   | 44(2) |
| C(33B) | -674(1)  | 2535(1) | 502(1)   | 38(1) |
| C(34B) | -739(6)  | 3070(3) | 997(2)   | 88(1) |
| C(35B) | -1490(5) | 2592(3) | -170(2)  | 88(1) |

---

Table 3. Bond lengths [ $\approx$ ] and angles [ $\infty$ ] for 3.

---

|               |            |
|---------------|------------|
| O(1A)-C(42A)  | 1.437(7)   |
| O(1A)-C(43A)  | 1.513(7)   |
| C(41A)-C(40A) | 1.549(7)   |
| C(41A)-C(42A) | 1.567(8)   |
| C(41A)-H(41A) | 0.9900     |
| C(41A)-H(41B) | 0.9900     |
| C(40A)-C(43A) | 1.630(8)   |
| C(40A)-H(40A) | 0.9900     |
| C(40A)-H(40B) | 0.9900     |
| C(43A)-H(43A) | 0.9900     |
| C(43A)-H(43B) | 0.9900     |
| C(42A)-H(42A) | 0.9900     |
| C(42A)-H(42B) | 0.9900     |
| O(1B)-C(43B)  | 1.454(7)   |
| O(1B)-C(40B)  | 1.579(7)   |
| C(41B)-C(42B) | 1.512(6)   |
| C(41B)-C(40B) | 1.553(7)   |
| C(41B)-H(41C) | 0.9900     |
| C(41B)-H(41D) | 0.9900     |
| C(40B)-H(40C) | 0.9900     |
| C(40B)-H(40D) | 0.9900     |
| C(43B)-C(42B) | 1.491(7)   |
| C(43B)-H(43C) | 0.9900     |
| C(43B)-H(43D) | 0.9900     |
| C(42B)-H(42C) | 0.9900     |
| C(42B)-H(42D) | 0.9900     |
| Mn(1A)-C(13A) | 2.206(2)   |
| Mn(1A)-C(21A) | 2.210(2)   |
| Mn(1A)-N(3A)  | 2.2574(16) |
| Mn(1A)-Br(1A) | 2.5458(7)  |
| Mn(1A)-Br(2A) | 2.5708(7)  |
| N(1A)-C(1A)   | 1.250(2)   |
| N(1A)-C(14A)  | 1.4200     |

Electronic Supplementary Information for Dalton Transactions  
This journal is © The Royal Society of Chemistry 2005

|               |          |
|---------------|----------|
| N(1A)-C(13A)  | 1.4200   |
| C(14A)-C(15A) | 1.4200   |
| C(14A)-H(14A) | 0.9500   |
| C(15A)-N(2A)  | 1.4200   |
| C(15A)-H(15A) | 0.9500   |
| N(2A)-C(16A)  | 1.372(2) |
| N(2A)-C(13A)  | 1.4200   |
| N(3A)-C(16A)  | 1.3900   |
| N(3A)-C(20A)  | 1.3900   |
| C(16A)-C(17A) | 1.3900   |
| C(17A)-C(18A) | 1.3900   |
| C(17A)-H(17A) | 0.9500   |
| C(18A)-C(19A) | 1.3900   |
| C(18A)-H(18A) | 0.9500   |
| C(19A)-C(20A) | 1.3900   |
| C(19A)-H(19A) | 0.9500   |
| C(20A)-N(4A)  | 1.338(2) |
| C(1A)-C(2A)   | 1.3900   |
| C(1A)-C(6A)   | 1.3900   |
| C(2A)-C(3A)   | 1.3900   |
| C(2A)-C(10A)  | 1.510(5) |
| C(3A)-C(5A)   | 1.3900   |
| C(3A)-H(3A)   | 0.9500   |
| C(5A)-C(4A)   | 1.3900   |
| C(5A)-H(5A)   | 0.9500   |
| C(4A)-C(6A)   | 1.3900   |
| C(4A)-H(4A)   | 0.9500   |
| C(6A)-C(7A)   | 1.536(5) |
| N(4A)-C(22A)  | 1.4200   |
| N(4A)-C(21A)  | 1.4200   |
| C(22A)-C(23A) | 1.4200   |
| C(22A)-H(22A) | 0.9500   |
| C(23A)-N(5A)  | 1.4200   |
| C(23A)-H(23A) | 0.9500   |
| N(5A)-C(24A)  | 1.343(2) |

Electronic Supplementary Information for Dalton Transactions  
This journal is © The Royal Society of Chemistry 2005

|               |          |
|---------------|----------|
| N(5A)-C(21A)  | 1.4200   |
| C(24A)-C(25A) | 1.3900   |
| C(24A)-C(29A) | 1.3900   |
| C(25A)-C(26A) | 1.3900   |
| C(25A)-C(30A) | 1.413(5) |
| C(26A)-C(27A) | 1.3900   |
| C(26A)-H(26A) | 0.9500   |
| C(27A)-C(28A) | 1.3900   |
| C(27A)-H(27A) | 0.9500   |
| C(28A)-C(29A) | 1.3900   |
| C(28A)-H(28A) | 0.9500   |
| C(29A)-C(33A) | 1.5401   |
| C(7A)-C(8A)   | 1.465(6) |
| C(7A)-C(9A)   | 1.543(6) |
| C(7A)-H(7A)   | 1.0000   |
| C(11A)-C(10A) | 1.537(6) |
| C(11A)-H(11A) | 0.9800   |
| C(11A)-H(11B) | 0.9800   |
| C(11A)-H(11C) | 0.9800   |
| C(12A)-C(10A) | 1.469(6) |
| C(12A)-H(12A) | 0.9800   |
| C(12A)-H(12B) | 0.9800   |
| C(12A)-H(12C) | 0.9800   |
| C(10A)-H(10A) | 1.0000   |
| C(9A)-H(9A1)  | 0.9800   |
| C(9A)-H(9A2)  | 0.9800   |
| C(9A)-H(9A3)  | 0.9800   |
| C(8A)-H(8A1)  | 0.9800   |
| C(8A)-H(8A2)  | 0.9800   |
| C(8A)-H(8A3)  | 0.9800   |
| C(30A)-C(31A) | 1.456(6) |
| C(30A)-C(32A) | 1.660(6) |
| C(30A)-H(30A) | 1.0000   |
| C(31A)-H(31A) | 0.9800   |
| C(31A)-H(31B) | 0.9800   |

Electronic Supplementary Information for Dalton Transactions  
This journal is © The Royal Society of Chemistry 2005

|               |            |
|---------------|------------|
| C(31A)-H(31C) | 0.9800     |
| C(32A)-H(32A) | 0.9800     |
| C(32A)-H(32B) | 0.9800     |
| C(32A)-H(32C) | 0.9800     |
| C(33A)-C(35A) | 1.5398(6)  |
| C(33A)-C(34A) | 1.5399(6)  |
| C(33A)-H(33A) | 1.0000     |
| C(34A)-H(34A) | 0.9800     |
| C(34A)-H(34B) | 0.9800     |
| C(34A)-H(34C) | 0.9800     |
| C(35A)-H(35A) | 0.9800     |
| C(35A)-H(35B) | 0.9800     |
| C(35A)-H(35C) | 0.9800     |
| Mn(1B)-C(21B) | 2.298(2)   |
| Mn(1B)-N(3B)  | 2.3257(16) |
| Mn(1B)-C(13B) | 2.384(2)   |
| Mn(1B)-Br(1B) | 2.5126(8)  |
| Mn(1B)-Br(2B) | 2.5151(7)  |
| N(1B)-C(13B)  | 1.4200     |
| N(1B)-C(14B)  | 1.4200     |
| N(1B)-C(1B)   | 1.460(2)   |
| C(14B)-C(15B) | 1.4200     |
| C(14B)-H(14B) | 0.9500     |
| C(15B)-N(2B)  | 1.4200     |
| C(15B)-H(15B) | 0.9500     |
| N(2B)-C(16B)  | 1.364(3)   |
| N(2B)-C(13B)  | 1.4200     |
| N(3B)-C(16B)  | 1.3900     |
| N(3B)-C(20B)  | 1.3900     |
| C(16B)-C(17B) | 1.3900     |
| C(17B)-C(18B) | 1.3900     |
| C(17B)-H(17B) | 0.9500     |
| C(18B)-C(19B) | 1.3900     |
| C(18B)-H(18B) | 0.9500     |
| C(19B)-C(20B) | 1.3900     |

Electronic Supplementary Information for Dalton Transactions  
This journal is © The Royal Society of Chemistry 2005

|               |          |
|---------------|----------|
| C(19B)-H(19B) | 0.9500   |
| C(20B)-N(4B)  | 1.334(2) |
| C(1B)-C(2B)   | 1.3900   |
| C(1B)-C(6B)   | 1.3900   |
| C(2B)-C(3B)   | 1.3900   |
| C(2B)-C(10B)  | 1.593(5) |
| C(3B)-C(4B)   | 1.3900   |
| C(3B)-H(3B)   | 0.9500   |
| C(4B)-C(5B)   | 1.3900   |
| C(4B)-H(4B)   | 0.9500   |
| C(5B)-C(6B)   | 1.3900   |
| C(5B)-H(5B)   | 0.9500   |
| C(6B)-C(7B)   | 1.546(5) |
| N(4B)-C(22B)  | 1.4200   |
| N(4B)-C(21B)  | 1.4200   |
| C(22B)-C(23B) | 1.4200   |
| C(22B)-H(22B) | 0.9500   |
| C(23B)-N(5B)  | 1.4200   |
| C(23B)-H(23B) | 0.9500   |
| N(5B)-C(24B)  | 1.312(2) |
| N(5B)-C(21B)  | 1.4200   |
| C(7B)-C(9B)   | 1.467(6) |
| C(7B)-C(8B)   | 1.604(7) |
| C(7B)-H(7B)   | 1.0000   |
| C(11B)-C(10B) | 1.507(7) |
| C(11B)-H(11D) | 0.9800   |
| C(11B)-H(11E) | 0.9800   |
| C(11B)-H(11F) | 0.9800   |
| C(24B)-C(25B) | 1.3900   |
| C(24B)-C(29B) | 1.3900   |
| C(25B)-C(26B) | 1.3900   |
| C(25B)-C(30B) | 1.643(5) |
| C(26B)-C(27B) | 1.3900   |
| C(26B)-H(26B) | 0.9500   |
| C(27B)-C(28B) | 1.3900   |

Electronic Supplementary Information for Dalton Transactions  
This journal is © The Royal Society of Chemistry 2005

|                     |          |
|---------------------|----------|
| C(27B)-H(27B)       | 0.9500   |
| C(28B)-C(29B)       | 1.3900   |
| C(28B)-H(28B)       | 0.9500   |
| C(29B)-C(33B)       | 1.5401   |
| C(12B)-C(10B)       | 1.553(7) |
| C(12B)-H(12D)       | 0.9800   |
| C(12B)-H(12E)       | 0.9800   |
| C(12B)-H(12F)       | 0.9800   |
| C(10B)-H(10B)       | 1.0000   |
| C(9B)-H(9B1)        | 0.9800   |
| C(9B)-H(9B2)        | 0.9800   |
| C(9B)-H(9B3)        | 0.9800   |
| C(8B)-H(8B1)        | 0.9800   |
| C(8B)-H(8B2)        | 0.9800   |
| C(8B)-H(8B3)        | 0.9800   |
| C(30B)-C(32B)       | 1.439(7) |
| C(30B)-C(31B)       | 1.635(7) |
| C(30B)-H(30B)       | 1.0000   |
| C(31B)-H(31D)       | 0.9800   |
| C(31B)-H(31E)       | 0.9800   |
| C(31B)-H(31F)       | 0.9800   |
| C(32B)-H(32D)       | 0.9800   |
| C(32B)-H(32E)       | 0.9800   |
| C(32B)-H(32F)       | 0.9800   |
| C(33B)-C(34B)       | 1.386(5) |
| C(33B)-C(35B)       | 1.514(4) |
| C(33B)-H(33B)       | 1.0000   |
| C(34B)-H(34D)       | 0.9800   |
| C(34B)-H(34E)       | 0.9800   |
| C(34B)-H(34F)       | 0.9800   |
| C(35B)-H(35D)       | 0.9800   |
| C(35B)-H(35E)       | 0.9800   |
| C(35B)-H(35F)       | 0.9800   |
| C(42A)-O(1A)-C(43A) | 99.7(4)  |

Electronic Supplementary Information for Dalton Transactions  
This journal is © The Royal Society of Chemistry 2005

|                      |          |
|----------------------|----------|
| C(40A)-C(41A)-C(42A) | 105.0(5) |
| C(40A)-C(41A)-H(41A) | 110.7    |
| C(42A)-C(41A)-H(41A) | 110.7    |
| C(40A)-C(41A)-H(41B) | 110.7    |
| C(42A)-C(41A)-H(41B) | 110.7    |
| H(41A)-C(41A)-H(41B) | 108.8    |
| C(41A)-C(40A)-C(43A) | 93.6(4)  |
| C(41A)-C(40A)-H(40A) | 113.0    |
| C(43A)-C(40A)-H(40A) | 113.0    |
| C(41A)-C(40A)-H(40B) | 113.0    |
| C(43A)-C(40A)-H(40B) | 113.0    |
| H(40A)-C(40A)-H(40B) | 110.4    |
| O(1A)-C(43A)-C(40A)  | 97.5(4)  |
| O(1A)-C(43A)-H(43A)  | 112.3    |
| C(40A)-C(43A)-H(43A) | 112.3    |
| O(1A)-C(43A)-H(43B)  | 112.3    |
| C(40A)-C(43A)-H(43B) | 112.3    |
| H(43A)-C(43A)-H(43B) | 109.9    |
| O(1A)-C(42A)-C(41A)  | 105.8(5) |
| O(1A)-C(42A)-H(42A)  | 110.6    |
| C(41A)-C(42A)-H(42A) | 110.6    |
| O(1A)-C(42A)-H(42B)  | 110.6    |
| C(41A)-C(42A)-H(42B) | 110.6    |
| H(42A)-C(42A)-H(42B) | 108.7    |
| C(43B)-O(1B)-C(40B)  | 102.7(4) |
| C(42B)-C(41B)-C(40B) | 99.6(4)  |
| C(42B)-C(41B)-H(41C) | 111.8    |
| C(40B)-C(41B)-H(41C) | 111.8    |
| C(42B)-C(41B)-H(41D) | 111.8    |
| C(40B)-C(41B)-H(41D) | 111.8    |
| H(41C)-C(41B)-H(41D) | 109.6    |
| C(41B)-C(40B)-O(1B)  | 106.7(4) |
| C(41B)-C(40B)-H(40C) | 110.4    |
| O(1B)-C(40B)-H(40C)  | 110.4    |
| C(41B)-C(40B)-H(40D) | 110.4    |



Electronic Supplementary Information for Dalton Transactions  
This journal is © The Royal Society of Chemistry 2005

|                      |            |
|----------------------|------------|
| O(1B)-C(40B)-H(40D)  | 110.4      |
| H(40C)-C(40B)-H(40D) | 108.6      |
| O(1B)-C(43B)-C(42B)  | 101.9(4)   |
| O(1B)-C(43B)-H(43C)  | 111.4      |
| C(42B)-C(43B)-H(43C) | 111.4      |
| O(1B)-C(43B)-H(43D)  | 111.4      |
| C(42B)-C(43B)-H(43D) | 111.4      |
| H(43C)-C(43B)-H(43D) | 109.3      |
| C(43B)-C(42B)-C(41B) | 104.8(4)   |
| C(43B)-C(42B)-H(42C) | 110.8      |
| C(41B)-C(42B)-H(42C) | 110.8      |
| C(43B)-C(42B)-H(42D) | 110.8      |
| C(41B)-C(42B)-H(42D) | 110.8      |
| H(42C)-C(42B)-H(42D) | 108.9      |
| C(13A)-Mn(1A)-C(21A) | 143.58(8)  |
| C(13A)-Mn(1A)-N(3A)  | 74.99(7)   |
| C(21A)-Mn(1A)-N(3A)  | 71.60(6)   |
| C(13A)-Mn(1A)-Br(1A) | 99.12(6)   |
| C(21A)-Mn(1A)-Br(1A) | 102.96(5)  |
| N(3A)-Mn(1A)-Br(1A)  | 150.91(5)  |
| C(13A)-Mn(1A)-Br(2A) | 97.41(6)   |
| C(21A)-Mn(1A)-Br(2A) | 93.48(6)   |
| N(3A)-Mn(1A)-Br(2A)  | 84.52(4)   |
| Br(1A)-Mn(1A)-Br(2A) | 124.57(3)  |
| C(1A)-N(1A)-C(14A)   | 128.35(12) |
| C(1A)-N(1A)-C(13A)   | 119.75(12) |
| C(14A)-N(1A)-C(13A)  | 108.0      |
| N(1A)-C(14A)-C(15A)  | 108.0      |
| N(1A)-C(14A)-H(14A)  | 126.0      |
| C(15A)-C(14A)-H(14A) | 126.0      |
| N(2A)-C(15A)-C(14A)  | 108.0      |
| N(2A)-C(15A)-H(15A)  | 126.0      |
| C(14A)-C(15A)-H(15A) | 126.0      |
| C(16A)-N(2A)-C(15A)  | 115.05(17) |
| C(16A)-N(2A)-C(13A)  | 132.42(18) |

Electronic Supplementary Information for Dalton Transactions  
This journal is © The Royal Society of Chemistry 2005

|                      |            |
|----------------------|------------|
| C(15A)-N(2A)-C(13A)  | 108.0      |
| N(2A)-C(13A)-N(1A)   | 108.0      |
| N(2A)-C(13A)-Mn(1A)  | 105.86(10) |
| N(1A)-C(13A)-Mn(1A)  | 141.39(11) |
| C(16A)-N(3A)-C(20A)  | 120.0      |
| C(16A)-N(3A)-Mn(1A)  | 117.82(7)  |
| C(20A)-N(3A)-Mn(1A)  | 122.04(7)  |
| N(2A)-C(16A)-N(3A)   | 103.95(15) |
| N(2A)-C(16A)-C(17A)  | 132.11(15) |
| N(3A)-C(16A)-C(17A)  | 120.0      |
| C(18A)-C(17A)-C(16A) | 120.0      |
| C(18A)-C(17A)-H(17A) | 120.0      |
| C(16A)-C(17A)-H(17A) | 120.0      |
| C(19A)-C(18A)-C(17A) | 120.0      |
| C(19A)-C(18A)-H(18A) | 120.0      |
| C(17A)-C(18A)-H(18A) | 120.0      |
| C(18A)-C(19A)-C(20A) | 120.0      |
| C(18A)-C(19A)-H(19A) | 120.0      |
| C(20A)-C(19A)-H(19A) | 120.0      |
| N(4A)-C(20A)-C(19A)  | 133.05(12) |
| N(4A)-C(20A)-N(3A)   | 105.31(12) |
| C(19A)-C(20A)-N(3A)  | 120.0      |
| N(1A)-C(1A)-C(2A)    | 113.39(12) |
| N(1A)-C(1A)-C(6A)    | 126.28(12) |
| C(2A)-C(1A)-C(6A)    | 120.0      |
| C(3A)-C(2A)-C(1A)    | 120.0      |
| C(3A)-C(2A)-C(10A)   | 114.8(2)   |
| C(1A)-C(2A)-C(10A)   | 125.1(2)   |
| C(2A)-C(3A)-C(5A)    | 120.0      |
| C(2A)-C(3A)-H(3A)    | 120.0      |
| C(5A)-C(3A)-H(3A)    | 120.0      |
| C(4A)-C(5A)-C(3A)    | 120.0      |
| C(4A)-C(5A)-H(5A)    | 120.0      |
| C(3A)-C(5A)-H(5A)    | 120.0      |
| C(5A)-C(4A)-C(6A)    | 120.0      |

Electronic Supplementary Information for Dalton Transactions  
This journal is © The Royal Society of Chemistry 2005

|                      |            |
|----------------------|------------|
| C(5A)-C(4A)-H(4A)    | 120.0      |
| C(6A)-C(4A)-H(4A)    | 120.0      |
| C(4A)-C(6A)-C(1A)    | 120.0      |
| C(4A)-C(6A)-C(7A)    | 117.93(19) |
| C(1A)-C(6A)-C(7A)    | 121.94(19) |
| C(20A)-N(4A)-C(22A)  | 123.38(12) |
| C(20A)-N(4A)-C(21A)  | 127.53(12) |
| C(22A)-N(4A)-C(21A)  | 108.0      |
| C(23A)-C(22A)-N(4A)  | 108.0      |
| C(23A)-C(22A)-H(22A) | 126.0      |
| N(4A)-C(22A)-H(22A)  | 126.0      |
| N(5A)-C(23A)-C(22A)  | 108.0      |
| N(5A)-C(23A)-H(23A)  | 126.0      |
| C(22A)-C(23A)-H(23A) | 126.0      |
| C(24A)-N(5A)-C(23A)  | 126.63(19) |
| C(24A)-N(5A)-C(21A)  | 124.42(19) |
| C(23A)-N(5A)-C(21A)  | 108.0      |
| N(5A)-C(21A)-N(4A)   | 108.0      |
| N(5A)-C(21A)-Mn(1A)  | 140.44(10) |
| N(4A)-C(21A)-Mn(1A)  | 110.42(10) |
| N(5A)-C(24A)-C(25A)  | 127.52(13) |
| N(5A)-C(24A)-C(29A)  | 112.46(13) |
| C(25A)-C(24A)-C(29A) | 120.0      |
| C(26A)-C(25A)-C(24A) | 120.0      |
| C(26A)-C(25A)-C(30A) | 116.90(19) |
| C(24A)-C(25A)-C(30A) | 123.10(19) |
| C(25A)-C(26A)-C(27A) | 120.0      |
| C(25A)-C(26A)-H(26A) | 120.0      |
| C(27A)-C(26A)-H(26A) | 120.0      |
| C(26A)-C(27A)-C(28A) | 120.0      |
| C(26A)-C(27A)-H(27A) | 120.0      |
| C(28A)-C(27A)-H(27A) | 120.0      |
| C(29A)-C(28A)-C(27A) | 120.0      |
| C(29A)-C(28A)-H(28A) | 120.0      |
| C(27A)-C(28A)-H(28A) | 120.0      |

Electronic Supplementary Information for Dalton Transactions  
This journal is © The Royal Society of Chemistry 2005

|                      |            |
|----------------------|------------|
| C(28A)-C(29A)-C(24A) | 120.0      |
| C(28A)-C(29A)-C(33A) | 117.90(5)  |
| C(24A)-C(29A)-C(33A) | 122.03(5)  |
| C(8A)-C(7A)-C(6A)    | 113.2(4)   |
| C(8A)-C(7A)-C(9A)    | 116.4(4)   |
| C(6A)-C(7A)-C(9A)    | 108.2(3)   |
| C(8A)-C(7A)-H(7A)    | 106.1      |
| C(6A)-C(7A)-H(7A)    | 106.1      |
| C(9A)-C(7A)-H(7A)    | 106.1      |
| C(12A)-C(10A)-C(2A)  | 118.0(4)   |
| C(12A)-C(10A)-C(11A) | 109.2(4)   |
| C(2A)-C(10A)-C(11A)  | 111.4(3)   |
| C(12A)-C(10A)-H(10A) | 105.8      |
| C(2A)-C(10A)-H(10A)  | 105.8      |
| C(11A)-C(10A)-H(10A) | 105.8      |
| C(25A)-C(30A)-C(31A) | 124.6(4)   |
| C(25A)-C(30A)-C(32A) | 111.9(3)   |
| C(31A)-C(30A)-C(32A) | 103.3(4)   |
| C(25A)-C(30A)-H(30A) | 105.1      |
| C(31A)-C(30A)-H(30A) | 105.1      |
| C(32A)-C(30A)-H(30A) | 105.1      |
| C(35A)-C(33A)-C(34A) | 108.42(11) |
| C(35A)-C(33A)-C(29A) | 110.34(8)  |
| C(34A)-C(33A)-C(29A) | 109.69(6)  |
| C(35A)-C(33A)-H(33A) | 109.5      |
| C(34A)-C(33A)-H(33A) | 109.5      |
| C(29A)-C(33A)-H(33A) | 109.5      |
| C(21B)-Mn(1B)-N(3B)  | 68.56(6)   |
| C(21B)-Mn(1B)-C(13B) | 129.95(7)  |
| N(3B)-Mn(1B)-C(13B)  | 63.85(6)   |
| C(21B)-Mn(1B)-Br(1B) | 105.11(6)  |
| N(3B)-Mn(1B)-Br(1B)  | 158.65(5)  |
| C(13B)-Mn(1B)-Br(1B) | 113.40(6)  |
| C(21B)-Mn(1B)-Br(2B) | 98.34(7)   |
| N(3B)-Mn(1B)-Br(2B)  | 88.20(5)   |

Electronic Supplementary Information for Dalton Transactions  
This journal is © The Royal Society of Chemistry 2005

|                      |            |
|----------------------|------------|
| C(13B)-Mn(1B)-Br(2B) | 94.84(7)   |
| Br(1B)-Mn(1B)-Br(2B) | 113.10(3)  |
| C(13B)-N(1B)-C(14B)  | 108.0      |
| C(13B)-N(1B)-C(1B)   | 131.94(12) |
| C(14B)-N(1B)-C(1B)   | 119.34(12) |
| C(15B)-C(14B)-N(1B)  | 108.0      |
| C(15B)-C(14B)-H(14B) | 126.0      |
| N(1B)-C(14B)-H(14B)  | 126.0      |
| N(2B)-C(15B)-C(14B)  | 108.0      |
| N(2B)-C(15B)-H(15B)  | 126.0      |
| C(14B)-C(15B)-H(15B) | 126.0      |
| C(16B)-N(2B)-C(15B)  | 137.55(19) |
| C(16B)-N(2B)-C(13B)  | 108.23(17) |
| C(15B)-N(2B)-C(13B)  | 108.0      |
| N(2B)-C(13B)-N(1B)   | 108.0      |
| N(2B)-C(13B)-Mn(1B)  | 123.34(9)  |
| N(1B)-C(13B)-Mn(1B)  | 126.13(9)  |
| C(16B)-N(3B)-C(20B)  | 120.0      |
| C(16B)-N(3B)-Mn(1B)  | 118.96(7)  |
| C(20B)-N(3B)-Mn(1B)  | 118.94(7)  |
| N(2B)-C(16B)-N(3B)   | 115.98(16) |
| N(2B)-C(16B)-C(17B)  | 120.33(15) |
| N(3B)-C(16B)-C(17B)  | 120.0      |
| C(16B)-C(17B)-C(18B) | 120.0      |
| C(16B)-C(17B)-H(17B) | 120.0      |
| C(18B)-C(17B)-H(17B) | 120.0      |
| C(17B)-C(18B)-C(19B) | 120.0      |
| C(17B)-C(18B)-H(18B) | 120.0      |
| C(19B)-C(18B)-H(18B) | 120.0      |
| C(20B)-C(19B)-C(18B) | 120.0      |
| C(20B)-C(19B)-H(19B) | 120.0      |
| C(18B)-C(19B)-H(19B) | 120.0      |
| N(4B)-C(20B)-C(19B)  | 122.96(13) |
| N(4B)-C(20B)-N(3B)   | 115.43(13) |
| C(19B)-C(20B)-N(3B)  | 120.0      |

Electronic Supplementary Information for Dalton Transactions  
This journal is © The Royal Society of Chemistry 2005

|                      |            |
|----------------------|------------|
| C(2B)-C(1B)-C(6B)    | 120.0      |
| C(2B)-C(1B)-N(1B)    | 126.56(12) |
| C(6B)-C(1B)-N(1B)    | 113.35(12) |
| C(1B)-C(2B)-C(3B)    | 120.0      |
| C(1B)-C(2B)-C(10B)   | 119.0(2)   |
| C(3B)-C(2B)-C(10B)   | 121.0(2)   |
| C(2B)-C(3B)-C(4B)    | 120.0      |
| C(2B)-C(3B)-H(3B)    | 120.0      |
| C(4B)-C(3B)-H(3B)    | 120.0      |
| C(5B)-C(4B)-C(3B)    | 120.0      |
| C(5B)-C(4B)-H(4B)    | 120.0      |
| C(3B)-C(4B)-H(4B)    | 120.0      |
| C(6B)-C(5B)-C(4B)    | 120.0      |
| C(6B)-C(5B)-H(5B)    | 120.0      |
| C(4B)-C(5B)-H(5B)    | 120.0      |
| C(5B)-C(6B)-C(1B)    | 120.0      |
| C(5B)-C(6B)-C(7B)    | 118.5(2)   |
| C(1B)-C(6B)-C(7B)    | 121.5(2)   |
| C(20B)-N(4B)-C(22B)  | 132.98(13) |
| C(20B)-N(4B)-C(21B)  | 117.90(14) |
| C(22B)-N(4B)-C(21B)  | 108.0      |
| C(23B)-C(22B)-N(4B)  | 108.0      |
| C(23B)-C(22B)-H(22B) | 126.0      |
| N(4B)-C(22B)-H(22B)  | 126.0      |
| N(5B)-C(23B)-C(22B)  | 108.0      |
| N(5B)-C(23B)-H(23B)  | 126.0      |
| C(22B)-C(23B)-H(23B) | 126.0      |
| C(24B)-N(5B)-C(23B)  | 125.8(2)   |
| C(24B)-N(5B)-C(21B)  | 126.1(2)   |
| C(23B)-N(5B)-C(21B)  | 108.0      |
| N(5B)-C(21B)-N(4B)   | 108.0      |
| N(5B)-C(21B)-Mn(1B)  | 134.70(11) |
| N(4B)-C(21B)-Mn(1B)  | 116.72(11) |
| C(9B)-C(7B)-C(6B)    | 113.6(4)   |
| C(9B)-C(7B)-C(8B)    | 107.0(4)   |

Electronic Supplementary Information for Dalton Transactions  
This journal is © The Royal Society of Chemistry 2005

|                      |            |
|----------------------|------------|
| C(6B)-C(7B)-C(8B)    | 108.3(3)   |
| C(9B)-C(7B)-H(7B)    | 109.3      |
| C(6B)-C(7B)-H(7B)    | 109.3      |
| C(8B)-C(7B)-H(7B)    | 109.3      |
| N(5B)-C(24B)-C(25B)  | 112.04(14) |
| N(5B)-C(24B)-C(29B)  | 127.60(14) |
| C(25B)-C(24B)-C(29B) | 120.0      |
| C(26B)-C(25B)-C(24B) | 120.0      |
| C(26B)-C(25B)-C(30B) | 119.54(18) |
| C(24B)-C(25B)-C(30B) | 120.42(18) |
| C(27B)-C(26B)-C(25B) | 120.0      |
| C(27B)-C(26B)-H(26B) | 120.0      |
| C(25B)-C(26B)-H(26B) | 120.0      |
| C(28B)-C(27B)-C(26B) | 120.0      |
| C(28B)-C(27B)-H(27B) | 120.0      |
| C(26B)-C(27B)-H(27B) | 120.0      |
| C(27B)-C(28B)-C(29B) | 120.0      |
| C(27B)-C(28B)-H(28B) | 120.0      |
| C(29B)-C(28B)-H(28B) | 120.0      |
| C(28B)-C(29B)-C(24B) | 120.0      |
| C(28B)-C(29B)-C(33B) | 121.82(8)  |
| C(24B)-C(29B)-C(33B) | 117.90(8)  |
| C(11B)-C(10B)-C(12B) | 115.0(4)   |
| C(11B)-C(10B)-C(2B)  | 109.5(3)   |
| C(12B)-C(10B)-C(2B)  | 104.4(3)   |
| C(11B)-C(10B)-H(10B) | 109.3      |
| C(12B)-C(10B)-H(10B) | 109.3      |
| C(2B)-C(10B)-H(10B)  | 109.3      |
| C(32B)-C(30B)-C(31B) | 119.0(4)   |
| C(32B)-C(30B)-C(25B) | 110.3(4)   |
| C(31B)-C(30B)-C(25B) | 101.2(3)   |
| C(32B)-C(30B)-H(30B) | 108.6      |
| C(31B)-C(30B)-H(30B) | 108.6      |
| C(25B)-C(30B)-H(30B) | 108.6      |
| C(34B)-C(33B)-C(35B) | 118.8(3)   |

Electronic Supplementary Information for Dalton Transactions  
This journal is © The Royal Society of Chemistry 2005

|                      |          |
|----------------------|----------|
| C(34B)-C(33B)-C(29B) | 121.4(2) |
| C(35B)-C(33B)-C(29B) | 115.7(2) |
| C(34B)-C(33B)-H(33B) | 96.8     |
| C(35B)-C(33B)-H(33B) | 96.8     |
| C(29B)-C(33B)-H(33B) | 96.8     |

---

Symmetry transformations used to generate equivalent atoms:



Table 4. Anisotropic displacement parameters ( $\approx 2 \times 10^3$ ) for 3. The anisotropic displacement factor exponent takes the form:  $-2\pi^2 [ h^2 a^* U^{11} + \dots + 2 h k a^* b^* U^{12} ]$

|        | U <sup>11</sup> | U <sup>22</sup> | U <sup>33</sup> | U <sup>23</sup> | U <sup>13</sup> | U <sup>12</sup> |
|--------|-----------------|-----------------|-----------------|-----------------|-----------------|-----------------|
| O(1A)  | 62(2)           | 39(1)           | 79(2)           | 16(1)           | -3(1)           | 5(1)            |
| C(41A) | 62(1)           | 60(1)           | 82(1)           | 9(1)            | 9(1)            | -9(1)           |
| C(40A) | 62(1)           | 60(1)           | 82(1)           | 9(1)            | 9(1)            | -9(1)           |
| C(43A) | 62(1)           | 60(1)           | 82(1)           | 9(1)            | 9(1)            | -9(1)           |
| C(42A) | 62(1)           | 60(1)           | 82(1)           | 9(1)            | 9(1)            | -9(1)           |
| O(1B)  | 62(2)           | 39(1)           | 79(2)           | 16(1)           | -3(1)           | 5(1)            |
| C(41B) | 62(1)           | 60(1)           | 82(1)           | 9(1)            | 9(1)            | -9(1)           |
| C(40B) | 62(1)           | 60(1)           | 82(1)           | 9(1)            | 9(1)            | -9(1)           |
| C(43B) | 62(1)           | 60(1)           | 82(1)           | 9(1)            | 9(1)            | -9(1)           |
| C(42B) | 62(1)           | 60(1)           | 82(1)           | 9(1)            | 9(1)            | -9(1)           |
| Mn(1A) | 24(1)           | 22(1)           | 14(1)           | -1(1)           | 0(1)            | -1(1)           |
| Br(1A) | 32(1)           | 32(1)           | 23(1)           | 0(1)            | -3(1)           | 0(1)            |
| Br(2A) | 32(1)           | 32(1)           | 23(1)           | 0(1)            | -3(1)           | 0(1)            |
| N(1A)  | 44(1)           | 9(1)            | 23(1)           | -4(1)           | -12(1)          | 10(1)           |
| C(14A) | 54(1)           | 13(1)           | 24(1)           | -4(1)           | -14(1)          | 7(1)            |
| C(15A) | 54(1)           | 13(1)           | 24(1)           | -4(1)           | -14(1)          | 7(1)            |
| N(2A)  | 44(1)           | 9(1)            | 23(1)           | -4(1)           | -12(1)          | 10(1)           |
| C(13A) | 35(1)           | 22(1)           | 23(1)           | -9(1)           | -12(1)          | 18(1)           |
| N(3A)  | 44(1)           | 9(1)            | 23(1)           | -4(1)           | -12(1)          | 10(1)           |
| C(16A) | 38(1)           | 18(1)           | 28(1)           | 2(1)            | -2(1)           | 9(1)            |
| C(17A) | 38(1)           | 18(1)           | 28(1)           | 2(1)            | -2(1)           | 9(1)            |
| C(18A) | 38(1)           | 18(1)           | 28(1)           | 2(1)            | -2(1)           | 9(1)            |
| C(19A) | 38(1)           | 18(1)           | 28(1)           | 2(1)            | -2(1)           | 9(1)            |
| C(20A) | 38(1)           | 18(1)           | 28(1)           | 2(1)            | -2(1)           | 9(1)            |
| C(1A)  | 23(1)           | 22(1)           | 15(1)           | -2(1)           | 2(1)            | -2(1)           |
| C(2A)  | 23(1)           | 22(1)           | 15(1)           | -2(1)           | 2(1)            | -2(1)           |
| C(3A)  | 19(2)           | 12(2)           | 23(2)           | -7(2)           | 11(1)           | -7(1)           |
| C(5A)  | 28(2)           | 22(2)           | 12(2)           | 4(2)            | 2(2)            | -14(2)          |
| C(4A)  | 30(2)           | 21(2)           | 25(2)           | -3(2)           | -4(2)           | 3(2)            |
| C(6A)  | 23(1)           | 22(1)           | 15(1)           | -2(1)           | 2(1)            | -2(1)           |

Electronic Supplementary Information for Dalton Transactions  
This journal is © The Royal Society of Chemistry 2005

|        |       |       |       |        |        |        |
|--------|-------|-------|-------|--------|--------|--------|
| N(4A)  | 44(1) | 9(1)  | 23(1) | -4(1)  | -12(1) | 10(1)  |
| C(22A) | 54(1) | 13(1) | 24(1) | -4(1)  | -14(1) | 7(1)   |
| C(23A) | 54(1) | 13(1) | 24(1) | -4(1)  | -14(1) | 7(1)   |
| N(5A)  | 44(1) | 9(1)  | 23(1) | -4(1)  | -12(1) | 10(1)  |
| C(21A) | 35(1) | 22(1) | 23(1) | -9(1)  | -12(1) | 18(1)  |
| C(24A) | 41(2) | 44(2) | 14(2) | 2(2)   | -13(2) | -9(2)  |
| C(25A) | 24(2) | 44(2) | 34(2) | -4(2)  | -11(2) | 0(2)   |
| C(26A) | 52(2) | 47(2) | 28(2) | -2(2)  | -15(2) | -23(2) |
| C(27A) | 43(2) | 60(2) | 14(2) | -16(2) | -2(2)  | -33(2) |
| C(28A) | 36(2) | 79(3) | 30(2) | -11(2) | 3(2)   | -14(2) |
| C(29A) | 38(2) | 61(3) | 20(2) | -2(2)  | -1(2)  | -2(2)  |
| C(7A)  | 45(1) | 48(1) | 23(1) | -1(1)  | 2(1)   | 19(1)  |
| C(11A) | 37(1) | 36(1) | 23(1) | 2(1)   | 8(1)   | 1(1)   |
| C(12A) | 37(1) | 36(1) | 23(1) | 2(1)   | 8(1)   | 1(1)   |
| C(10A) | 45(1) | 48(1) | 23(1) | -1(1)  | 2(1)   | 19(1)  |
| C(9A)  | 37(1) | 36(1) | 23(1) | 2(1)   | 8(1)   | 1(1)   |
| C(8A)  | 37(1) | 36(1) | 23(1) | 2(1)   | 8(1)   | 1(1)   |
| C(30A) | 39(2) | 33(2) | 36(2) | 4(2)   | -4(2)  | -17(2) |
| C(31A) | 39(2) | 52(3) | 33(2) | -8(2)  | -14(2) | -19(2) |
| C(32A) | 49(3) | 43(3) | 46(3) | 22(2)  | -27(2) | -3(2)  |
| C(33A) | 45(1) | 48(1) | 23(1) | -1(1)  | 2(1)   | 19(1)  |
| C(34A) | 89(1) | 88(1) | 88(1) | 0(1)   | 5(1)   | 0(1)   |
| C(35A) | 89(1) | 88(1) | 88(1) | 0(1)   | 5(1)   | 0(1)   |
| Mn(1B) | 24(1) | 22(1) | 14(1) | -1(1)  | 0(1)   | -1(1)  |
| Br(1B) | 32(1) | 32(1) | 23(1) | 0(1)   | -3(1)  | 0(1)   |
| Br(2B) | 32(1) | 32(1) | 23(1) | 0(1)   | -3(1)  | 0(1)   |
| N(1B)  | 44(1) | 9(1)  | 23(1) | -4(1)  | -12(1) | 10(1)  |
| C(14B) | 54(1) | 13(1) | 24(1) | -4(1)  | -14(1) | 7(1)   |
| C(15B) | 54(1) | 13(1) | 24(1) | -4(1)  | -14(1) | 7(1)   |
| N(2B)  | 44(1) | 9(1)  | 23(1) | -4(1)  | -12(1) | 10(1)  |
| C(13B) | 35(1) | 22(1) | 23(1) | -9(1)  | -12(1) | 18(1)  |
| N(3B)  | 44(1) | 9(1)  | 23(1) | -4(1)  | -12(1) | 10(1)  |
| C(16B) | 38(1) | 18(1) | 28(1) | 2(1)   | -2(1)  | 9(1)   |
| C(17B) | 38(1) | 18(1) | 28(1) | 2(1)   | -2(1)  | 9(1)   |
| C(18B) | 38(1) | 18(1) | 28(1) | 2(1)   | -2(1)  | 9(1)   |

Electronic Supplementary Information for Dalton Transactions  
This journal is © The Royal Society of Chemistry 2005

|        |       |       |       |        |        |        |
|--------|-------|-------|-------|--------|--------|--------|
| C(19B) | 38(1) | 18(1) | 28(1) | 2(1)   | -2(1)  | 9(1)   |
| C(20B) | 38(1) | 18(1) | 28(1) | 2(1)   | -2(1)  | 9(1)   |
| C(1B)  | 23(1) | 22(1) | 15(1) | -2(1)  | 2(1)   | -2(1)  |
| C(2B)  | 23(1) | 22(1) | 15(1) | -2(1)  | 2(1)   | -2(1)  |
| C(3B)  | 26(2) | 31(2) | 12(2) | 7(2)   | 9(2)   | -10(2) |
| C(4B)  | 34(2) | 30(2) | 22(2) | 5(2)   | 8(2)   | -11(2) |
| C(5B)  | 25(2) | 33(2) | 12(2) | 12(2)  | 1(2)   | -10(2) |
| C(6B)  | 23(1) | 22(1) | 15(1) | -2(1)  | 2(1)   | -2(1)  |
| N(4B)  | 44(1) | 9(1)  | 23(1) | -4(1)  | -12(1) | 10(1)  |
| C(22B) | 54(1) | 13(1) | 24(1) | -4(1)  | -14(1) | 7(1)   |
| C(23B) | 54(1) | 13(1) | 24(1) | -4(1)  | -14(1) | 7(1)   |
| N(5B)  | 44(1) | 9(1)  | 23(1) | -4(1)  | -12(1) | 10(1)  |
| C(21B) | 35(1) | 22(1) | 23(1) | -9(1)  | -12(1) | 18(1)  |
| C(7B)  | 45(1) | 48(1) | 23(1) | -1(1)  | 2(1)   | 19(1)  |
| C(11B) | 37(1) | 36(1) | 23(1) | 2(1)   | 8(1)   | 1(1)   |
| C(24B) | 14(2) | 39(2) | 27(2) | -4(2)  | 4(2)   | -4(2)  |
| C(25B) | 35(2) | 30(2) | 33(2) | -11(2) | -7(2)  | -14(2) |
| C(26B) | 35(2) | 44(2) | 36(2) | -16(2) | -13(2) | -19(2) |
| C(27B) | 42(2) | 46(2) | 30(2) | -27(2) | -11(2) | -15(2) |
| C(28B) | 40(2) | 55(3) | 29(2) | -26(2) | 6(2)   | 7(2)   |
| C(29B) | 30(2) | 68(3) | 21(2) | -13(2) | -3(2)  | 22(2)  |
| C(12B) | 37(1) | 36(1) | 23(1) | 2(1)   | 8(1)   | 1(1)   |
| C(10B) | 45(1) | 48(1) | 23(1) | -1(1)  | 2(1)   | 19(1)  |
| C(9B)  | 37(1) | 36(1) | 23(1) | 2(1)   | 8(1)   | 1(1)   |
| C(8B)  | 37(1) | 36(1) | 23(1) | 2(1)   | 8(1)   | 1(1)   |
| C(30B) | 21(2) | 37(2) | 41(2) | -6(2)  | 6(2)   | 12(2)  |
| C(31B) | 56(3) | 14(2) | 54(3) | -10(2) | -15(3) | -7(2)  |
| C(32B) | 63(3) | 20(2) | 47(3) | 8(2)   | -6(3)  | 21(2)  |
| C(33B) | 45(1) | 48(1) | 23(1) | -1(1)  | 2(1)   | 19(1)  |
| C(34B) | 89(1) | 88(1) | 88(1) | 0(1)   | 5(1)   | 0(1)   |
| C(35B) | 89(1) | 88(1) | 88(1) | 0(1)   | 5(1)   | 0(1)   |

---

### Structural Data for 4

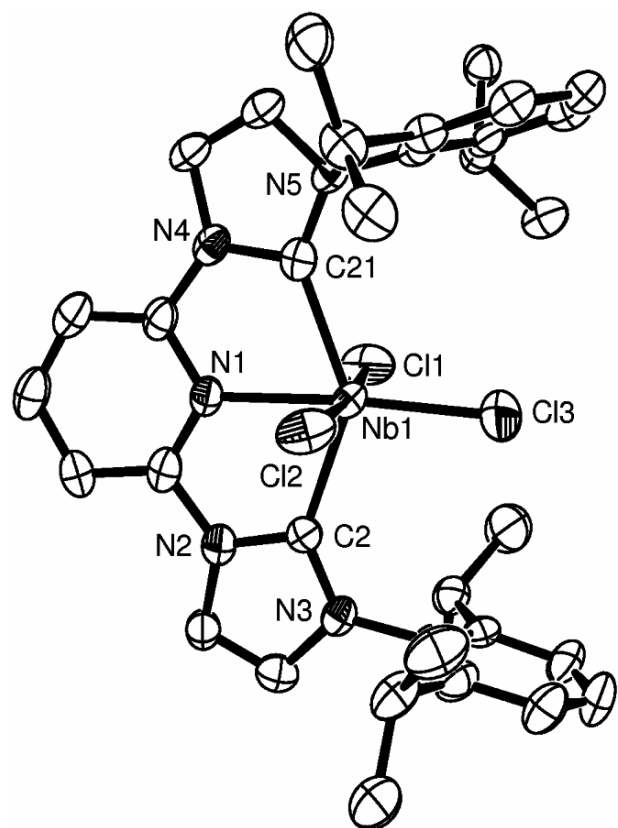

Table 9. Crystal data and structure refinement for **4**.

|                                   |                                                                     |                |
|-----------------------------------|---------------------------------------------------------------------|----------------|
| Identification code               | 4                                                                   |                |
| Empirical formula                 | C <sub>39</sub> H <sub>49</sub> Cl <sub>3</sub> N <sub>5</sub> Nb O |                |
| Formula weight                    | 803.09                                                              |                |
| Temperature                       | 120(2) K                                                            |                |
| Wavelength                        | 0.71073 Å                                                           |                |
| Crystal system                    | Monoclinic                                                          |                |
| Space group                       | P21/c                                                               |                |
| Unit cell dimensions              | a = 10.803(7) Å                                                     | α = 90°.       |
|                                   | b = 18.707(11) Å                                                    | β = 92.61(6)°. |
|                                   | c = 18.838(17) Å                                                    | γ = 90°.       |
| Volume                            | 3803(5) Å <sup>3</sup>                                              |                |
| Z                                 | 4                                                                   |                |
| Density (calculated)              | 1.403 Mg/m <sup>3</sup>                                             |                |
| Absorption coefficient            | 0.565 mm <sup>-1</sup>                                              |                |
| F(000)                            | 1672                                                                |                |
| Crystal size                      | 0.06 x 0.04 x 0.01 mm <sup>3</sup>                                  |                |
| Theta range for data collection   | 3.77 to 27.56°.                                                     |                |
| Index ranges                      | -13 ≤ h ≤ 14, -23 ≤ k ≤ 24, -24 ≤ l ≤ 18                            |                |
| Reflections collected             | 26634                                                               |                |
| Independent reflections           | 8730 [R(int) = 0.1325]                                              |                |
| Completeness to theta = 27.56°    | 99.3 %                                                              |                |
| Absorption correction             | Semi-empirical from equivalents                                     |                |
| Max. and min. transmission        | 0.9944 and 0.6249                                                   |                |
| Refinement method                 | Full-matrix least-squares on F <sup>2</sup>                         |                |
| Data / restraints / parameters    | 8730 / 8 / 460                                                      |                |
| Goodness-of-fit on F <sup>2</sup> | 1.012                                                               |                |
| Final R indices [I > 2σ(I)]       | R1 = 0.0902, wR2 = 0.1446                                           |                |
| R indices (all data)              | R1 = 0.1973, wR2 = 0.1774                                           |                |
| Largest diff. peak and hole       | 1.069 and -0.512 e.Å <sup>-3</sup>                                  |                |

Table 10. Atomic coordinates ( $\times 10^4$ ) and equivalent isotropic displacement parameters ( $\text{\AA}^2 \times 10^3$ ) for **4**.  $U(\text{eq})$  is defined as one third of the trace of the orthogonalized  $U^{\text{ij}}$  tensor.

|       | x        | y       | z        | U(eq) |
|-------|----------|---------|----------|-------|
| C(1)  | 4103(5)  | 1845(3) | -613(4)  | 33(2) |
| C(2)  | 2707(5)  | 2503(3) | 75(3)    | 27(1) |
| C(3)  | 1594(6)  | 3075(3) | -796(4)  | 38(2) |
| C(4)  | 2439(6)  | 2688(3) | -1114(4) | 35(2) |
| C(5)  | 1022(5)  | 3315(3) | 459(3)   | 33(2) |
| C(6)  | -102(5)  | 2993(3) | 619(3)   | 38(2) |
| C(7)  | -833(7)  | 3366(4) | 1090(4)  | 53(2) |
| C(8)  | -447(7)  | 4006(4) | 1375(4)  | 62(2) |
| C(9)  | 666(7)   | 4298(3) | 1203(4)  | 53(2) |
| C(10) | 1428(6)  | 3970(3) | 725(4)   | 43(2) |
| C(11) | 2624(6)  | 4325(3) | 529(4)   | 47(2) |
| C(12) | 3419(7)  | 4515(4) | 1189(5)  | 62(2) |
| C(13) | 2348(7)  | 4990(3) | 73(4)    | 57(2) |
| C(14) | -558(6)  | 2300(3) | 302(4)   | 40(2) |
| C(15) | -990(7)  | 1780(4) | 860(5)   | 65(2) |
| C(16) | -1604(7) | 2454(4) | -241(4)  | 59(2) |
| C(17) | 4630(6)  | 1661(3) | -1245(4) | 39(2) |
| C(18) | 5575(6)  | 1156(3) | -1192(4) | 45(2) |
| C(19) | 5931(6)  | 858(3)  | -551(4)  | 41(2) |
| C(20) | 5342(5)  | 1087(3) | 43(4)    | 34(2) |
| C(21) | 4999(5)  | 1156(3) | 1275(4)  | 31(2) |
| C(22) | 6347(5)  | 307(3)  | 1674(4)  | 36(2) |
| C(23) | 6425(5)  | 320(3)  | 979(4)   | 36(2) |
| C(24) | 5302(5)  | 1013(3) | 2595(3)  | 32(2) |
| C(25) | 4281(5)  | 743(3)  | 2946(4)  | 34(2) |
| C(26) | 4205(6)  | 908(3)  | 3654(4)  | 40(2) |
| C(27) | 5070(6)  | 1329(3) | 4006(4)  | 39(2) |
| C(28) | 6064(6)  | 1596(3) | 3643(4)  | 38(2) |
| C(29) | 6197(5)  | 1448(3) | 2930(4)  | 33(2) |
| C(30) | 7298(6)  | 1740(3) | 2549(4)  | 41(2) |

Electronic Supplementary Information for Dalton Transactions  
This journal is © The Royal Society of Chemistry 2005

|        |          |          |          |       |
|--------|----------|----------|----------|-------|
| C(31)  | 7407(6)  | 2551(3)  | 2651(4)  | 50(2) |
| C(32)  | 8498(6)  | 1364(4)  | 2819(4)  | 52(2) |
| C(33)  | 3312(5)  | 259(3)   | 2590(4)  | 33(2) |
| C(34)  | 3459(6)  | -498(3)  | 2884(4)  | 39(2) |
| C(35)  | 1991(5)  | 536(3)   | 2691(4)  | 42(2) |
| C(36A) | 1040(20) | 4040(20) | 3054(14) | 47(4) |
| C(37A) | -18(9)   | 3661(4)  | 3390(6)  | 98(4) |
| C(38A) | -535(7)  | 4229(4)  | 3849(5)  | 70(3) |
| C(39A) | 645(14)  | 4501(11) | 4182(13) | 62(4) |
| C(36B) | 1246(12) | 3894(8)  | 3207(9)  | 47(4) |
| C(37B) | -18(9)   | 3661(4)  | 3390(6)  | 98(4) |
| C(38B) | -535(7)  | 4229(4)  | 3849(5)  | 70(3) |
| C(39B) | 358(10)  | 4862(6)  | 3718(7)  | 62(4) |
| Cl(1)  | 2114(1)  | 966(1)   | 822(1)   | 53(1) |
| Cl(2)  | 5260(2)  | 2905(1)  | 1087(1)  | 49(1) |
| Cl(3)  | 2635(2)  | 2458(1)  | 2000(1)  | 81(1) |
| N(1)   | 4454(4)  | 1592(2)  | 23(3)    | 30(1) |
| N(2)   | 3126(4)  | 2340(2)  | -580(3)  | 31(1) |
| N(3)   | 1759(4)  | 2965(2)  | -70(3)   | 31(1) |
| N(4)   | 5596(4)  | 844(2)   | 725(3)   | 33(1) |
| N(5)   | 5478(4)  | 821(2)   | 1865(3)  | 31(1) |
| Nb(1)  | 3608(1)  | 1989(1)  | 1018(1)  | 33(1) |
| O(1A)  | 1608(12) | 4171(7)  | 3771(10) | 66(2) |
| O(1B)  | 1064(7)  | 4653(4)  | 3113(5)  | 66(2) |

---

Table 11. Bond lengths [ $\text{\AA}$ ] and angles [ $^\circ$ ] for 04neo008.

---

|              |           |
|--------------|-----------|
| C(1)-N(1)    | 1.329(8)  |
| C(1)-C(17)   | 1.386(8)  |
| C(1)-N(2)    | 1.406(7)  |
| C(2)-N(3)    | 1.359(7)  |
| C(2)-N(2)    | 1.370(7)  |
| C(2)-Nb(1)   | 2.206(6)  |
| C(3)-C(4)    | 1.329(8)  |
| C(3)-N(3)    | 1.387(8)  |
| C(3)-H(3)    | 0.9500    |
| C(4)-N(2)    | 1.386(8)  |
| C(4)-H(4)    | 0.9500    |
| C(5)-C(10)   | 1.387(8)  |
| C(5)-C(6)    | 1.401(8)  |
| C(5)-N(3)    | 1.458(7)  |
| C(6)-C(7)    | 1.401(8)  |
| C(6)-C(14)   | 1.501(9)  |
| C(7)-C(8)    | 1.370(10) |
| C(7)-H(7)    | 0.9500    |
| C(8)-C(9)    | 1.372(10) |
| C(8)-H(8)    | 0.9500    |
| C(9)-C(10)   | 1.390(9)  |
| C(9)-H(9)    | 0.9500    |
| C(10)-C(11)  | 1.514(9)  |
| C(11)-C(12)  | 1.520(11) |
| C(11)-C(13)  | 1.532(10) |
| C(11)-H(11)  | 1.0000    |
| C(12)-H(12A) | 0.9800    |
| C(12)-H(12B) | 0.9800    |
| C(12)-H(12C) | 0.9800    |
| C(13)-H(13A) | 0.9800    |
| C(13)-H(13B) | 0.9800    |
| C(13)-H(13C) | 0.9800    |
| C(14)-C(16)  | 1.516(10) |



Electronic Supplementary Information for Dalton Transactions  
This journal is © The Royal Society of Chemistry 2005

|              |           |
|--------------|-----------|
| C(14)-C(15)  | 1.521(9)  |
| C(14)-H(14)  | 1.0000    |
| C(15)-H(15A) | 0.9800    |
| C(15)-H(15B) | 0.9800    |
| C(15)-H(15C) | 0.9800    |
| C(16)-H(16A) | 0.9800    |
| C(16)-H(16B) | 0.9800    |
| C(16)-H(16C) | 0.9800    |
| C(17)-C(18)  | 1.391(9)  |
| C(17)-H(17)  | 0.9500    |
| C(18)-C(19)  | 1.369(10) |
| C(18)-H(18)  | 0.9500    |
| C(19)-C(20)  | 1.381(8)  |
| C(19)-H(19)  | 0.9500    |
| C(20)-N(1)   | 1.345(7)  |
| C(20)-N(4)   | 1.378(8)  |
| C(21)-N(5)   | 1.358(8)  |
| C(21)-N(4)   | 1.376(7)  |
| C(21)-Nb(1)  | 2.203(6)  |
| C(22)-C(23)  | 1.316(9)  |
| C(22)-N(5)   | 1.402(7)  |
| C(22)-H(22)  | 0.9500    |
| C(23)-N(4)   | 1.398(7)  |
| C(23)-H(23)  | 0.9500    |
| C(24)-C(29)  | 1.394(8)  |
| C(24)-C(25)  | 1.406(8)  |
| C(24)-N(5)   | 1.442(8)  |
| C(25)-C(26)  | 1.375(9)  |
| C(25)-C(33)  | 1.517(9)  |
| C(26)-C(27)  | 1.370(9)  |
| C(26)-H(26)  | 0.9500    |
| C(27)-C(28)  | 1.392(8)  |
| C(27)-H(27)  | 0.9500    |
| C(28)-C(29)  | 1.384(9)  |
| C(28)-H(28)  | 0.9500    |

Electronic Supplementary Information for Dalton Transactions  
This journal is © The Royal Society of Chemistry 2005

|               |           |
|---------------|-----------|
| C(29)-C(30)   | 1.518(8)  |
| C(30)-C(31)   | 1.535(8)  |
| C(30)-C(32)   | 1.541(9)  |
| C(30)-H(30)   | 1.0000    |
| C(31)-H(31A)  | 0.9800    |
| C(31)-H(31B)  | 0.9800    |
| C(31)-H(31C)  | 0.9800    |
| C(32)-H(32A)  | 0.9800    |
| C(32)-H(32B)  | 0.9800    |
| C(32)-H(32C)  | 0.9800    |
| C(33)-C(34)   | 1.527(8)  |
| C(33)-C(35)   | 1.539(8)  |
| C(33)-H(33)   | 1.0000    |
| C(34)-H(34A)  | 0.9800    |
| C(34)-H(34B)  | 0.9800    |
| C(34)-H(34C)  | 0.9800    |
| C(35)-H(35A)  | 0.9800    |
| C(35)-H(35B)  | 0.9800    |
| C(35)-H(35C)  | 0.9800    |
| C(36A)-O(1A)  | 1.48(2)   |
| C(36A)-C(37A) | 1.508(19) |
| C(36A)-H(36A) | 0.9900    |
| C(36A)-H(36B) | 0.9900    |
| C(37A)-C(38A) | 1.493(11) |
| C(37A)-H(37A) | 0.9900    |
| C(37A)-H(37B) | 0.9900    |
| C(38A)-C(39A) | 1.485(15) |
| C(38A)-H(38A) | 0.9900    |
| C(38A)-H(38B) | 0.9900    |
| C(39A)-O(1A)  | 1.462(16) |
| C(39A)-H(39A) | 0.9900    |
| C(39A)-H(39B) | 0.9900    |
| C(36B)-O(1B)  | 1.444(15) |
| C(36B)-H(36C) | 0.9900    |
| C(36B)-H(36D) | 0.9900    |

Electronic Supplementary Information for Dalton Transactions  
This journal is © The Royal Society of Chemistry 2005

|                 |           |
|-----------------|-----------|
| C(39B)-O(1B)    | 1.454(11) |
| C(39B)-H(39C)   | 0.9900    |
| C(39B)-H(39D)   | 0.9900    |
| Cl(1)-Nb(1)     | 2.520(2)  |
| Cl(2)-Nb(1)     | 2.473(2)  |
| Cl(3)-Nb(1)     | 2.341(3)  |
| N(1)-Nb(1)      | 2.248(5)  |
|                 |           |
| N(1)-C(1)-C(17) | 125.1(6)  |
| N(1)-C(1)-N(2)  | 112.2(5)  |
| C(17)-C(1)-N(2) | 122.7(6)  |
| N(3)-C(2)-N(2)  | 103.8(5)  |
| N(3)-C(2)-Nb(1) | 137.8(4)  |
| N(2)-C(2)-Nb(1) | 118.4(4)  |
| C(4)-C(3)-N(3)  | 107.8(6)  |
| C(4)-C(3)-H(3)  | 126.1     |
| N(3)-C(3)-H(3)  | 126.1     |
| C(3)-C(4)-N(2)  | 106.5(6)  |
| C(3)-C(4)-H(4)  | 126.7     |
| N(2)-C(4)-H(4)  | 126.7     |
| C(10)-C(5)-C(6) | 124.4(6)  |
| C(10)-C(5)-N(3) | 118.0(5)  |
| C(6)-C(5)-N(3)  | 117.4(5)  |
| C(5)-C(6)-C(7)  | 116.2(6)  |
| C(5)-C(6)-C(14) | 123.9(5)  |
| C(7)-C(6)-C(14) | 119.9(6)  |
| C(8)-C(7)-C(6)  | 120.8(7)  |
| C(8)-C(7)-H(7)  | 119.6     |
| C(6)-C(7)-H(7)  | 119.6     |
| C(7)-C(8)-C(9)  | 120.7(6)  |
| C(7)-C(8)-H(8)  | 119.7     |
| C(9)-C(8)-H(8)  | 119.7     |
| C(8)-C(9)-C(10) | 121.9(7)  |
| C(8)-C(9)-H(9)  | 119.1     |
| C(10)-C(9)-H(9) | 119.1     |

Electronic Supplementary Information for Dalton Transactions  
This journal is © The Royal Society of Chemistry 2005

|                     |          |
|---------------------|----------|
| C(5)-C(10)-C(9)     | 116.0(6) |
| C(5)-C(10)-C(11)    | 124.0(6) |
| C(9)-C(10)-C(11)    | 120.0(6) |
| C(10)-C(11)-C(12)   | 111.1(6) |
| C(10)-C(11)-C(13)   | 110.3(6) |
| C(12)-C(11)-C(13)   | 110.9(6) |
| C(10)-C(11)-H(11)   | 108.1    |
| C(12)-C(11)-H(11)   | 108.1    |
| C(13)-C(11)-H(11)   | 108.1    |
| C(11)-C(12)-H(12A)  | 109.5    |
| C(11)-C(12)-H(12B)  | 109.5    |
| H(12A)-C(12)-H(12B) | 109.5    |
| C(11)-C(12)-H(12C)  | 109.5    |
| H(12A)-C(12)-H(12C) | 109.5    |
| H(12B)-C(12)-H(12C) | 109.5    |
| C(11)-C(13)-H(13A)  | 109.5    |
| C(11)-C(13)-H(13B)  | 109.5    |
| H(13A)-C(13)-H(13B) | 109.5    |
| C(11)-C(13)-H(13C)  | 109.5    |
| H(13A)-C(13)-H(13C) | 109.5    |
| H(13B)-C(13)-H(13C) | 109.5    |
| C(6)-C(14)-C(16)    | 109.0(5) |
| C(6)-C(14)-C(15)    | 112.4(6) |
| C(16)-C(14)-C(15)   | 110.2(6) |
| C(6)-C(14)-H(14)    | 108.4    |
| C(16)-C(14)-H(14)   | 108.4    |
| C(15)-C(14)-H(14)   | 108.4    |
| C(14)-C(15)-H(15A)  | 109.5    |
| C(14)-C(15)-H(15B)  | 109.5    |
| H(15A)-C(15)-H(15B) | 109.5    |
| C(14)-C(15)-H(15C)  | 109.5    |
| H(15A)-C(15)-H(15C) | 109.5    |
| H(15B)-C(15)-H(15C) | 109.5    |
| C(14)-C(16)-H(16A)  | 109.5    |
| C(14)-C(16)-H(16B)  | 109.5    |

Electronic Supplementary Information for Dalton Transactions  
This journal is © The Royal Society of Chemistry 2005

|                     |          |
|---------------------|----------|
| H(16A)-C(16)-H(16B) | 109.5    |
| C(14)-C(16)-H(16C)  | 109.5    |
| H(16A)-C(16)-H(16C) | 109.5    |
| H(16B)-C(16)-H(16C) | 109.5    |
| C(1)-C(17)-C(18)    | 115.9(7) |
| C(1)-C(17)-H(17)    | 122.1    |
| C(18)-C(17)-H(17)   | 122.1    |
| C(19)-C(18)-C(17)   | 121.0(6) |
| C(19)-C(18)-H(18)   | 119.5    |
| C(17)-C(18)-H(18)   | 119.5    |
| C(18)-C(19)-C(20)   | 117.9(6) |
| C(18)-C(19)-H(19)   | 121.1    |
| C(20)-C(19)-H(19)   | 121.1    |
| N(1)-C(20)-N(4)     | 111.7(5) |
| N(1)-C(20)-C(19)    | 123.3(7) |
| N(4)-C(20)-C(19)    | 125.0(6) |
| N(5)-C(21)-N(4)     | 104.3(5) |
| N(5)-C(21)-Nb(1)    | 137.5(4) |
| N(4)-C(21)-Nb(1)    | 118.2(5) |
| C(23)-C(22)-N(5)    | 108.5(6) |
| C(23)-C(22)-H(22)   | 125.8    |
| N(5)-C(22)-H(22)    | 125.8    |
| C(22)-C(23)-N(4)    | 106.5(5) |
| C(22)-C(23)-H(23)   | 126.7    |
| N(4)-C(23)-H(23)    | 126.7    |
| C(29)-C(24)-C(25)   | 122.6(6) |
| C(29)-C(24)-N(5)    | 117.4(5) |
| C(25)-C(24)-N(5)    | 120.0(6) |
| C(26)-C(25)-C(24)   | 117.3(6) |
| C(26)-C(25)-C(33)   | 119.6(5) |
| C(24)-C(25)-C(33)   | 123.1(6) |
| C(27)-C(26)-C(25)   | 122.0(6) |
| C(27)-C(26)-H(26)   | 119.0    |
| C(25)-C(26)-H(26)   | 119.0    |
| C(26)-C(27)-C(28)   | 119.5(7) |

Electronic Supplementary Information for Dalton Transactions  
This journal is © The Royal Society of Chemistry 2005

|                     |          |
|---------------------|----------|
| C(26)-C(27)-H(27)   | 120.2    |
| C(28)-C(27)-H(27)   | 120.2    |
| C(29)-C(28)-C(27)   | 121.5(6) |
| C(29)-C(28)-H(28)   | 119.3    |
| C(27)-C(28)-H(28)   | 119.3    |
| C(28)-C(29)-C(24)   | 117.1(5) |
| C(28)-C(29)-C(30)   | 120.4(6) |
| C(24)-C(29)-C(30)   | 122.5(6) |
| C(29)-C(30)-C(31)   | 110.7(5) |
| C(29)-C(30)-C(32)   | 110.2(5) |
| C(31)-C(30)-C(32)   | 110.6(6) |
| C(29)-C(30)-H(30)   | 108.4    |
| C(31)-C(30)-H(30)   | 108.4    |
| C(32)-C(30)-H(30)   | 108.4    |
| C(30)-C(31)-H(31A)  | 109.5    |
| C(30)-C(31)-H(31B)  | 109.5    |
| H(31A)-C(31)-H(31B) | 109.5    |
| C(30)-C(31)-H(31C)  | 109.5    |
| H(31A)-C(31)-H(31C) | 109.5    |
| H(31B)-C(31)-H(31C) | 109.5    |
| C(30)-C(32)-H(32A)  | 109.5    |
| C(30)-C(32)-H(32B)  | 109.5    |
| H(32A)-C(32)-H(32B) | 109.5    |
| C(30)-C(32)-H(32C)  | 109.5    |
| H(32A)-C(32)-H(32C) | 109.5    |
| H(32B)-C(32)-H(32C) | 109.5    |
| C(25)-C(33)-C(34)   | 109.6(5) |
| C(25)-C(33)-C(35)   | 111.7(5) |
| C(34)-C(33)-C(35)   | 110.4(5) |
| C(25)-C(33)-H(33)   | 108.4    |
| C(34)-C(33)-H(33)   | 108.4    |
| C(35)-C(33)-H(33)   | 108.4    |
| C(33)-C(34)-H(34A)  | 109.5    |
| C(33)-C(34)-H(34B)  | 109.5    |
| H(34A)-C(34)-H(34B) | 109.5    |

Electronic Supplementary Information for Dalton Transactions  
This journal is © The Royal Society of Chemistry 2005

|                      |           |
|----------------------|-----------|
| C(33)-C(34)-H(34C)   | 109.5     |
| H(34A)-C(34)-H(34C)  | 109.5     |
| H(34B)-C(34)-H(34C)  | 109.5     |
| C(33)-C(35)-H(35A)   | 109.5     |
| C(33)-C(35)-H(35B)   | 109.5     |
| H(35A)-C(35)-H(35B)  | 109.5     |
| C(33)-C(35)-H(35C)   | 109.5     |
| H(35A)-C(35)-H(35C)  | 109.5     |
| H(35B)-C(35)-H(35C)  | 109.5     |
| O(1A)-C(36A)-C(37A)  | 89.2(14)  |
| O(1A)-C(36A)-H(36A)  | 113.8     |
| C(37A)-C(36A)-H(36A) | 113.8     |
| O(1A)-C(36A)-H(36B)  | 113.8     |
| C(37A)-C(36A)-H(36B) | 113.8     |
| H(36A)-C(36A)-H(36B) | 111.0     |
| C(38A)-C(37A)-C(36A) | 102.8(16) |
| C(38A)-C(37A)-H(37A) | 111.2     |
| C(36A)-C(37A)-H(37A) | 111.2     |
| C(38A)-C(37A)-H(37B) | 111.2     |
| C(36A)-C(37A)-H(37B) | 111.2     |
| H(37A)-C(37A)-H(37B) | 109.1     |
| C(39A)-C(38A)-C(37A) | 98.7(9)   |
| C(39A)-C(38A)-H(38A) | 112.0     |
| C(37A)-C(38A)-H(38A) | 112.0     |
| C(39A)-C(38A)-H(38B) | 112.0     |
| C(37A)-C(38A)-H(38B) | 112.0     |
| H(38A)-C(38A)-H(38B) | 109.7     |
| O(1A)-C(39A)-C(38A)  | 104.4(13) |
| O(1A)-C(39A)-H(39A)  | 110.9     |
| C(38A)-C(39A)-H(39A) | 110.9     |
| O(1A)-C(39A)-H(39B)  | 110.9     |
| C(38A)-C(39A)-H(39B) | 110.9     |
| H(39A)-C(39A)-H(39B) | 108.9     |
| O(1B)-C(36B)-H(36C)  | 111.5     |
| O(1B)-C(36B)-H(36D)  | 111.5     |

Electronic Supplementary Information for Dalton Transactions  
This journal is © The Royal Society of Chemistry 2005

|                      |            |
|----------------------|------------|
| H(36C)-C(36B)-H(36D) | 109.3      |
| O(1B)-C(39B)-H(39C)  | 110.6      |
| O(1B)-C(39B)-H(39D)  | 110.6      |
| H(39C)-C(39B)-H(39D) | 108.7      |
| C(1)-N(1)-C(20)      | 116.7(5)   |
| C(1)-N(1)-Nb(1)      | 121.6(4)   |
| C(20)-N(1)-Nb(1)     | 121.7(5)   |
| C(2)-N(2)-C(4)       | 111.2(5)   |
| C(2)-N(2)-C(1)       | 117.8(5)   |
| C(4)-N(2)-C(1)       | 131.0(5)   |
| C(2)-N(3)-C(3)       | 110.7(5)   |
| C(2)-N(3)-C(5)       | 125.3(5)   |
| C(3)-N(3)-C(5)       | 124.0(5)   |
| C(21)-N(4)-C(20)     | 118.8(5)   |
| C(21)-N(4)-C(23)     | 110.7(6)   |
| C(20)-N(4)-C(23)     | 130.4(5)   |
| C(21)-N(5)-C(22)     | 110.0(5)   |
| C(21)-N(5)-C(24)     | 127.1(5)   |
| C(22)-N(5)-C(24)     | 122.3(6)   |
| C(21)-Nb(1)-C(2)     | 139.2(2)   |
| C(21)-Nb(1)-N(1)     | 69.5(2)    |
| C(2)-Nb(1)-N(1)      | 69.8(2)    |
| C(21)-Nb(1)-Cl(3)    | 114.66(18) |
| C(2)-Nb(1)-Cl(3)     | 105.98(16) |
| N(1)-Nb(1)-Cl(3)     | 175.79(15) |
| C(21)-Nb(1)-Cl(2)    | 89.73(15)  |
| C(2)-Nb(1)-Cl(2)     | 91.79(15)  |
| N(1)-Nb(1)-Cl(2)     | 87.35(13)  |
| Cl(3)-Nb(1)-Cl(2)    | 92.73(9)   |
| C(21)-Nb(1)-Cl(1)    | 85.47(15)  |
| C(2)-Nb(1)-Cl(1)     | 87.54(15)  |
| N(1)-Nb(1)-Cl(1)     | 84.75(13)  |
| Cl(3)-Nb(1)-Cl(1)    | 95.30(9)   |
| Cl(2)-Nb(1)-Cl(1)    | 171.81(6)  |
| C(39A)-O(1A)-C(36A)  | 106.2(19)  |



Electronic Supplementary Information for Dalton Transactions  
This journal is © The Royal Society of Chemistry 2005

C(36B)-O(1B)-C(39B)      104.0(10)

---

Symmetry transformations used to generate equivalent atoms:

Table 12. Anisotropic displacement parameters ( $\text{\AA}^2 \times 10^3$ ) for **4**. The anisotropic displacement factor exponent takes the form:  $-2\pi^2 [ h^2 a^{*2} U^{11} + \dots + 2 h k a^* b^* U^{12} ]$

|       | $U^{11}$ | $U^{22}$ | $U^{33}$ | $U^{23}$ | $U^{13}$ | $U^{12}$ |
|-------|----------|----------|----------|----------|----------|----------|
| C(1)  | 29(3)    | 29(3)    | 41(5)    | -7(3)    | 9(3)     | -8(3)    |
| C(2)  | 24(3)    | 24(3)    | 34(4)    | 1(3)     | 2(3)     | -5(2)    |
| C(3)  | 40(4)    | 35(3)    | 37(5)    | 3(3)     | -5(3)    | -1(3)    |
| C(4)  | 35(3)    | 39(3)    | 32(4)    | -1(3)    | 5(3)     | 2(3)     |
| C(5)  | 29(3)    | 34(3)    | 36(4)    | -1(3)    | 0(3)     | 12(3)    |
| C(6)  | 32(3)    | 44(4)    | 38(4)    | 11(3)    | 2(3)     | 17(3)    |
| C(7)  | 45(4)    | 53(4)    | 64(6)    | 7(4)     | 24(4)    | 21(4)    |
| C(8)  | 61(5)    | 69(5)    | 57(6)    | -10(4)   | 23(5)    | 24(4)    |
| C(9)  | 59(5)    | 38(4)    | 63(6)    | -16(4)   | 8(4)     | 8(4)     |
| C(10) | 49(4)    | 36(4)    | 42(5)    | -9(3)    | -6(4)    | 12(3)    |
| C(11) | 39(4)    | 40(4)    | 60(6)    | -14(4)   | -3(4)    | 6(3)     |
| C(12) | 61(5)    | 39(4)    | 86(7)    | -13(4)   | -12(5)   | 2(4)     |
| C(13) | 59(5)    | 48(4)    | 64(6)    | -10(4)   | 2(4)     | 4(4)     |
| C(14) | 33(3)    | 41(4)    | 47(5)    | 5(3)     | 9(3)     | 4(3)     |
| C(15) | 60(5)    | 56(5)    | 80(7)    | 14(4)    | 24(5)    | 0(4)     |
| C(16) | 46(4)    | 63(5)    | 68(6)    | 1(4)     | 0(4)     | -4(4)    |
| C(17) | 42(4)    | 43(4)    | 31(4)    | -2(3)    | 9(3)     | -8(3)    |
| C(18) | 45(4)    | 38(4)    | 55(6)    | -18(4)   | 17(4)    | -2(3)    |
| C(19) | 30(3)    | 34(3)    | 59(6)    | -6(4)    | 11(4)    | 1(3)     |
| C(20) | 30(3)    | 28(3)    | 45(5)    | -1(3)    | 13(3)    | -4(3)    |
| C(21) | 25(3)    | 31(3)    | 36(4)    | -3(3)    | 3(3)     | -8(3)    |
| C(22) | 26(3)    | 30(3)    | 53(5)    | 1(3)     | 2(3)     | 2(3)     |
| C(23) | 24(3)    | 29(3)    | 54(5)    | 2(3)     | 5(3)     | 3(3)     |
| C(24) | 29(3)    | 26(3)    | 39(5)    | 3(3)     | 1(3)     | 8(3)     |
| C(25) | 30(3)    | 25(3)    | 48(5)    | 5(3)     | 7(3)     | 10(3)    |
| C(26) | 29(3)    | 33(3)    | 57(5)    | 3(3)     | 1(4)     | 2(3)     |
| C(27) | 36(4)    | 40(4)    | 41(5)    | -1(3)    | 4(3)     | 7(3)     |
| C(28) | 32(3)    | 33(3)    | 50(5)    | -3(3)    | 0(3)     | -2(3)    |
| C(29) | 28(3)    | 28(3)    | 43(5)    | 2(3)     | -2(3)    | -1(3)    |
| C(30) | 34(3)    | 50(4)    | 40(5)    | 1(3)     | -5(3)    | -11(3)   |

Electronic Supplementary Information for Dalton Transactions  
This journal is © The Royal Society of Chemistry 2005

|        |        |       |         |        |        |        |
|--------|--------|-------|---------|--------|--------|--------|
| C(31)  | 46(4)  | 47(4) | 55(5)   | 2(4)   | -1(4)  | -18(3) |
| C(32)  | 36(4)  | 65(5) | 55(5)   | 1(4)   | 8(4)   | -5(4)  |
| C(33)  | 33(3)  | 26(3) | 40(4)   | 4(3)   | 11(3)  | 0(3)   |
| C(34)  | 41(4)  | 36(3) | 41(5)   | 0(3)   | 8(3)   | -1(3)  |
| C(35)  | 30(3)  | 34(3) | 64(5)   | 5(3)   | 3(3)   | -2(3)  |
| C(36A) | 53(7)  | 35(9) | 52(9)   | 7(6)   | -10(6) | 5(6)   |
| C(37A) | 100(7) | 54(5) | 142(10) | -19(6) | 40(7)  | -33(5) |
| C(38A) | 63(5)  | 54(5) | 93(8)   | 17(5)  | 17(5)  | -6(4)  |
| C(39A) | 43(6)  | 51(7) | 90(12)  | -13(6) | -8(7)  | 5(5)   |
| C(36B) | 53(7)  | 35(9) | 52(9)   | 7(6)   | -10(6) | 5(6)   |
| C(37B) | 100(7) | 54(5) | 142(10) | -19(6) | 40(7)  | -33(5) |
| C(38B) | 63(5)  | 54(5) | 93(8)   | 17(5)  | 17(5)  | -6(4)  |
| C(39B) | 43(6)  | 51(7) | 90(12)  | -13(6) | -8(7)  | 5(5)   |
| Cl(1)  | 29(1)  | 52(1) | 77(2)   | 24(1)  | -2(1)  | -8(1)  |
| Cl(2)  | 47(1)  | 29(1) | 69(1)   | -6(1)  | -15(1) | -4(1)  |
| Cl(3)  | 124(2) | 70(1) | 53(2)   | 11(1)  | 36(1)  | 40(1)  |
| N(1)   | 29(3)  | 29(3) | 33(4)   | -3(2)  | 8(3)   | -1(2)  |
| N(2)   | 32(3)  | 27(2) | 35(4)   | -5(2)  | 6(3)   | -5(2)  |
| N(3)   | 28(3)  | 27(2) | 37(4)   | -6(3)  | 3(2)   | -2(2)  |
| N(4)   | 25(3)  | 26(3) | 47(4)   | 0(3)   | 9(3)   | -2(2)  |
| N(5)   | 24(3)  | 27(3) | 41(4)   | -1(2)  | 5(3)   | 1(2)   |
| Nb(1)  | 30(1)  | 32(1) | 37(1)   | -1(1)  | 5(1)   | 8(1)   |
| O(1A)  | 52(4)  | 39(4) | 108(7)  | -1(4)  | 11(5)  | -2(3)  |
| O(1B)  | 52(4)  | 39(4) | 108(7)  | -1(4)  | 11(5)  | -2(3)  |

---

Electronic Supplementary Information for Dalton Transactions  
This journal is © The Royal Society of Chemistry 2005

### Structural Data for 5

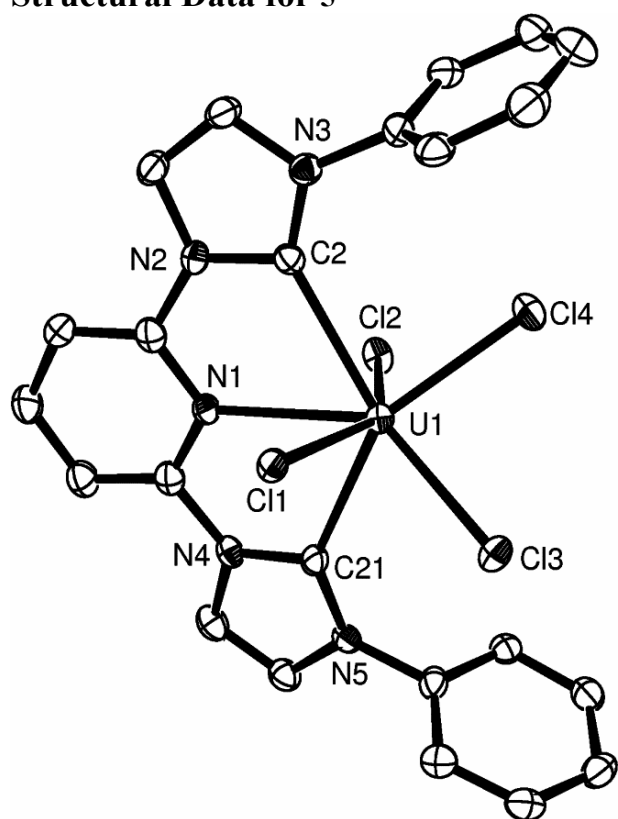

Electronic Supplementary Information for Dalton Transactions  
This journal is © The Royal Society of Chemistry 2005

Table 1. Crystal data and structure refinement for **5**.

|                                   |                                                                    |                  |
|-----------------------------------|--------------------------------------------------------------------|------------------|
| Identification code               | <b>5</b>                                                           |                  |
| Empirical formula                 | C <sub>39</sub> H <sub>49</sub> Cl <sub>4</sub> N <sub>5</sub> O U |                  |
| Formula weight                    | 983.66                                                             |                  |
| Temperature                       | 120(2) K                                                           |                  |
| Wavelength                        | 0.71073 Å                                                          |                  |
| Crystal system                    | Monoclinic                                                         |                  |
| Space group                       | P 2 <sub>1</sub> /c                                                |                  |
| Unit cell dimensions              | a = 10.7146(8) Å                                                   | α = 90°.         |
|                                   | b = 18.384(2) Å                                                    | β = 93.628(10)°. |
|                                   | c = 20.229(4) Å                                                    | γ = 90°.         |
| Volume                            | 3976.7(9) Å <sup>3</sup>                                           |                  |
| Z                                 | 4                                                                  |                  |
| Density (calculated)              | 1.643 Mg/m <sup>3</sup>                                            |                  |
| Absorption coefficient            | 4.388 mm <sup>-1</sup>                                             |                  |
| F(000)                            | 1944                                                               |                  |
| Crystal size                      | 0.20 x 0.20 x 0.20 mm <sup>3</sup>                                 |                  |
| Theta range for data collection   | 3.05 to 26.15°.                                                    |                  |
| Index ranges                      | -11 ≤ h ≤ 13, -22 ≤ k ≤ 22, -25 ≤ l ≤ 25                           |                  |
| Reflections collected             | 37286                                                              |                  |
| Independent reflections           | 7713 [R(int) = 0.0447]                                             |                  |
| Completeness to theta = 26.15°    | 97.1 %                                                             |                  |
| Absorption correction             | Semi-empirical from equivalents                                    |                  |
| Max. and min. transmission        | 0.4171 and 0.2835                                                  |                  |
| Refinement method                 | Full-matrix least-squares on F <sup>2</sup>                        |                  |
| Data / restraints / parameters    | 7713 / 0 / 459                                                     |                  |
| Goodness-of-fit on F <sup>2</sup> | 1.021                                                              |                  |
| Final R indices [I > 2σ(I)]       | R <sub>1</sub> = 0.0370, wR <sub>2</sub> = 0.0715                  |                  |
| R indices (all data)              | R <sub>1</sub> = 0.0561, wR <sub>2</sub> = 0.0771                  |                  |
| Largest diff. peak and hole       | 1.052 and -1.111 e. Å <sup>-3</sup>                                |                  |

Table 2. Atomic coordinates ( $\times 10^4$ ) and equivalent isotropic displacement parameters ( $\approx^2 \times 10^3$ ) for **5**.  $U(\text{eq})$  is defined as one third of the trace of the orthogonalized  $U^{ij}$  tensor.

|       | x        | y       | z       | U(eq) |
|-------|----------|---------|---------|-------|
| C(1)  | 9415(5)  | 1763(3) | 5447(2) | 21(1) |
| C(2)  | 7811(5)  | 2512(3) | 4862(2) | 18(1) |
| C(3)  | 6981(5)  | 3004(3) | 5754(2) | 24(1) |
| C(4)  | 7920(5)  | 2584(3) | 5995(3) | 24(1) |
| C(5)  | 5980(5)  | 3331(3) | 4656(2) | 23(1) |
| C(6)  | 6284(5)  | 3999(3) | 4380(3) | 26(1) |
| C(7)  | 5320(6)  | 4347(3) | 3999(3) | 36(2) |
| C(8)  | 4152(6)  | 4044(3) | 3909(3) | 38(2) |
| C(9)  | 3893(5)  | 3383(3) | 4187(3) | 34(1) |
| C(10) | 4802(5)  | 3009(3) | 4575(3) | 26(1) |
| C(11) | 4503(5)  | 2276(3) | 4869(3) | 30(1) |
| C(12) | 3978(6)  | 1738(3) | 4339(3) | 40(2) |
| C(13) | 3574(6)  | 2377(4) | 5405(3) | 45(2) |
| C(14) | 7570(5)  | 4338(3) | 4457(3) | 31(1) |
| C(15) | 7558(6)  | 5027(3) | 4877(3) | 42(2) |
| C(16) | 8080(6)  | 4489(3) | 3778(3) | 42(2) |
| C(17) | 9996(5)  | 1516(3) | 6032(3) | 24(1) |
| C(18) | 10893(5) | 987(3)  | 5988(3) | 28(1) |
| C(19) | 11202(5) | 729(3)  | 5375(3) | 26(1) |
| C(20) | 10591(5) | 1031(3) | 4825(2) | 20(1) |
| C(21) | 10386(5) | 1172(3) | 3619(2) | 20(1) |
| C(22) | 11633(5) | 234(3)  | 3354(3) | 24(1) |
| C(23) | 11633(5) | 236(3)  | 4015(3) | 24(1) |
| C(24) | 10740(5) | 985(3)  | 2415(2) | 22(1) |
| C(25) | 9683(5)  | 732(3)  | 2049(2) | 21(1) |
| C(26) | 9597(5)  | 907(3)  | 1376(3) | 26(1) |
| C(27) | 10494(5) | 1312(3) | 1092(3) | 28(1) |
| C(28) | 11524(5) | 1558(3) | 1474(3) | 28(1) |
| C(29) | 11679(5) | 1396(3) | 2146(3) | 24(1) |
| C(30) | 12834(5) | 1662(3) | 2548(3) | 29(1) |

Electronic Supplementary Information for Dalton Transactions  
This journal is © The Royal Society of Chemistry 2005

|       |          |         |         |       |
|-------|----------|---------|---------|-------|
| C(31) | 12949(6) | 2488(3) | 2528(3) | 42(2) |
| C(32) | 14021(5) | 1308(4) | 2311(3) | 43(2) |
| C(33) | 8677(5)  | 281(3)  | 2344(3) | 25(1) |
| C(34) | 8820(6)  | -517(3) | 2165(3) | 32(1) |
| C(35) | 7366(5)  | 567(3)  | 2139(3) | 32(1) |
| C(36) | 6262(6)  | 3646(3) | 1808(3) | 39(2) |
| C(37) | 5349(6)  | 4090(3) | 2161(3) | 41(2) |
| C(38) | 4471(7)  | 4325(5) | 1593(4) | 61(2) |
| C(39) | 5337(6)  | 4414(4) | 1024(3) | 49(2) |
| Cl(1) | 10359(1) | 3077(1) | 4251(1) | 19(1) |
| Cl(2) | 7449(1)  | 902(1)  | 3953(1) | 21(1) |
| Cl(3) | 9425(1)  | 2607(1) | 2613(1) | 26(1) |
| Cl(4) | 6520(1)  | 2563(1) | 3226(1) | 28(1) |
| N(1)  | 9707(4)  | 1538(2) | 4844(2) | 17(1) |
| N(2)  | 8429(4)  | 2278(2) | 5439(2) | 18(1) |
| N(3)  | 6930(4)  | 2959(2) | 5071(2) | 20(1) |
| N(4)  | 10856(4) | 812(2)  | 4174(2) | 18(1) |
| N(5)  | 10885(4) | 806(2)  | 3117(2) | 19(1) |
| O(1)  | 6426(4)  | 3992(2) | 1192(2) | 42(1) |
| U(1)  | 8671(1)  | 2142(1) | 3751(1) | 18(1) |

---



Table 3. Bond lengths [ $\approx$ ] and angles [ $\infty$ ] for **5**.

---

|              |          |
|--------------|----------|
| C(1)-N(1)    | 1.344(6) |
| C(1)-C(17)   | 1.380(7) |
| C(1)-N(2)    | 1.417(6) |
| C(2)-N(3)    | 1.340(6) |
| C(2)-N(2)    | 1.375(6) |
| C(2)-U(1)    | 2.573(5) |
| C(3)-C(4)    | 1.336(7) |
| C(3)-N(3)    | 1.382(6) |
| C(3)-H(3)    | 0.9500   |
| C(4)-N(2)    | 1.398(6) |
| C(4)-H(4)    | 0.9500   |
| C(5)-C(10)   | 1.395(7) |
| C(5)-C(6)    | 1.396(7) |
| C(5)-N(3)    | 1.448(6) |
| C(6)-C(7)    | 1.403(8) |
| C(6)-C(14)   | 1.512(8) |
| C(7)-C(8)    | 1.371(9) |
| C(7)-H(7)    | 0.9500   |
| C(8)-C(9)    | 1.375(9) |
| C(8)-H(8)    | 0.9500   |
| C(9)-C(10)   | 1.394(8) |
| C(9)-H(9)    | 0.9500   |
| C(10)-C(11)  | 1.514(8) |
| C(11)-C(13)  | 1.529(8) |
| C(11)-C(12)  | 1.539(8) |
| C(11)-H(11)  | 1.0000   |
| C(12)-H(12A) | 0.9800   |
| C(12)-H(12B) | 0.9800   |
| C(12)-H(12C) | 0.9800   |
| C(13)-H(13A) | 0.9800   |
| C(13)-H(13B) | 0.9800   |
| C(13)-H(13C) | 0.9800   |
| C(14)-C(15)  | 1.527(8) |

Electronic Supplementary Information for Dalton Transactions  
This journal is © The Royal Society of Chemistry 2005

|              |          |
|--------------|----------|
| C(14)-C(16)  | 1.536(8) |
| C(14)-H(14)  | 1.0000   |
| C(15)-H(15A) | 0.9800   |
| C(15)-H(15B) | 0.9800   |
| C(15)-H(15C) | 0.9800   |
| C(16)-H(16A) | 0.9800   |
| C(16)-H(16B) | 0.9800   |
| C(16)-H(16C) | 0.9800   |
| C(17)-C(18)  | 1.374(7) |
| C(17)-H(17)  | 0.9500   |
| C(18)-C(19)  | 1.388(7) |
| C(18)-H(18)  | 0.9500   |
| C(19)-C(20)  | 1.372(7) |
| C(19)-H(19)  | 0.9500   |
| C(20)-N(1)   | 1.331(6) |
| C(20)-N(4)   | 1.422(6) |
| C(21)-N(5)   | 1.356(6) |
| C(21)-N(4)   | 1.371(6) |
| C(21)-U(1)   | 2.587(5) |
| C(22)-C(23)  | 1.336(7) |
| C(22)-N(5)   | 1.390(6) |
| C(22)-H(22)  | 0.9500   |
| C(23)-N(4)   | 1.397(6) |
| C(23)-H(23)  | 0.9500   |
| C(24)-C(25)  | 1.395(7) |
| C(24)-C(29)  | 1.397(7) |
| C(24)-N(5)   | 1.455(6) |
| C(25)-C(26)  | 1.396(7) |
| C(25)-C(33)  | 1.512(7) |
| C(26)-C(27)  | 1.371(7) |
| C(26)-H(26)  | 0.9500   |
| C(27)-C(28)  | 1.382(8) |
| C(27)-H(27)  | 0.9500   |
| C(28)-C(29)  | 1.391(7) |
| C(28)-H(28)  | 0.9500   |

Electronic Supplementary Information for Dalton Transactions  
This journal is © The Royal Society of Chemistry 2005

|              |            |
|--------------|------------|
| C(29)-C(30)  | 1.517(7)   |
| C(30)-C(31)  | 1.524(8)   |
| C(30)-C(32)  | 1.532(8)   |
| C(30)-H(30)  | 1.0000     |
| C(31)-H(31A) | 0.9800     |
| C(31)-H(31B) | 0.9800     |
| C(31)-H(31C) | 0.9800     |
| C(32)-H(32A) | 0.9800     |
| C(32)-H(32B) | 0.9800     |
| C(32)-H(32C) | 0.9800     |
| C(33)-C(34)  | 1.521(7)   |
| C(33)-C(35)  | 1.533(7)   |
| C(33)-H(33)  | 1.0000     |
| C(34)-H(34A) | 0.9800     |
| C(34)-H(34B) | 0.9800     |
| C(34)-H(34C) | 0.9800     |
| C(35)-H(35A) | 0.9800     |
| C(35)-H(35B) | 0.9800     |
| C(35)-H(35C) | 0.9800     |
| C(36)-O(1)   | 1.420(7)   |
| C(36)-C(37)  | 1.492(8)   |
| C(36)-H(36A) | 0.9900     |
| C(36)-H(36B) | 0.9900     |
| C(37)-C(38)  | 1.501(9)   |
| C(37)-H(37A) | 0.9900     |
| C(37)-H(37B) | 0.9900     |
| C(38)-C(39)  | 1.533(10)  |
| C(38)-H(38A) | 0.9900     |
| C(38)-H(38B) | 0.9900     |
| C(39)-O(1)   | 1.424(8)   |
| C(39)-H(39A) | 0.9900     |
| C(39)-H(39B) | 0.9900     |
| Cl(1)-U(1)   | 2.6486(12) |
| Cl(2)-U(1)   | 2.6725(12) |
| Cl(3)-U(1)   | 2.6314(13) |

Electronic Supplementary Information for Dalton Transactions  
This journal is © The Royal Society of Chemistry 2005

|                   |            |
|-------------------|------------|
| Cl(4)-U(1)        | 2.5936(13) |
| N(1)-U(1)         | 2.653(4)   |
|                   |            |
| N(1)-C(1)-C(17)   | 124.0(5)   |
| N(1)-C(1)-N(2)    | 114.4(4)   |
| C(17)-C(1)-N(2)   | 121.7(5)   |
| N(3)-C(2)-N(2)    | 103.6(4)   |
| N(3)-C(2)-U(1)    | 137.4(3)   |
| N(2)-C(2)-U(1)    | 118.6(3)   |
| C(4)-C(3)-N(3)    | 108.1(4)   |
| C(4)-C(3)-H(3)    | 126.0      |
| N(3)-C(3)-H(3)    | 126.0      |
| C(3)-C(4)-N(2)    | 105.2(4)   |
| C(3)-C(4)-H(4)    | 127.4      |
| N(2)-C(4)-H(4)    | 127.4      |
| C(10)-C(5)-C(6)   | 124.0(5)   |
| C(10)-C(5)-N(3)   | 117.7(5)   |
| C(6)-C(5)-N(3)    | 118.3(5)   |
| C(5)-C(6)-C(7)    | 116.0(5)   |
| C(5)-C(6)-C(14)   | 123.7(5)   |
| C(7)-C(6)-C(14)   | 120.2(5)   |
| C(8)-C(7)-C(6)    | 121.5(6)   |
| C(8)-C(7)-H(7)    | 119.2      |
| C(6)-C(7)-H(7)    | 119.2      |
| C(7)-C(8)-C(9)    | 120.7(6)   |
| C(7)-C(8)-H(8)    | 119.7      |
| C(9)-C(8)-H(8)    | 119.7      |
| C(8)-C(9)-C(10)   | 121.0(6)   |
| C(8)-C(9)-H(9)    | 119.5      |
| C(10)-C(9)-H(9)   | 119.5      |
| C(9)-C(10)-C(5)   | 116.9(5)   |
| C(9)-C(10)-C(11)  | 120.2(5)   |
| C(5)-C(10)-C(11)  | 122.9(5)   |
| C(10)-C(11)-C(13) | 109.5(5)   |
| C(10)-C(11)-C(12) | 112.0(5)   |

Electronic Supplementary Information for Dalton Transactions  
This journal is © The Royal Society of Chemistry 2005

|                     |          |
|---------------------|----------|
| C(13)-C(11)-C(12)   | 110.3(5) |
| C(10)-C(11)-H(11)   | 108.3    |
| C(13)-C(11)-H(11)   | 108.3    |
| C(12)-C(11)-H(11)   | 108.3    |
| C(11)-C(12)-H(12A)  | 109.5    |
| C(11)-C(12)-H(12B)  | 109.5    |
| H(12A)-C(12)-H(12B) | 109.5    |
| C(11)-C(12)-H(12C)  | 109.5    |
| H(12A)-C(12)-H(12C) | 109.5    |
| H(12B)-C(12)-H(12C) | 109.5    |
| C(11)-C(13)-H(13A)  | 109.5    |
| C(11)-C(13)-H(13B)  | 109.5    |
| H(13A)-C(13)-H(13B) | 109.5    |
| C(11)-C(13)-H(13C)  | 109.5    |
| H(13A)-C(13)-H(13C) | 109.5    |
| H(13B)-C(13)-H(13C) | 109.5    |
| C(6)-C(14)-C(15)    | 111.0(5) |
| C(6)-C(14)-C(16)    | 110.9(5) |
| C(15)-C(14)-C(16)   | 111.3(5) |
| C(6)-C(14)-H(14)    | 107.8    |
| C(15)-C(14)-H(14)   | 107.8    |
| C(16)-C(14)-H(14)   | 107.8    |
| C(14)-C(15)-H(15A)  | 109.5    |
| C(14)-C(15)-H(15B)  | 109.5    |
| H(15A)-C(15)-H(15B) | 109.5    |
| C(14)-C(15)-H(15C)  | 109.5    |
| H(15A)-C(15)-H(15C) | 109.5    |
| H(15B)-C(15)-H(15C) | 109.5    |
| C(14)-C(16)-H(16A)  | 109.5    |
| C(14)-C(16)-H(16B)  | 109.5    |
| H(16A)-C(16)-H(16B) | 109.5    |
| C(14)-C(16)-H(16C)  | 109.5    |
| H(16A)-C(16)-H(16C) | 109.5    |
| H(16B)-C(16)-H(16C) | 109.5    |
| C(18)-C(17)-C(1)    | 117.2(5) |

Electronic Supplementary Information for Dalton Transactions  
This journal is © The Royal Society of Chemistry 2005

|                   |          |
|-------------------|----------|
| C(18)-C(17)-H(17) | 121.4    |
| C(1)-C(17)-H(17)  | 121.4    |
| C(17)-C(18)-C(19) | 120.5(5) |
| C(17)-C(18)-H(18) | 119.8    |
| C(19)-C(18)-H(18) | 119.8    |
| C(20)-C(19)-C(18) | 117.3(5) |
| C(20)-C(19)-H(19) | 121.4    |
| C(18)-C(19)-H(19) | 121.4    |
| N(1)-C(20)-C(19)  | 124.3(5) |
| N(1)-C(20)-N(4)   | 114.1(4) |
| C(19)-C(20)-N(4)  | 121.6(5) |
| N(5)-C(21)-N(4)   | 103.5(4) |
| N(5)-C(21)-U(1)   | 137.4(3) |
| N(4)-C(21)-U(1)   | 118.3(3) |
| C(23)-C(22)-N(5)  | 107.8(5) |
| C(23)-C(22)-H(22) | 126.1    |
| N(5)-C(22)-H(22)  | 126.1    |
| C(22)-C(23)-N(4)  | 105.7(5) |
| C(22)-C(23)-H(23) | 127.1    |
| N(4)-C(23)-H(23)  | 127.1    |
| C(25)-C(24)-C(29) | 123.6(5) |
| C(25)-C(24)-N(5)  | 118.4(4) |
| C(29)-C(24)-N(5)  | 117.9(4) |
| C(24)-C(25)-C(26) | 116.3(5) |
| C(24)-C(25)-C(33) | 123.2(5) |
| C(26)-C(25)-C(33) | 120.4(5) |
| C(27)-C(26)-C(25) | 122.0(5) |
| C(27)-C(26)-H(26) | 119.0    |
| C(25)-C(26)-H(26) | 119.0    |
| C(26)-C(27)-C(28) | 119.9(5) |
| C(26)-C(27)-H(27) | 120.0    |
| C(28)-C(27)-H(27) | 120.0    |
| C(27)-C(28)-C(29) | 121.2(5) |
| C(27)-C(28)-H(28) | 119.4    |
| C(29)-C(28)-H(28) | 119.4    |

Electronic Supplementary Information for Dalton Transactions  
This journal is © The Royal Society of Chemistry 2005

|                     |          |
|---------------------|----------|
| C(28)-C(29)-C(24)   | 116.9(5) |
| C(28)-C(29)-C(30)   | 119.9(5) |
| C(24)-C(29)-C(30)   | 123.2(5) |
| C(29)-C(30)-C(31)   | 111.8(5) |
| C(29)-C(30)-C(32)   | 111.1(5) |
| C(31)-C(30)-C(32)   | 110.1(5) |
| C(29)-C(30)-H(30)   | 107.9    |
| C(31)-C(30)-H(30)   | 107.9    |
| C(32)-C(30)-H(30)   | 107.9    |
| C(30)-C(31)-H(31A)  | 109.5    |
| C(30)-C(31)-H(31B)  | 109.5    |
| H(31A)-C(31)-H(31B) | 109.5    |
| C(30)-C(31)-H(31C)  | 109.5    |
| H(31A)-C(31)-H(31C) | 109.5    |
| H(31B)-C(31)-H(31C) | 109.5    |
| C(30)-C(32)-H(32A)  | 109.5    |
| C(30)-C(32)-H(32B)  | 109.5    |
| H(32A)-C(32)-H(32B) | 109.5    |
| C(30)-C(32)-H(32C)  | 109.5    |
| H(32A)-C(32)-H(32C) | 109.5    |
| H(32B)-C(32)-H(32C) | 109.5    |
| C(25)-C(33)-C(34)   | 110.5(4) |
| C(25)-C(33)-C(35)   | 111.7(4) |
| C(34)-C(33)-C(35)   | 111.8(5) |
| C(25)-C(33)-H(33)   | 107.6    |
| C(34)-C(33)-H(33)   | 107.6    |
| C(35)-C(33)-H(33)   | 107.6    |
| C(33)-C(34)-H(34A)  | 109.5    |
| C(33)-C(34)-H(34B)  | 109.5    |
| H(34A)-C(34)-H(34B) | 109.5    |
| C(33)-C(34)-H(34C)  | 109.5    |
| H(34A)-C(34)-H(34C) | 109.5    |
| H(34B)-C(34)-H(34C) | 109.5    |
| C(33)-C(35)-H(35A)  | 109.5    |
| C(33)-C(35)-H(35B)  | 109.5    |

Electronic Supplementary Information for Dalton Transactions  
This journal is © The Royal Society of Chemistry 2005

|                     |          |
|---------------------|----------|
| H(35A)-C(35)-H(35B) | 109.5    |
| C(33)-C(35)-H(35C)  | 109.5    |
| H(35A)-C(35)-H(35C) | 109.5    |
| H(35B)-C(35)-H(35C) | 109.5    |
| O(1)-C(36)-C(37)    | 107.3(5) |
| O(1)-C(36)-H(36A)   | 110.3    |
| C(37)-C(36)-H(36A)  | 110.3    |
| O(1)-C(36)-H(36B)   | 110.3    |
| C(37)-C(36)-H(36B)  | 110.3    |
| H(36A)-C(36)-H(36B) | 108.5    |
| C(36)-C(37)-C(38)   | 100.9(5) |
| C(36)-C(37)-H(37A)  | 111.6    |
| C(38)-C(37)-H(37A)  | 111.6    |
| C(36)-C(37)-H(37B)  | 111.6    |
| C(38)-C(37)-H(37B)  | 111.6    |
| H(37A)-C(37)-H(37B) | 109.4    |
| C(37)-C(38)-C(39)   | 103.1(6) |
| C(37)-C(38)-H(38A)  | 111.1    |
| C(39)-C(38)-H(38A)  | 111.1    |
| C(37)-C(38)-H(38B)  | 111.1    |
| C(39)-C(38)-H(38B)  | 111.1    |
| H(38A)-C(38)-H(38B) | 109.1    |
| O(1)-C(39)-C(38)    | 106.8(5) |
| O(1)-C(39)-H(39A)   | 110.4    |
| C(38)-C(39)-H(39A)  | 110.4    |
| O(1)-C(39)-H(39B)   | 110.4    |
| C(38)-C(39)-H(39B)  | 110.4    |
| H(39A)-C(39)-H(39B) | 108.6    |
| C(20)-N(1)-C(1)     | 116.7(4) |
| C(20)-N(1)-U(1)     | 122.0(3) |
| C(1)-N(1)-U(1)      | 121.2(3) |
| C(2)-N(2)-C(4)      | 111.5(4) |
| C(2)-N(2)-C(1)      | 122.5(4) |
| C(4)-N(2)-C(1)      | 126.0(4) |
| C(2)-N(3)-C(3)      | 111.6(4) |



Electronic Supplementary Information for Dalton Transactions  
This journal is © The Royal Society of Chemistry 2005

|                  |            |
|------------------|------------|
| C(2)-N(3)-C(5)   | 126.1(4)   |
| C(3)-N(3)-C(5)   | 122.2(4)   |
| C(21)-N(4)-C(23) | 111.7(4)   |
| C(21)-N(4)-C(20) | 122.5(4)   |
| C(23)-N(4)-C(20) | 125.8(4)   |
| C(21)-N(5)-C(22) | 111.2(4)   |
| C(21)-N(5)-C(24) | 126.5(4)   |
| C(22)-N(5)-C(24) | 122.2(4)   |
| C(36)-O(1)-C(39) | 108.0(5)   |
| C(2)-U(1)-C(21)  | 124.68(15) |
| C(2)-U(1)-Cl(4)  | 85.44(11)  |
| C(21)-U(1)-Cl(4) | 141.43(11) |
| C(2)-U(1)-Cl(3)  | 145.58(11) |
| C(21)-U(1)-Cl(3) | 82.76(11)  |
| Cl(4)-U(1)-Cl(3) | 81.86(4)   |
| C(2)-U(1)-Cl(1)  | 76.65(11)  |
| C(21)-U(1)-Cl(1) | 90.81(11)  |
| Cl(4)-U(1)-Cl(1) | 122.03(4)  |
| Cl(3)-U(1)-Cl(1) | 83.28(4)   |
| C(2)-U(1)-N(1)   | 62.47(14)  |
| C(21)-U(1)-N(1)  | 62.30(14)  |
| Cl(4)-U(1)-N(1)  | 141.27(9)  |
| Cl(3)-U(1)-N(1)  | 136.87(9)  |
| Cl(1)-U(1)-N(1)  | 73.40(9)   |
| C(2)-U(1)-Cl(2)  | 83.50(11)  |
| C(21)-U(1)-Cl(2) | 77.64(11)  |
| Cl(4)-U(1)-Cl(2) | 83.44(4)   |
| Cl(3)-U(1)-Cl(2) | 126.22(4)  |
| Cl(1)-U(1)-Cl(2) | 145.55(4)  |
| N(1)-U(1)-Cl(2)  | 72.50(9)   |

---

Symmetry transformations used to generate equivalent atoms:

Table 4. Anisotropic displacement parameters ( $\times 10^3$ ) for **5**. The anisotropic displacement factor exponent takes the form:  $-2\pi^2 [ h^2 a^* U^{11} + \dots + 2 h k a^* b^* U^{12} ]$

|       | U <sup>11</sup> | U <sup>22</sup> | U <sup>33</sup> | U <sup>23</sup> | U <sup>13</sup> | U <sup>12</sup> |
|-------|-----------------|-----------------|-----------------|-----------------|-----------------|-----------------|
| C(1)  | 18(3)           | 21(3)           | 23(3)           | 4(2)            | -1(2)           | -6(2)           |
| C(2)  | 16(3)           | 18(3)           | 20(3)           | 4(2)            | 2(2)            | -1(2)           |
| C(3)  | 24(3)           | 28(3)           | 20(3)           | -3(2)           | 6(2)            | 0(2)            |
| C(4)  | 25(3)           | 31(3)           | 16(3)           | -1(2)           | 3(2)            | -2(2)           |
| C(5)  | 24(3)           | 26(3)           | 19(3)           | -1(2)           | 0(2)            | 7(2)            |
| C(6)  | 30(3)           | 24(3)           | 25(3)           | -2(2)           | 7(2)            | 7(2)            |
| C(7)  | 47(4)           | 32(3)           | 30(3)           | 3(3)            | 7(3)            | 11(3)           |
| C(8)  | 30(4)           | 42(4)           | 41(4)           | 1(3)            | 2(3)            | 19(3)           |
| C(9)  | 20(3)           | 53(4)           | 29(3)           | -8(3)           | -1(2)           | 4(3)            |
| C(10) | 20(3)           | 35(3)           | 23(3)           | -3(2)           | 5(2)            | 1(2)            |
| C(11) | 20(3)           | 41(4)           | 28(3)           | -2(3)           | 3(2)            | -4(3)           |
| C(12) | 35(4)           | 42(4)           | 43(4)           | -7(3)           | 2(3)            | -9(3)           |
| C(13) | 38(4)           | 64(5)           | 33(4)           | 2(3)            | 13(3)           | -3(3)           |
| C(14) | 33(3)           | 20(3)           | 40(3)           | 4(2)            | 7(3)            | -1(3)           |
| C(15) | 51(4)           | 33(4)           | 42(4)           | 0(3)            | 9(3)            | -3(3)           |
| C(16) | 45(4)           | 35(4)           | 46(4)           | 1(3)            | 17(3)           | -5(3)           |
| C(17) | 25(3)           | 29(3)           | 18(3)           | 0(2)            | 2(2)            | 2(2)            |
| C(18) | 27(3)           | 33(3)           | 24(3)           | 8(2)            | -3(2)           | 4(3)            |
| C(19) | 24(3)           | 26(3)           | 27(3)           | 5(2)            | -1(2)           | 1(2)            |
| C(20) | 19(3)           | 20(3)           | 22(3)           | 3(2)            | -1(2)           | -5(2)           |
| C(21) | 17(3)           | 26(3)           | 16(3)           | -1(2)           | 0(2)            | -4(2)           |
| C(22) | 21(3)           | 23(3)           | 27(3)           | -3(2)           | 1(2)            | 4(2)            |
| C(23) | 22(3)           | 20(3)           | 30(3)           | 1(2)            | -2(2)           | 4(2)            |
| C(24) | 24(3)           | 24(3)           | 17(3)           | -3(2)           | -1(2)           | 6(2)            |
| C(25) | 22(3)           | 19(3)           | 21(3)           | -5(2)           | 3(2)            | 4(2)            |
| C(26) | 22(3)           | 28(3)           | 27(3)           | -5(2)           | -1(2)           | 2(2)            |
| C(27) | 34(3)           | 31(3)           | 21(3)           | 1(2)            | 7(2)            | 4(3)            |
| C(28) | 23(3)           | 27(3)           | 33(3)           | 2(2)            | 8(2)            | 1(2)            |
| C(29) | 23(3)           | 22(3)           | 27(3)           | -2(2)           | 4(2)            | -2(2)           |
| C(30) | 28(3)           | 30(3)           | 30(3)           | -2(3)           | 4(3)            | -5(3)           |

Electronic Supplementary Information for Dalton Transactions  
This journal is © The Royal Society of Chemistry 2005

|       |       |       |       |       |       |       |
|-------|-------|-------|-------|-------|-------|-------|
| C(31) | 31(4) | 33(4) | 60(4) | -6(3) | -4(3) | -1(3) |
| C(32) | 28(3) | 42(4) | 59(4) | -8(3) | -4(3) | 4(3)  |
| C(33) | 23(3) | 27(3) | 25(3) | 1(2)  | 1(2)  | -3(2) |
| C(34) | 36(4) | 27(3) | 34(3) | -2(3) | 3(3)  | -1(3) |
| C(35) | 21(3) | 39(4) | 34(3) | -3(3) | 3(3)  | -3(3) |
| C(36) | 36(4) | 36(4) | 46(4) | 5(3)  | 7(3)  | 4(3)  |
| C(37) | 46(4) | 37(4) | 40(4) | -1(3) | 7(3)  | 2(3)  |
| C(38) | 56(5) | 68(5) | 58(5) | -1(4) | -1(4) | 25(4) |
| C(39) | 44(4) | 53(4) | 49(4) | 12(4) | -7(3) | -4(4) |
| Cl(1) | 18(1) | 23(1) | 17(1) | -1(1) | 1(1)  | -7(1) |
| Cl(2) | 21(1) | 13(1) | 27(1) | 1(1)  | -4(1) | -3(1) |
| Cl(3) | 29(1) | 32(1) | 18(1) | 4(1)  | 4(1)  | 2(1)  |
| Cl(4) | 19(1) | 35(1) | 30(1) | 3(1)  | -2(1) | 4(1)  |
| N(1)  | 18(2) | 17(2) | 17(2) | 2(2)  | 0(2)  | 3(2)  |
| N(2)  | 21(2) | 18(2) | 16(2) | 2(2)  | -1(2) | -1(2) |
| N(3)  | 21(2) | 19(2) | 20(2) | 1(2)  | 3(2)  | 1(2)  |
| N(4)  | 17(2) | 17(2) | 21(2) | 1(2)  | -2(2) | 2(2)  |
| N(5)  | 15(2) | 20(2) | 21(2) | -1(2) | 1(2)  | 2(2)  |
| O(1)  | 44(3) | 39(2) | 44(3) | 5(2)  | 9(2)  | -1(2) |
| U(1)  | 17(1) | 20(1) | 17(1) | 1(1)  | 1(1)  | 1(1)  |

---

### Structural Data for 6

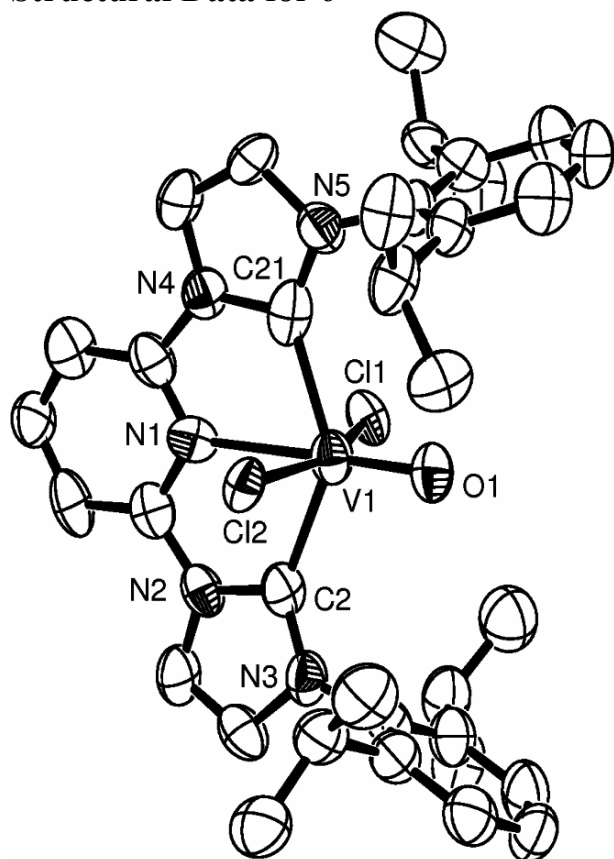

Table 1. Crystal data and structure refinement for **6**.

|                                   |                                                                    |                 |
|-----------------------------------|--------------------------------------------------------------------|-----------------|
| Identification code               | <b>6</b>                                                           |                 |
| Empirical formula                 | C <sub>35</sub> H <sub>41</sub> Cl <sub>2</sub> N <sub>5</sub> O V |                 |
| Formula weight                    | 669.57                                                             |                 |
| Temperature                       | 120(2) K                                                           |                 |
| Wavelength                        | 0.6868 Å                                                           |                 |
| Crystal system                    | Monoclinic                                                         |                 |
| Space group                       | P 2 <sub>1</sub> /n                                                |                 |
| Unit cell dimensions              | a = 16.699(5) Å                                                    | α = 90°.        |
|                                   | b = 19.125(5) Å                                                    | β = 97.012(4)°. |
|                                   | c = 22.226(6) Å                                                    | γ = 90°.        |
| Volume                            | 7045(3) Å <sup>3</sup>                                             |                 |
| Z                                 | 8                                                                  |                 |
| Density (calculated)              | 1.263 Mg/m <sup>3</sup>                                            |                 |
| Absorption coefficient            | 0.467 mm <sup>-1</sup>                                             |                 |
| F(000)                            | 2808                                                               |                 |
| Crystal size                      | 0.10 x 0.03 x 0.03 mm <sup>3</sup>                                 |                 |
| Theta range for data collection   | 2.06 to 20.08°.                                                    |                 |
| Index ranges                      | -16 ≤ h ≤ 16, -19 ≤ k ≤ 19, -22 ≤ l ≤ 22                           |                 |
| Reflections collected             | 34114                                                              |                 |
| Independent reflections           | 7369 [R(int) = 0.1383]                                             |                 |
| Completeness to theta = 20.08°    | 99.8 %                                                             |                 |
| Absorption correction             | Semi-empirical from equivalents                                    |                 |
| Max. and min. transmission        | 0.9861 and 0.621243                                                |                 |
| Refinement method                 | Full-matrix least-squares on F <sup>2</sup>                        |                 |
| Data / restraints / parameters    | 7369 / 0 / 809                                                     |                 |
| Goodness-of-fit on F <sup>2</sup> | 0.969                                                              |                 |
| Final R indices [I > 2σ(I)]       | R1 = 0.0763, wR2 = 0.1795                                          |                 |
| R indices (all data)              | R1 = 0.1342, wR2 = 0.2073                                          |                 |
| Largest diff. peak and hole       | 1.320 and -0.442 e. Å <sup>-3</sup>                                |                 |

Table 2. Atomic coordinates ( $\times 10^4$ ) and equivalent isotropic displacement parameters ( $\approx^2 \times 10^3$ ) for **6**.  $U(\text{eq})$  is defined as one third of the trace of the orthogonalized  $U^{ij}$  tensor.

|       | x       | y       | z       | U(eq) |
|-------|---------|---------|---------|-------|
| C(1)  | 5734(6) | 1586(5) | 2868(4) | 52(2) |
| C(2)  | 5008(5) | 2059(5) | 3654(4) | 50(2) |
| C(3)  | 4758(5) | 2650(5) | 4627(4) | 55(3) |
| C(4)  | 4651(5) | 2195(5) | 5106(4) | 57(3) |
| C(5)  | 4920(6) | 1429(5) | 5118(4) | 61(3) |
| C(6)  | 5662(6) | 1302(5) | 5566(5) | 76(3) |
| C(7)  | 4232(6) | 945(6)  | 5245(5) | 78(3) |
| C(8)  | 4316(6) | 2481(6) | 5594(5) | 70(3) |
| C(9)  | 4077(6) | 3165(6) | 5591(5) | 66(3) |
| C(10) | 4143(6) | 3589(6) | 5109(5) | 76(3) |
| C(11) | 4494(6) | 3328(6) | 4610(5) | 63(3) |
| C(12) | 4570(6) | 3815(6) | 4072(5) | 75(3) |
| C(13) | 4948(7) | 4524(5) | 4231(5) | 79(3) |
| C(14) | 3737(7) | 3893(6) | 3692(5) | 98(4) |
| C(15) | 6077(5) | 2566(5) | 4236(5) | 61(3) |
| C(16) | 6360(6) | 2293(5) | 3746(5) | 63(3) |
| C(17) | 6412(5) | 1470(6) | 2566(5) | 68(3) |
| C(18) | 6295(6) | 1036(6) | 2067(5) | 62(3) |
| C(19) | 5572(6) | 741(5)  | 1881(4) | 65(3) |
| C(20) | 4932(6) | 894(5)  | 2207(5) | 54(3) |
| C(21) | 3546(6) | 888(5)  | 2416(4) | 57(3) |
| C(22) | 3060(6) | 111(5)  | 1690(4) | 52(2) |
| C(23) | 3849(6) | 179(5)  | 1632(4) | 59(3) |
| C(24) | 2060(5) | 706(5)  | 2279(4) | 49(2) |
| C(25) | 1762(5) | 386(5)  | 2768(4) | 52(2) |
| C(26) | 2263(6) | -89(5)  | 3233(4) | 63(3) |
| C(27) | 1868(6) | -825(5) | 3244(5) | 77(3) |
| C(28) | 2344(6) | 233(5)  | 3862(4) | 65(3) |
| C(29) | 958(6)  | 505(5)  | 2842(5) | 70(3) |
| C(30) | 500(6)  | 926(5)  | 2440(5) | 67(3) |

Electronic Supplementary Information for Dalton Transactions  
This journal is © The Royal Society of Chemistry 2005

|       |          |         |         |       |
|-------|----------|---------|---------|-------|
| C(31) | 797(6)   | 1245(5) | 1967(5) | 69(3) |
| C(32) | 1604(6)  | 1124(5) | 1877(4) | 54(2) |
| C(33) | 1924(5)  | 1471(5) | 1329(4) | 56(3) |
| C(34) | 1576(7)  | 1134(6) | 739(5)  | 92(4) |
| C(35) | 1819(6)  | 2248(5) | 1331(5) | 81(3) |
| C(36) | 10199(6) | 3638(5) | 2567(4) | 53(2) |
| C(37) | 8802(6)  | 3677(5) | 2646(4) | 52(2) |
| C(38) | 8423(6)  | 4545(5) | 1964(4) | 59(3) |
| C(39) | 9207(7)  | 4462(5) | 1979(4) | 59(3) |
| C(40) | 7333(5)  | 3885(5) | 2421(4) | 56(3) |
| C(41) | 6944(5)  | 4144(5) | 2895(4) | 51(2) |
| C(42) | 7338(5)  | 4616(4) | 3382(4) | 51(2) |
| C(43) | 7324(6)  | 4269(5) | 4012(4) | 70(3) |
| C(44) | 6895(6)  | 5332(5) | 3372(5) | 75(3) |
| C(45) | 6117(6)  | 3940(6) | 2885(5) | 63(3) |
| C(46) | 5761(6)  | 3507(5) | 2453(5) | 61(3) |
| C(47) | 6157(6)  | 3251(5) | 2011(5) | 62(3) |
| C(48) | 6966(6)  | 3430(5) | 1979(5) | 63(3) |
| C(49) | 7415(6)  | 3147(5) | 1452(4) | 62(3) |
| C(50) | 7189(6)  | 3561(5) | 876(4)  | 72(3) |
| C(51) | 7257(6)  | 2367(5) | 1342(5) | 72(3) |
| C(52) | 10918(6) | 3807(5) | 2329(4) | 57(3) |
| C(53) | 11589(6) | 3451(5) | 2555(4) | 60(3) |
| C(54) | 11584(5) | 2923(5) | 2990(4) | 61(3) |
| C(55) | 10832(6) | 2812(5) | 3189(4) | 55(3) |
| C(56) | 9903(6)  | 2294(5) | 3810(5) | 61(3) |
| C(57) | 10774(6) | 1587(5) | 4404(4) | 57(3) |
| C(58) | 11213(6) | 1910(5) | 4030(5) | 63(3) |
| C(59) | 9319(6)  | 1565(6) | 4528(4) | 60(3) |
| C(60) | 9009(6)  | 926(6)  | 4327(5) | 64(3) |
| C(61) | 9373(6)  | 489(6)  | 3861(5) | 70(3) |
| C(62) | 9797(6)  | -170(6) | 4138(5) | 84(4) |
| C(63) | 8758(7)  | 279(6)  | 3327(5) | 80(3) |
| C(64) | 8311(7)  | 666(6)  | 4565(5) | 80(3) |
| C(65) | 7960(7)  | 1063(6) | 4989(5) | 74(3) |

Electronic Supplementary Information for Dalton Transactions  
This journal is © The Royal Society of Chemistry 2005

|       |          |         |         |        |
|-------|----------|---------|---------|--------|
| C(66) | 8267(7)  | 1699(7) | 5182(5) | 80(3)  |
| C(67) | 8936(6)  | 1969(6) | 4960(4) | 64(3)  |
| C(68) | 9295(7)  | 2660(6) | 5183(5) | 74(3)  |
| C(69) | 8640(7)  | 3207(6) | 5277(6) | 100(4) |
| C(70) | 9859(7)  | 2530(6) | 5774(5) | 93(4)  |
| Cl(1) | 3792(1)  | 2519(1) | 2458(1) | 51(1)  |
| Cl(2) | 4383(1)  | 508(1)  | 3693(1) | 46(1)  |
| Cl(3) | 8826(1)  | 2064(1) | 2547(1) | 53(1)  |
| Cl(4) | 9455(1)  | 3941(1) | 3947(1) | 55(1)  |
| N(1)  | 5007(4)  | 1314(4) | 2675(3) | 48(2)  |
| N(2)  | 5716(4)  | 1988(4) | 3400(4) | 52(2)  |
| N(3)  | 5245(4)  | 2415(4) | 4163(4) | 53(2)  |
| N(4)  | 4138(5)  | 659(4)  | 2088(3) | 52(2)  |
| N(5)  | 2869(5)  | 551(4)  | 2157(3) | 55(2)  |
| N(6)  | 10175(5) | 3150(4) | 2979(3) | 50(2)  |
| N(7)  | 9440(4)  | 3945(4) | 2399(3) | 53(2)  |
| N(8)  | 8177(5)  | 4048(4) | 2381(3) | 51(2)  |
| N(9)  | 10691(4) | 2345(4) | 3661(3) | 53(2)  |
| N(10) | 9981(4)  | 1824(4) | 4275(3) | 55(2)  |
| O(1)  | 3196(3)  | 1772(3) | 3539(3) | 58(2)  |
| O(2)  | 8182(3)  | 2760(3) | 3639(3) | 64(2)  |
| V(1)  | 3937(1)  | 1579(1) | 3177(1) | 51(1)  |
| V(2)  | 8990(1)  | 2913(1) | 3340(1) | 56(1)  |

---



Table 3. Bond lengths [ $\text{\AA}$ ] and angles [ $^\circ$ ] for **6**.

---

|              |           |
|--------------|-----------|
| C(1)-N(1)    | 1.342(11) |
| C(1)-C(17)   | 1.402(12) |
| C(1)-N(2)    | 1.414(11) |
| C(2)-N(3)    | 1.337(11) |
| C(2)-N(2)    | 1.378(10) |
| C(2)-V(1)    | 2.169(10) |
| C(3)-C(11)   | 1.369(13) |
| C(3)-C(4)    | 1.404(12) |
| C(3)-N(3)    | 1.459(12) |
| C(4)-C(8)    | 1.392(13) |
| C(4)-C(5)    | 1.532(13) |
| C(5)-C(6)    | 1.511(13) |
| C(5)-C(7)    | 1.528(12) |
| C(5)-H(5)    | 1.0000    |
| C(6)-H(6A)   | 0.9800    |
| C(6)-H(6B)   | 0.9800    |
| C(6)-H(6C)   | 0.9800    |
| C(7)-H(7A)   | 0.9800    |
| C(7)-H(7B)   | 0.9800    |
| C(7)-H(7C)   | 0.9800    |
| C(8)-C(9)    | 1.368(13) |
| C(8)-H(8)    | 0.9500    |
| C(9)-C(10)   | 1.360(13) |
| C(9)-H(9)    | 0.9500    |
| C(10)-C(11)  | 1.407(13) |
| C(10)-H(10)  | 0.9500    |
| C(11)-C(12)  | 1.533(14) |
| C(12)-C(13)  | 1.519(14) |
| C(12)-C(14)  | 1.543(14) |
| C(12)-H(12)  | 1.0000    |
| C(13)-H(13A) | 0.9800    |
| C(13)-H(13B) | 0.9800    |
| C(13)-H(13C) | 0.9800    |

Electronic Supplementary Information for Dalton Transactions  
This journal is © The Royal Society of Chemistry 2005

|              |           |
|--------------|-----------|
| C(14)-H(14A) | 0.9800    |
| C(14)-H(14B) | 0.9800    |
| C(14)-H(14C) | 0.9800    |
| C(15)-C(16)  | 1.345(13) |
| C(15)-N(3)   | 1.409(11) |
| C(15)-H(15)  | 0.9500    |
| C(16)-N(2)   | 1.374(12) |
| C(16)-H(16)  | 0.9500    |
| C(17)-C(18)  | 1.381(13) |
| C(17)-H(17)  | 0.9500    |
| C(18)-C(19)  | 1.351(12) |
| C(18)-H(18)  | 0.9500    |
| C(19)-C(20)  | 1.393(12) |
| C(19)-H(19)  | 0.9500    |
| C(20)-N(1)   | 1.307(11) |
| C(20)-N(4)   | 1.395(11) |
| C(21)-N(4)   | 1.371(10) |
| C(21)-N(5)   | 1.366(11) |
| C(21)-V(1)   | 2.182(11) |
| C(22)-C(23)  | 1.346(12) |
| C(22)-N(5)   | 1.403(11) |
| C(22)-H(22)  | 0.9500    |
| C(23)-N(4)   | 1.407(11) |
| C(23)-H(23)  | 0.9500    |
| C(24)-C(32)  | 1.361(12) |
| C(24)-C(25)  | 1.393(12) |
| C(24)-N(5)   | 1.441(10) |
| C(25)-C(29)  | 1.390(12) |
| C(25)-C(26)  | 1.543(13) |
| C(26)-C(28)  | 1.520(12) |
| C(26)-C(27)  | 1.555(13) |
| C(26)-H(26)  | 1.0000    |
| C(27)-H(27A) | 0.9800    |
| C(27)-H(27B) | 0.9800    |
| C(27)-H(27C) | 0.9800    |

Electronic Supplementary Information for Dalton Transactions  
This journal is © The Royal Society of Chemistry 2005

|              |           |
|--------------|-----------|
| C(28)-H(28A) | 0.9800    |
| C(28)-H(28B) | 0.9800    |
| C(28)-H(28C) | 0.9800    |
| C(29)-C(30)  | 1.365(13) |
| C(29)-H(29)  | 0.9500    |
| C(30)-C(31)  | 1.360(13) |
| C(30)-H(30)  | 0.9500    |
| C(31)-C(32)  | 1.405(12) |
| C(31)-H(31)  | 0.9500    |
| C(32)-C(33)  | 1.539(12) |
| C(33)-C(35)  | 1.497(13) |
| C(33)-C(34)  | 1.512(13) |
| C(33)-H(33)  | 1.0000    |
| C(34)-H(34A) | 0.9800    |
| C(34)-H(34B) | 0.9800    |
| C(34)-H(34C) | 0.9800    |
| C(35)-H(35A) | 0.9800    |
| C(35)-H(35B) | 0.9800    |
| C(35)-H(35C) | 0.9800    |
| C(36)-N(6)   | 1.312(11) |
| C(36)-N(7)   | 1.406(11) |
| C(36)-C(52)  | 1.407(12) |
| C(37)-N(8)   | 1.338(11) |
| C(37)-N(7)   | 1.357(10) |
| C(37)-V(2)   | 2.120(10) |
| C(38)-C(39)  | 1.316(12) |
| C(38)-N(8)   | 1.423(11) |
| C(38)-H(38)  | 0.9500    |
| C(39)-N(7)   | 1.382(11) |
| C(39)-H(39)  | 0.9500    |
| C(40)-C(41)  | 1.395(12) |
| C(40)-C(48)  | 1.397(13) |
| C(40)-N(8)   | 1.456(11) |
| C(41)-C(45)  | 1.433(12) |
| C(41)-C(42)  | 1.498(12) |

Electronic Supplementary Information for Dalton Transactions  
This journal is © The Royal Society of Chemistry 2005

|              |           |
|--------------|-----------|
| C(42)-C(43)  | 1.553(12) |
| C(42)-C(44)  | 1.554(12) |
| C(42)-H(42)  | 1.0000    |
| C(43)-H(43A) | 0.9800    |
| C(43)-H(43B) | 0.9800    |
| C(43)-H(43C) | 0.9800    |
| C(44)-H(44A) | 0.9800    |
| C(44)-H(44B) | 0.9800    |
| C(44)-H(44C) | 0.9800    |
| C(45)-C(46)  | 1.350(13) |
| C(45)-H(45)  | 0.9500    |
| C(46)-C(47)  | 1.343(12) |
| C(46)-H(46)  | 0.9500    |
| C(47)-C(48)  | 1.402(12) |
| C(47)-H(47)  | 0.9500    |
| C(48)-C(49)  | 1.564(13) |
| C(49)-C(50)  | 1.513(13) |
| C(49)-C(51)  | 1.528(13) |
| C(49)-H(49)  | 1.0000    |
| C(50)-H(50A) | 0.9800    |
| C(50)-H(50B) | 0.9800    |
| C(50)-H(50C) | 0.9800    |
| C(51)-H(51A) | 0.9800    |
| C(51)-H(51B) | 0.9800    |
| C(51)-H(51C) | 0.9800    |
| C(52)-C(53)  | 1.355(12) |
| C(52)-H(52)  | 0.9500    |
| C(53)-C(54)  | 1.399(13) |
| C(53)-H(53)  | 0.9500    |
| C(54)-C(55)  | 1.397(12) |
| C(54)-H(54)  | 0.9500    |
| C(55)-N(6)   | 1.309(11) |
| C(55)-N(9)   | 1.419(11) |
| C(56)-N(10)  | 1.365(11) |
| C(56)-N(9)   | 1.398(10) |

Electronic Supplementary Information for Dalton Transactions  
This journal is © The Royal Society of Chemistry 2005

|              |           |
|--------------|-----------|
| C(56)-V(2)   | 2.104(11) |
| C(57)-C(58)  | 1.326(12) |
| C(57)-N(10)  | 1.395(11) |
| C(57)-H(57)  | 0.9500    |
| C(58)-N(9)   | 1.396(11) |
| C(58)-H(58)  | 0.9500    |
| C(59)-C(60)  | 1.380(13) |
| C(59)-N(10)  | 1.392(12) |
| C(59)-C(67)  | 1.441(13) |
| C(60)-C(64)  | 1.426(13) |
| C(60)-C(61)  | 1.515(14) |
| C(61)-C(63)  | 1.525(13) |
| C(61)-C(62)  | 1.538(14) |
| C(61)-H(61)  | 1.0000    |
| C(62)-H(62A) | 0.9800    |
| C(62)-H(62B) | 0.9800    |
| C(62)-H(62C) | 0.9800    |
| C(63)-H(63A) | 0.9800    |
| C(63)-H(63B) | 0.9800    |
| C(63)-H(63C) | 0.9800    |
| C(64)-C(65)  | 1.394(14) |
| C(64)-H(64)  | 0.9500    |
| C(65)-C(66)  | 1.369(14) |
| C(65)-H(65)  | 0.9500    |
| C(66)-C(67)  | 1.374(13) |
| C(66)-H(66)  | 0.9500    |
| C(67)-C(68)  | 1.510(14) |
| C(68)-C(70)  | 1.540(14) |
| C(68)-C(69)  | 1.546(13) |
| C(68)-H(68)  | 1.0000    |
| C(69)-H(69A) | 0.9800    |
| C(69)-H(69B) | 0.9800    |
| C(69)-H(69C) | 0.9800    |
| C(70)-H(70A) | 0.9800    |
| C(70)-H(70B) | 0.9800    |

Electronic Supplementary Information for Dalton Transactions  
This journal is © The Royal Society of Chemistry 2005

|              |          |
|--------------|----------|
| C(70)-H(70C) | 0.9800   |
| Cl(1)-V(1)   | 2.398(3) |
| Cl(2)-V(1)   | 2.421(3) |
| Cl(3)-V(2)   | 2.388(3) |
| Cl(4)-V(2)   | 2.456(3) |
| N(1)-V(1)    | 2.275(7) |
| N(6)-V(2)    | 2.270(7) |
| O(1)-V(1)    | 1.600(5) |
| O(2)-V(2)    | 1.602(6) |

|                  |           |
|------------------|-----------|
| N(1)-C(1)-C(17)  | 122.6(10) |
| N(1)-C(1)-N(2)   | 111.5(8)  |
| C(17)-C(1)-N(2)  | 125.9(10) |
| N(3)-C(2)-N(2)   | 102.6(8)  |
| N(3)-C(2)-V(1)   | 140.4(6)  |
| N(2)-C(2)-V(1)   | 117.0(7)  |
| C(11)-C(3)-C(4)  | 122.5(9)  |
| C(11)-C(3)-N(3)  | 118.6(8)  |
| C(4)-C(3)-N(3)   | 118.5(9)  |
| C(8)-C(4)-C(3)   | 116.7(10) |
| C(8)-C(4)-C(5)   | 120.4(9)  |
| C(3)-C(4)-C(5)   | 122.8(9)  |
| C(6)-C(5)-C(7)   | 110.8(8)  |
| C(6)-C(5)-C(4)   | 112.4(8)  |
| C(7)-C(5)-C(4)   | 110.9(8)  |
| C(6)-C(5)-H(5)   | 107.5     |
| C(7)-C(5)-H(5)   | 107.5     |
| C(4)-C(5)-H(5)   | 107.5     |
| C(5)-C(6)-H(6A)  | 109.5     |
| C(5)-C(6)-H(6B)  | 109.5     |
| H(6A)-C(6)-H(6B) | 109.5     |
| C(5)-C(6)-H(6C)  | 109.5     |
| H(6A)-C(6)-H(6C) | 109.5     |
| H(6B)-C(6)-H(6C) | 109.5     |
| C(5)-C(7)-H(7A)  | 109.5     |

Electronic Supplementary Information for Dalton Transactions  
This journal is © The Royal Society of Chemistry 2005

|                     |           |
|---------------------|-----------|
| C(5)-C(7)-H(7B)     | 109.5     |
| H(7A)-C(7)-H(7B)    | 109.5     |
| C(5)-C(7)-H(7C)     | 109.5     |
| H(7A)-C(7)-H(7C)    | 109.5     |
| H(7B)-C(7)-H(7C)    | 109.5     |
| C(9)-C(8)-C(4)      | 121.1(10) |
| C(9)-C(8)-H(8)      | 119.5     |
| C(4)-C(8)-H(8)      | 119.5     |
| C(10)-C(9)-C(8)     | 121.6(10) |
| C(10)-C(9)-H(9)     | 119.2     |
| C(8)-C(9)-H(9)      | 119.2     |
| C(9)-C(10)-C(11)    | 119.4(10) |
| C(9)-C(10)-H(10)    | 120.3     |
| C(11)-C(10)-H(10)   | 120.3     |
| C(3)-C(11)-C(10)    | 118.6(9)  |
| C(3)-C(11)-C(12)    | 122.7(9)  |
| C(10)-C(11)-C(12)   | 118.7(10) |
| C(13)-C(12)-C(11)   | 115.6(9)  |
| C(13)-C(12)-C(14)   | 111.3(9)  |
| C(11)-C(12)-C(14)   | 109.3(9)  |
| C(13)-C(12)-H(12)   | 106.7     |
| C(11)-C(12)-H(12)   | 106.7     |
| C(14)-C(12)-H(12)   | 106.7     |
| C(12)-C(13)-H(13A)  | 109.5     |
| C(12)-C(13)-H(13B)  | 109.5     |
| H(13A)-C(13)-H(13B) | 109.5     |
| C(12)-C(13)-H(13C)  | 109.5     |
| H(13A)-C(13)-H(13C) | 109.5     |
| H(13B)-C(13)-H(13C) | 109.5     |
| C(12)-C(14)-H(14A)  | 109.5     |
| C(12)-C(14)-H(14B)  | 109.5     |
| H(14A)-C(14)-H(14B) | 109.5     |
| C(12)-C(14)-H(14C)  | 109.5     |
| H(14A)-C(14)-H(14C) | 109.5     |
| H(14B)-C(14)-H(14C) | 109.5     |

Electronic Supplementary Information for Dalton Transactions  
This journal is © The Royal Society of Chemistry 2005

|                   |           |
|-------------------|-----------|
| C(16)-C(15)-N(3)  | 105.5(9)  |
| C(16)-C(15)-H(15) | 127.3     |
| N(3)-C(15)-H(15)  | 127.3     |
| C(15)-C(16)-N(2)  | 106.8(8)  |
| C(15)-C(16)-H(16) | 126.6     |
| N(2)-C(16)-H(16)  | 126.6     |
| C(18)-C(17)-C(1)  | 115.8(9)  |
| C(18)-C(17)-H(17) | 122.1     |
| C(1)-C(17)-H(17)  | 122.1     |
| C(19)-C(18)-C(17) | 122.0(9)  |
| C(19)-C(18)-H(18) | 119.0     |
| C(17)-C(18)-H(18) | 119.0     |
| C(18)-C(19)-C(20) | 117.9(10) |
| C(18)-C(19)-H(19) | 121.1     |
| C(20)-C(19)-H(19) | 121.1     |
| N(1)-C(20)-N(4)   | 110.3(8)  |
| N(1)-C(20)-C(19)  | 122.5(9)  |
| N(4)-C(20)-C(19)  | 127.2(10) |
| N(4)-C(21)-N(5)   | 103.7(8)  |
| N(4)-C(21)-V(1)   | 116.0(7)  |
| N(5)-C(21)-V(1)   | 140.1(7)  |
| C(23)-C(22)-N(5)  | 109.0(9)  |
| C(23)-C(22)-H(22) | 125.5     |
| N(5)-C(22)-H(22)  | 125.5     |
| C(22)-C(23)-N(4)  | 104.4(8)  |
| C(22)-C(23)-H(23) | 127.8     |
| N(4)-C(23)-H(23)  | 127.8     |
| C(32)-C(24)-C(25) | 123.2(8)  |
| C(32)-C(24)-N(5)  | 117.4(8)  |
| C(25)-C(24)-N(5)  | 119.3(8)  |
| C(29)-C(25)-C(24) | 117.5(9)  |
| C(29)-C(25)-C(26) | 118.0(8)  |
| C(24)-C(25)-C(26) | 124.5(8)  |
| C(28)-C(26)-C(25) | 110.9(8)  |
| C(28)-C(26)-C(27) | 110.1(8)  |



Electronic Supplementary Information for Dalton Transactions  
This journal is © The Royal Society of Chemistry 2005

|                     |           |
|---------------------|-----------|
| C(25)-C(26)-C(27)   | 110.3(8)  |
| C(28)-C(26)-H(26)   | 108.5     |
| C(25)-C(26)-H(26)   | 108.5     |
| C(27)-C(26)-H(26)   | 108.5     |
| C(26)-C(27)-H(27A)  | 109.5     |
| C(26)-C(27)-H(27B)  | 109.5     |
| H(27A)-C(27)-H(27B) | 109.5     |
| C(26)-C(27)-H(27C)  | 109.5     |
| H(27A)-C(27)-H(27C) | 109.5     |
| H(27B)-C(27)-H(27C) | 109.5     |
| C(26)-C(28)-H(28A)  | 109.5     |
| C(26)-C(28)-H(28B)  | 109.5     |
| H(28A)-C(28)-H(28B) | 109.5     |
| C(26)-C(28)-H(28C)  | 109.5     |
| H(28A)-C(28)-H(28C) | 109.5     |
| H(28B)-C(28)-H(28C) | 109.5     |
| C(30)-C(29)-C(25)   | 119.5(9)  |
| C(30)-C(29)-H(29)   | 120.3     |
| C(25)-C(29)-H(29)   | 120.3     |
| C(31)-C(30)-C(29)   | 122.8(9)  |
| C(31)-C(30)-H(30)   | 118.6     |
| C(29)-C(30)-H(30)   | 118.6     |
| C(30)-C(31)-C(32)   | 118.9(10) |
| C(30)-C(31)-H(31)   | 120.6     |
| C(32)-C(31)-H(31)   | 120.6     |
| C(24)-C(32)-C(31)   | 118.2(8)  |
| C(24)-C(32)-C(33)   | 123.5(8)  |
| C(31)-C(32)-C(33)   | 118.3(9)  |
| C(35)-C(33)-C(34)   | 113.1(9)  |
| C(35)-C(33)-C(32)   | 112.0(8)  |
| C(34)-C(33)-C(32)   | 111.6(8)  |
| C(35)-C(33)-H(33)   | 106.5     |
| C(34)-C(33)-H(33)   | 106.5     |
| C(32)-C(33)-H(33)   | 106.5     |
| C(33)-C(34)-H(34A)  | 109.5     |

Electronic Supplementary Information for Dalton Transactions  
This journal is © The Royal Society of Chemistry 2005

|                     |          |
|---------------------|----------|
| C(33)-C(34)-H(34B)  | 109.5    |
| H(34A)-C(34)-H(34B) | 109.5    |
| C(33)-C(34)-H(34C)  | 109.5    |
| H(34A)-C(34)-H(34C) | 109.5    |
| H(34B)-C(34)-H(34C) | 109.5    |
| C(33)-C(35)-H(35A)  | 109.5    |
| C(33)-C(35)-H(35B)  | 109.5    |
| H(35A)-C(35)-H(35B) | 109.5    |
| C(33)-C(35)-H(35C)  | 109.5    |
| H(35A)-C(35)-H(35C) | 109.5    |
| H(35B)-C(35)-H(35C) | 109.5    |
| N(6)-C(36)-N(7)     | 112.3(8) |
| N(6)-C(36)-C(52)    | 121.7(9) |
| N(7)-C(36)-C(52)    | 126.0(9) |
| N(8)-C(37)-N(7)     | 103.3(8) |
| N(8)-C(37)-V(2)     | 136.4(7) |
| N(7)-C(37)-V(2)     | 120.1(7) |
| C(39)-C(38)-N(8)    | 105.6(9) |
| C(39)-C(38)-H(38)   | 127.2    |
| N(8)-C(38)-H(38)    | 127.2    |
| C(38)-C(39)-N(7)    | 107.4(9) |
| C(38)-C(39)-H(39)   | 126.3    |
| N(7)-C(39)-H(39)    | 126.3    |
| C(41)-C(40)-C(48)   | 123.2(9) |
| C(41)-C(40)-N(8)    | 120.9(9) |
| C(48)-C(40)-N(8)    | 115.8(8) |
| C(40)-C(41)-C(45)   | 115.3(9) |
| C(40)-C(41)-C(42)   | 123.8(8) |
| C(45)-C(41)-C(42)   | 120.9(9) |
| C(41)-C(42)-C(43)   | 109.8(7) |
| C(41)-C(42)-C(44)   | 110.7(8) |
| C(43)-C(42)-C(44)   | 109.3(8) |
| C(41)-C(42)-H(42)   | 109.0    |
| C(43)-C(42)-H(42)   | 109.0    |
| C(44)-C(42)-H(42)   | 109.0    |

Electronic Supplementary Information for Dalton Transactions  
This journal is © The Royal Society of Chemistry 2005

|                     |           |
|---------------------|-----------|
| C(42)-C(43)-H(43A)  | 109.5     |
| C(42)-C(43)-H(43B)  | 109.5     |
| H(43A)-C(43)-H(43B) | 109.5     |
| C(42)-C(43)-H(43C)  | 109.5     |
| H(43A)-C(43)-H(43C) | 109.5     |
| H(43B)-C(43)-H(43C) | 109.5     |
| C(42)-C(44)-H(44A)  | 109.5     |
| C(42)-C(44)-H(44B)  | 109.5     |
| H(44A)-C(44)-H(44B) | 109.5     |
| C(42)-C(44)-H(44C)  | 109.5     |
| H(44A)-C(44)-H(44C) | 109.5     |
| H(44B)-C(44)-H(44C) | 109.5     |
| C(46)-C(45)-C(41)   | 121.2(9)  |
| C(46)-C(45)-H(45)   | 119.4     |
| C(41)-C(45)-H(45)   | 119.4     |
| C(47)-C(46)-C(45)   | 122.1(9)  |
| C(47)-C(46)-H(46)   | 119.0     |
| C(45)-C(46)-H(46)   | 119.0     |
| C(46)-C(47)-C(48)   | 120.7(10) |
| C(46)-C(47)-H(47)   | 119.7     |
| C(48)-C(47)-H(47)   | 119.7     |
| C(40)-C(48)-C(47)   | 117.4(9)  |
| C(40)-C(48)-C(49)   | 122.2(9)  |
| C(47)-C(48)-C(49)   | 120.4(10) |
| C(50)-C(49)-C(51)   | 110.8(8)  |
| C(50)-C(49)-C(48)   | 111.1(8)  |
| C(51)-C(49)-C(48)   | 111.6(8)  |
| C(50)-C(49)-H(49)   | 107.7     |
| C(51)-C(49)-H(49)   | 107.7     |
| C(48)-C(49)-H(49)   | 107.7     |
| C(49)-C(50)-H(50A)  | 109.5     |
| C(49)-C(50)-H(50B)  | 109.5     |
| H(50A)-C(50)-H(50B) | 109.5     |
| C(49)-C(50)-H(50C)  | 109.5     |
| H(50A)-C(50)-H(50C) | 109.5     |

Electronic Supplementary Information for Dalton Transactions  
This journal is © The Royal Society of Chemistry 2005

|                     |           |
|---------------------|-----------|
| H(50B)-C(50)-H(50C) | 109.5     |
| C(49)-C(51)-H(51A)  | 109.5     |
| C(49)-C(51)-H(51B)  | 109.5     |
| H(51A)-C(51)-H(51B) | 109.5     |
| C(49)-C(51)-H(51C)  | 109.5     |
| H(51A)-C(51)-H(51C) | 109.5     |
| H(51B)-C(51)-H(51C) | 109.5     |
| C(53)-C(52)-C(36)   | 116.8(9)  |
| C(53)-C(52)-H(52)   | 121.6     |
| C(36)-C(52)-H(52)   | 121.6     |
| C(52)-C(53)-C(54)   | 123.0(9)  |
| C(52)-C(53)-H(53)   | 118.5     |
| C(54)-C(53)-H(53)   | 118.5     |
| C(55)-C(54)-C(53)   | 114.2(10) |
| C(55)-C(54)-H(54)   | 122.9     |
| C(53)-C(54)-H(54)   | 122.9     |
| N(6)-C(55)-C(54)    | 123.9(9)  |
| N(6)-C(55)-N(9)     | 111.6(8)  |
| C(54)-C(55)-N(9)    | 124.4(10) |
| N(10)-C(56)-N(9)    | 102.7(8)  |
| N(10)-C(56)-V(2)    | 137.9(6)  |
| N(9)-C(56)-V(2)     | 119.4(7)  |
| C(58)-C(57)-N(10)   | 107.7(9)  |
| C(58)-C(57)-H(57)   | 126.2     |
| N(10)-C(57)-H(57)   | 126.2     |
| C(57)-C(58)-N(9)    | 107.0(8)  |
| C(57)-C(58)-H(58)   | 126.5     |
| N(9)-C(58)-H(58)    | 126.5     |
| C(60)-C(59)-N(10)   | 118.0(9)  |
| C(60)-C(59)-C(67)   | 120.7(9)  |
| N(10)-C(59)-C(67)   | 121.2(10) |
| C(59)-C(60)-C(64)   | 118.7(10) |
| C(59)-C(60)-C(61)   | 123.0(8)  |
| C(64)-C(60)-C(61)   | 118.4(10) |
| C(60)-C(61)-C(63)   | 113.0(9)  |

Electronic Supplementary Information for Dalton Transactions  
This journal is © The Royal Society of Chemistry 2005

|                     |           |
|---------------------|-----------|
| C(60)-C(61)-C(62)   | 112.4(8)  |
| C(63)-C(61)-C(62)   | 109.3(9)  |
| C(60)-C(61)-H(61)   | 107.3     |
| C(63)-C(61)-H(61)   | 107.3     |
| C(62)-C(61)-H(61)   | 107.3     |
| C(61)-C(62)-H(62A)  | 109.5     |
| C(61)-C(62)-H(62B)  | 109.5     |
| H(62A)-C(62)-H(62B) | 109.5     |
| C(61)-C(62)-H(62C)  | 109.5     |
| H(62A)-C(62)-H(62C) | 109.5     |
| H(62B)-C(62)-H(62C) | 109.5     |
| C(61)-C(63)-H(63A)  | 109.5     |
| C(61)-C(63)-H(63B)  | 109.5     |
| H(63A)-C(63)-H(63B) | 109.5     |
| C(61)-C(63)-H(63C)  | 109.5     |
| H(63A)-C(63)-H(63C) | 109.5     |
| H(63B)-C(63)-H(63C) | 109.5     |
| C(65)-C(64)-C(60)   | 119.4(11) |
| C(65)-C(64)-H(64)   | 120.3     |
| C(60)-C(64)-H(64)   | 120.3     |
| C(66)-C(65)-C(64)   | 121.5(10) |
| C(66)-C(65)-H(65)   | 119.3     |
| C(64)-C(65)-H(65)   | 119.3     |
| C(65)-C(66)-C(67)   | 120.8(10) |
| C(65)-C(66)-H(66)   | 119.6     |
| C(67)-C(66)-H(66)   | 119.6     |
| C(66)-C(67)-C(59)   | 118.9(11) |
| C(66)-C(67)-C(68)   | 121.3(10) |
| C(59)-C(67)-C(68)   | 119.8(9)  |
| C(67)-C(68)-C(70)   | 108.4(9)  |
| C(67)-C(68)-C(69)   | 112.1(9)  |
| C(70)-C(68)-C(69)   | 111.3(9)  |
| C(67)-C(68)-H(68)   | 108.3     |
| C(70)-C(68)-H(68)   | 108.3     |
| C(69)-C(68)-H(68)   | 108.3     |

Electronic Supplementary Information for Dalton Transactions  
This journal is © The Royal Society of Chemistry 2005

|                     |          |
|---------------------|----------|
| C(68)-C(69)-H(69A)  | 109.5    |
| C(68)-C(69)-H(69B)  | 109.5    |
| H(69A)-C(69)-H(69B) | 109.5    |
| C(68)-C(69)-H(69C)  | 109.5    |
| H(69A)-C(69)-H(69C) | 109.5    |
| H(69B)-C(69)-H(69C) | 109.5    |
| C(68)-C(70)-H(70A)  | 109.5    |
| C(68)-C(70)-H(70B)  | 109.5    |
| H(70A)-C(70)-H(70B) | 109.5    |
| C(68)-C(70)-H(70C)  | 109.5    |
| H(70A)-C(70)-H(70C) | 109.5    |
| H(70B)-C(70)-H(70C) | 109.5    |
| C(20)-N(1)-C(1)     | 119.1(8) |
| C(20)-N(1)-V(1)     | 121.4(6) |
| C(1)-N(1)-V(1)      | 119.4(6) |
| C(16)-N(2)-C(2)     | 112.3(8) |
| C(16)-N(2)-C(1)     | 127.2(8) |
| C(2)-N(2)-C(1)      | 120.3(8) |
| C(2)-N(3)-C(15)     | 112.8(8) |
| C(2)-N(3)-C(3)      | 128.4(8) |
| C(15)-N(3)-C(3)     | 118.8(8) |
| C(21)-N(4)-C(20)    | 121.7(9) |
| C(21)-N(4)-C(23)    | 112.7(8) |
| C(20)-N(4)-C(23)    | 125.6(8) |
| C(21)-N(5)-C(22)    | 110.1(7) |
| C(21)-N(5)-C(24)    | 124.7(8) |
| C(22)-N(5)-C(24)    | 124.5(8) |
| C(55)-N(6)-C(36)    | 120.3(8) |
| C(55)-N(6)-V(2)     | 120.2(6) |
| C(36)-N(6)-V(2)     | 119.4(7) |
| C(37)-N(7)-C(39)    | 112.0(8) |
| C(37)-N(7)-C(36)    | 117.5(9) |
| C(39)-N(7)-C(36)    | 130.4(8) |
| C(37)-N(8)-C(38)    | 111.7(7) |
| C(37)-N(8)-C(40)    | 124.6(8) |

Electronic Supplementary Information for Dalton Transactions  
This journal is © The Royal Society of Chemistry 2005

|                   |            |
|-------------------|------------|
| C(38)-N(8)-C(40)  | 122.8(8)   |
| C(56)-N(9)-C(58)  | 111.0(8)   |
| C(56)-N(9)-C(55)  | 117.6(9)   |
| C(58)-N(9)-C(55)  | 131.4(8)   |
| C(56)-N(10)-C(59) | 122.3(8)   |
| C(56)-N(10)-C(57) | 111.7(8)   |
| C(59)-N(10)-C(57) | 125.6(8)   |
| O(1)-V(1)-C(2)    | 107.3(3)   |
| O(1)-V(1)-C(21)   | 110.6(3)   |
| C(2)-V(1)-C(21)   | 141.9(4)   |
| O(1)-V(1)-N(1)    | 178.9(3)   |
| C(2)-V(1)-N(1)    | 71.6(3)    |
| C(21)-V(1)-N(1)   | 70.4(3)    |
| O(1)-V(1)-Cl(1)   | 98.1(2)    |
| C(2)-V(1)-Cl(1)   | 91.1(2)    |
| C(21)-V(1)-Cl(1)  | 86.7(2)    |
| N(1)-V(1)-Cl(1)   | 82.10(18)  |
| O(1)-V(1)-Cl(2)   | 99.7(2)    |
| C(2)-V(1)-Cl(2)   | 86.5(2)    |
| C(21)-V(1)-Cl(2)  | 84.3(2)    |
| N(1)-V(1)-Cl(2)   | 80.18(18)  |
| Cl(1)-V(1)-Cl(2)  | 161.97(10) |
| O(2)-V(2)-C(56)   | 106.7(3)   |
| O(2)-V(2)-C(37)   | 111.7(3)   |
| C(56)-V(2)-C(37)  | 141.5(4)   |
| O(2)-V(2)-N(6)    | 176.2(3)   |
| C(56)-V(2)-N(6)   | 71.2(3)    |
| C(37)-V(2)-N(6)   | 70.3(3)    |
| O(2)-V(2)-Cl(3)   | 99.0(2)    |
| C(56)-V(2)-Cl(3)  | 89.7(3)    |
| C(37)-V(2)-Cl(3)  | 86.4(2)    |
| N(6)-V(2)-Cl(3)   | 84.32(18)  |
| O(2)-V(2)-Cl(4)   | 98.3(2)    |
| C(56)-V(2)-Cl(4)  | 90.9(3)    |
| C(37)-V(2)-Cl(4)  | 81.8(2)    |

Electronic Supplementary Information for Dalton Transactions  
This journal is © The Royal Society of Chemistry 2005

|                  |            |
|------------------|------------|
| N(6)-V(2)-Cl(4)  | 78.66(18)  |
| Cl(3)-V(2)-Cl(4) | 161.78(10) |

---

Symmetry transformations used to generate equivalent atoms:



Table 4. Anisotropic displacement parameters ( $\approx 2 \times 10^3$ ) for **6**. The anisotropic displacement factor exponent takes the form:  $-2\pi^2 [ h^2 a^* U^{11} + \dots + 2 h k a^* b^* U^{12} ]$

|       | U <sup>11</sup> | U <sup>22</sup> | U <sup>33</sup> | U <sup>23</sup> | U <sup>13</sup> | U <sup>12</sup> |
|-------|-----------------|-----------------|-----------------|-----------------|-----------------|-----------------|
| C(1)  | 51(7)           | 45(6)           | 62(7)           | 17(5)           | 11(6)           | 5(5)            |
| C(2)  | 43(6)           | 65(7)           | 44(6)           | 16(5)           | 18(5)           | 4(5)            |
| C(3)  | 40(6)           | 66(7)           | 58(7)           | 9(6)            | 4(5)            | -1(5)           |
| C(4)  | 53(6)           | 70(7)           | 48(6)           | 6(6)            | 9(5)            | 0(5)            |
| C(5)  | 62(7)           | 71(8)           | 51(6)           | 2(5)            | 12(5)           | -4(6)           |
| C(6)  | 88(8)           | 60(7)           | 79(8)           | -6(6)           | 4(7)            | 4(6)            |
| C(7)  | 91(8)           | 83(8)           | 61(7)           | 10(6)           | 18(6)           | -1(7)           |
| C(8)  | 55(6)           | 91(9)           | 66(8)           | 4(6)            | 14(6)           | -4(6)           |
| C(9)  | 78(7)           | 66(8)           | 57(7)           | -2(6)           | 14(6)           | 22(6)           |
| C(10) | 71(7)           | 81(8)           | 77(8)           | 16(7)           | 15(6)           | 28(6)           |
| C(11) | 51(6)           | 72(8)           | 69(7)           | 3(6)            | 23(6)           | -4(6)           |
| C(12) | 78(8)           | 75(8)           | 74(8)           | 11(6)           | 21(7)           | 18(6)           |
| C(13) | 95(8)           | 59(7)           | 91(8)           | 16(6)           | 37(7)           | 3(6)            |
| C(14) | 95(9)           | 105(10)         | 93(9)           | 8(8)            | 14(8)           | 16(8)           |
| C(15) | 44(7)           | 55(7)           | 82(8)           | 9(6)            | 1(6)            | -7(5)           |
| C(16) | 54(7)           | 77(8)           | 63(7)           | 11(6)           | 29(6)           | 7(6)            |
| C(17) | 36(6)           | 84(8)           | 90(9)           | 26(7)           | 25(6)           | 6(5)            |
| C(18) | 47(7)           | 79(8)           | 63(7)           | -1(6)           | 23(6)           | 3(6)            |
| C(19) | 60(7)           | 90(8)           | 49(6)           | 18(6)           | 23(6)           | 6(6)            |
| C(20) | 45(7)           | 61(7)           | 54(7)           | 18(6)           | 4(6)            | 6(5)            |
| C(21) | 70(7)           | 58(7)           | 48(6)           | 23(5)           | 27(6)           | 21(6)           |
| C(22) | 71(7)           | 55(6)           | 31(5)           | -1(5)           | 16(5)           | 4(5)            |
| C(23) | 68(7)           | 68(7)           | 46(6)           | 3(6)            | 29(6)           | 8(6)            |
| C(24) | 48(6)           | 52(6)           | 50(6)           | 5(5)            | 20(5)           | 3(5)            |
| C(25) | 50(6)           | 56(6)           | 55(6)           | 3(5)            | 24(5)           | -4(5)           |
| C(26) | 70(7)           | 55(7)           | 71(7)           | 4(6)            | 41(6)           | -1(6)           |
| C(27) | 76(7)           | 72(8)           | 88(8)           | 2(6)            | 26(6)           | 19(6)           |
| C(28) | 82(7)           | 68(7)           | 47(6)           | 7(5)            | 21(5)           | -14(6)          |
| C(29) | 70(8)           | 72(8)           | 75(8)           | 19(6)           | 32(6)           | -6(6)           |
| C(30) | 57(6)           | 73(8)           | 75(8)           | 5(6)            | 28(6)           | 11(6)           |

Electronic Supplementary Information for Dalton Transactions  
This journal is © The Royal Society of Chemistry 2005

|       |       |         |        |        |       |        |
|-------|-------|---------|--------|--------|-------|--------|
| C(31) | 54(7) | 77(8)   | 79(8)  | 8(6)   | 20(6) | 2(6)   |
| C(32) | 59(7) | 53(6)   | 49(6)  | 13(5)  | 5(5)  | 1(5)   |
| C(33) | 40(5) | 79(8)   | 49(6)  | 1(5)   | 5(5)  | -6(5)  |
| C(34) | 87(8) | 122(10) | 67(8)  | 15(7)  | 8(7)  | -25(8) |
| C(35) | 83(8) | 67(8)   | 100(9) | 21(6)  | 33(7) | 5(6)   |
| C(36) | 58(7) | 62(7)   | 40(6)  | -6(5)  | 10(5) | -8(6)  |
| C(37) | 46(6) | 65(7)   | 44(6)  | -9(5)  | 5(5)  | -7(6)  |
| C(38) | 58(7) | 54(7)   | 67(7)  | -3(5)  | 21(6) | 3(5)   |
| C(39) | 72(8) | 50(7)   | 59(7)  | -5(6)  | 17(6) | -3(6)  |
| C(40) | 49(6) | 70(7)   | 51(6)  | 6(6)   | 14(5) | -3(5)  |
| C(41) | 63(7) | 53(6)   | 40(6)  | 2(5)   | 17(5) | 0(5)   |
| C(42) | 53(6) | 43(6)   | 58(6)  | -1(5)  | 6(5)  | -2(5)  |
| C(43) | 84(8) | 71(7)   | 59(7)  | 9(6)   | 22(6) | -4(6)  |
| C(44) | 77(7) | 83(8)   | 71(7)  | 0(6)   | 31(6) | -3(6)  |
| C(45) | 45(6) | 75(8)   | 76(8)  | 29(7)  | 34(6) | 4(6)   |
| C(46) | 49(6) | 64(7)   | 72(7)  | -3(6)  | 14(6) | -7(6)  |
| C(47) | 55(7) | 71(7)   | 59(7)  | -5(5)  | 6(6)  | -4(6)  |
| C(48) | 62(7) | 64(7)   | 64(7)  | 10(6)  | 7(6)  | -6(6)  |
| C(49) | 60(6) | 73(8)   | 57(7)  | -8(6)  | 19(5) | 5(6)   |
| C(50) | 72(7) | 79(8)   | 66(7)  | -5(6)  | 8(6)  | -10(6) |
| C(51) | 78(7) | 70(8)   | 66(7)  | -11(6) | 3(6)  | 7(6)   |
| C(52) | 44(6) | 64(7)   | 64(7)  | -5(5)  | 7(6)  | -4(5)  |
| C(53) | 70(8) | 66(7)   | 48(6)  | 7(6)   | 19(6) | -14(6) |
| C(54) | 39(6) | 82(8)   | 64(7)  | -23(6) | 21(5) | -14(5) |
| C(55) | 68(7) | 51(6)   | 48(6)  | -11(5) | 9(6)  | -7(6)  |
| C(56) | 57(7) | 59(7)   | 74(8)  | -1(6)  | 36(6) | -8(5)  |
| C(57) | 53(7) | 72(7)   | 45(6)  | -6(5)  | 4(5)  | 5(6)   |
| C(58) | 49(6) | 79(8)   | 61(7)  | -8(6)  | 8(6)  | 2(6)   |
| C(59) | 67(7) | 66(8)   | 47(6)  | 8(6)   | 8(6)  | 6(6)   |
| C(60) | 53(6) | 73(8)   | 72(7)  | 27(6)  | 35(6) | 6(6)   |
| C(61) | 63(7) | 89(8)   | 60(7)  | 6(6)   | 16(6) | -6(6)  |
| C(62) | 65(7) | 101(9)  | 94(9)  | -3(7)  | 40(7) | -3(7)  |
| C(63) | 98(9) | 78(8)   | 67(8)  | 8(6)   | 28(7) | -12(7) |
| C(64) | 95(9) | 69(8)   | 79(8)  | 3(6)   | 27(7) | 3(7)   |
| C(65) | 84(8) | 69(8)   | 79(8)  | 25(7)  | 47(7) | 0(7)   |

Electronic Supplementary Information for Dalton Transactions  
This journal is © The Royal Society of Chemistry 2005

|       |       |         |        |       |       |        |
|-------|-------|---------|--------|-------|-------|--------|
| C(66) | 94(9) | 96(10)  | 58(7)  | 27(7) | 43(7) | 18(8)  |
| C(67) | 68(7) | 76(8)   | 52(6)  | 16(6) | 24(6) | 11(6)  |
| C(68) | 85(8) | 81(9)   | 57(7)  | 5(6)  | 11(6) | 9(7)   |
| C(69) | 83(8) | 119(10) | 103(9) | 5(8)  | 34(7) | 41(8)  |
| C(70) | 97(9) | 100(10) | 78(9)  | 0(7)  | -5(7) | 21(7)  |
| Cl(1) | 38(1) | 50(1)   | 67(2)  | 19(1) | 9(1)  | 0(1)   |
| Cl(2) | 54(1) | 46(1)   | 43(1)  | 1(1)  | 19(1) | 9(1)   |
| Cl(3) | 57(1) | 50(2)   | 53(1)  | -3(1) | 4(1)  | 1(1)   |
| Cl(4) | 60(2) | 63(2)   | 46(1)  | 4(1)  | 16(1) | 4(1)   |
| N(1)  | 48(5) | 50(5)   | 45(5)  | 6(4)  | 4(4)  | -10(4) |
| N(2)  | 30(4) | 59(5)   | 67(6)  | 4(5)  | 10(5) | -7(4)  |
| N(3)  | 47(5) | 64(5)   | 52(5)  | 5(4)  | 17(4) | 9(4)   |
| N(4)  | 53(6) | 71(6)   | 34(5)  | 7(4)  | 13(4) | 9(4)   |
| N(5)  | 41(5) | 71(6)   | 52(5)  | 1(4)  | 4(4)  | 1(4)   |
| N(6)  | 52(5) | 56(5)   | 43(5)  | -9(4) | 12(4) | 1(4)   |
| N(7)  | 37(5) | 70(6)   | 56(5)  | -2(5) | 17(4) | -2(5)  |
| N(8)  | 55(5) | 56(5)   | 45(5)  | -2(4) | 19(4) | -12(5) |
| N(9)  | 43(5) | 62(6)   | 55(5)  | -8(5) | 8(4)  | 0(4)   |
| N(10) | 46(5) | 67(6)   | 54(5)  | 3(4)  | 20(4) | 5(4)   |
| O(1)  | 45(4) | 62(4)   | 69(4)  | 2(3)  | 22(3) | 5(3)   |
| O(2)  | 52(4) | 75(5)   | 70(4)  | 6(4)  | 25(3) | 8(3)   |
| V(1)  | 45(1) | 58(1)   | 53(1)  | 6(1)  | 17(1) | 4(1)   |
| V(2)  | 47(1) | 71(1)   | 50(1)  | -1(1) | 15(1) | -1(1)  |

---

### Structural Data for 7

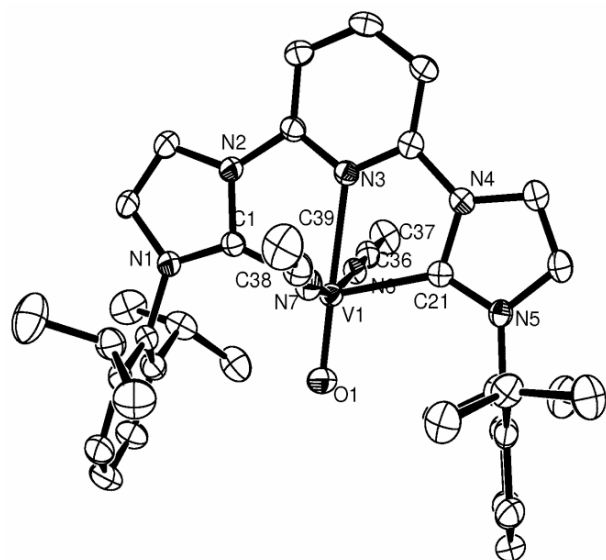

Table 1. Crystal data and structure refinement for 7.

|                                   |                                                                                  |                   |
|-----------------------------------|----------------------------------------------------------------------------------|-------------------|
| Identification code               | 7                                                                                |                   |
| Empirical formula                 | C <sub>41</sub> H <sub>50</sub> B <sub>2</sub> F <sub>8</sub> N <sub>8</sub> O V |                   |
| Formula weight                    | 895.45                                                                           |                   |
| Temperature                       | 120(2) K                                                                         |                   |
| Wavelength                        | 0.71073 Å                                                                        |                   |
| Crystal system                    | Monoclinic                                                                       |                   |
| Space group                       | P2 <sub>1</sub> /c                                                               |                   |
| Unit cell dimensions              | a = 16.851(3) Å                                                                  | α = 90°.          |
|                                   | b = 12.707(4) Å                                                                  | β = 100.152(13)°. |
|                                   | c = 21.564(4) Å                                                                  | γ = 90°.          |
| Volume                            | 4545.1(18) Å <sup>3</sup>                                                        |                   |
| Z                                 | 4                                                                                |                   |
| Density (calculated)              | 1.309 Mg/m <sup>3</sup>                                                          |                   |
| Absorption coefficient            | 0.292 mm <sup>-1</sup>                                                           |                   |
| F(000)                            | 1860                                                                             |                   |
| Crystal size                      | 0.50 x 0.20 x 0.02 mm <sup>3</sup>                                               |                   |
| Theta range for data collection   | 2.93 to 27.65°.                                                                  |                   |
| Index ranges                      | -21 ≤ h ≤ 21, -16 ≤ k ≤ 16, -28 ≤ l ≤ 28                                         |                   |
| Reflections collected             | 66201                                                                            |                   |
| Independent reflections           | 10463 [R(int) = 0.0687]                                                          |                   |
| Completeness to theta = 27.65°    | 98.8 %                                                                           |                   |
| Absorption correction             | Semi-empirical from equivalents                                                  |                   |
| Max. and min. transmission        | 0.9942 and 0.8634                                                                |                   |
| Refinement method                 | Full-matrix least-squares on F <sup>2</sup>                                      |                   |
| Data / restraints / parameters    | 10463 / 0 / 561                                                                  |                   |
| Goodness-of-fit on F <sup>2</sup> | 1.018                                                                            |                   |
| Final R indices [I > 2σ(I)]       | R1 = 0.0604, wR2 = 0.1382                                                        |                   |
| R indices (all data)              | R1 = 0.0957, wR2 = 0.1564                                                        |                   |
| Largest diff. peak and hole       | 1.651 and -0.672 e. Å <sup>-3</sup>                                              |                   |

Table 2. Atomic coordinates ( $\times 10^4$ ) and equivalent isotropic displacement parameters ( $\approx^2 \times 10^3$ ) for 7.  $U(\text{eq})$  is defined as one third of the trace of the orthogonalized  $U^{ij}$  tensor.

|       | x       | y        | z       | U(eq) |
|-------|---------|----------|---------|-------|
| V(1)  | 2492(1) | 212(1)   | 1120(1) | 19(1) |
| F(4)  | 4568(2) | 578(2)   | 3982(1) | 81(1) |
| F(3)  | 5427(1) | 532(1)   | 3301(1) | 46(1) |
| F(8)  | 6623(2) | 2124(2)  | 1380(1) | 81(1) |
| O(1)  | 1588(1) | 617(2)   | 932(1)  | 30(1) |
| F(2)  | 4381(1) | -598(2)  | 3184(1) | 60(1) |
| F(1)  | 4148(1) | 1119(2)  | 2997(1) | 50(1) |
| N(4)  | 4055(1) | 1385(2)  | 1572(1) | 22(1) |
| N(7)  | 2848(1) | 245(2)   | 239(1)  | 26(1) |
| C(36) | 2557(2) | -120(2)  | 2608(1) | 26(1) |
| C(38) | 3132(2) | 234(2)   | -200(1) | 30(1) |
| N(5)  | 3171(1) | 2604(2)  | 1372(1) | 22(1) |
| F(5)  | 7121(2) | 907(2)   | 2111(1) | 85(1) |
| N(2)  | 3209(1) | -1975(2) | 1246(1) | 23(1) |
| F(7)  | 7598(2) | 2559(2)  | 2184(1) | 94(1) |
| N(6)  | 2499(1) | 6(2)     | 2081(1) | 23(1) |
| C(25) | 1857(2) | 3244(2)  | 1554(1) | 28(1) |
| F(6)  | 6361(2) | 2209(2)  | 2339(1) | 87(1) |
| C(26) | 1153(2) | 3803(2)  | 1327(2) | 34(1) |
| C(40) | 5120(2) | 2247(3)  | 239(2)  | 44(1) |
| C(8)  | -232(2) | -1938(3) | 867(1)  | 36(1) |
| N(3)  | 3757(1) | -348(2)  | 1431(1) | 21(1) |
| C(17) | 4676(2) | -1776(2) | 1669(1) | 26(1) |
| C(2)  | 3115(2) | -3054(2) | 1208(1) | 29(1) |
| N(1)  | 1958(1) | -2235(2) | 887(1)  | 23(1) |
| C(6)  | 19(2)   | -1724(2) | -182(1) | 34(1) |
| C(34) | 3322(2) | 4539(3)  | 46(2)   | 42(1) |
| C(22) | 4466(2) | 2325(2)  | 1714(1) | 25(1) |
| C(37) | 2610(2) | -243(3)  | 3284(1) | 37(1) |
| C(29) | 2299(2) | 3577(2)  | 543(1)  | 26(1) |

Electronic Supplementary Information for Dalton Transactions  
This journal is © The Royal Society of Chemistry 2005

|       |         |          |         |       |
|-------|---------|----------|---------|-------|
| C(7)  | -510(2) | -1752(3) | 238(2)  | 38(1) |
| C(28) | 1583(2) | 4120(2)  | 341(1)  | 33(1) |
| C(21) | 3249(2) | 1553(2)  | 1360(1) | 21(1) |
| C(27) | 1020(2) | 4237(2)  | 732(2)  | 36(1) |
| C(24) | 2422(2) | 3156(2)  | 1153(1) | 24(1) |
| C(10) | 888(2)  | -2265(3) | 1797(1) | 35(1) |
| C(23) | 3914(2) | 3089(2)  | 1587(1) | 26(1) |
| C(16) | 3914(2) | -1373(2) | 1459(1) | 22(1) |
| C(5)  | 844(2)  | -1887(2) | 17(1)   | 27(1) |
| C(39) | 3499(2) | 213(3)   | -762(1) | 45(1) |
| C(30) | 1984(2) | 2766(2)  | 2209(1) | 33(1) |
| C(9)  | 588(2)  | -2088(2) | 1099(1) | 29(1) |
| C(18) | 5281(2) | -1039(2) | 1855(1) | 28(1) |
| C(12) | 594(2)  | -1393(3) | 2192(2) | 43(1) |
| C(15) | 1242(2) | -995(3)  | -935(2) | 48(1) |
| C(19) | 5134(2) | 34(2)    | 1838(1) | 24(1) |
| C(20) | 4344(2) | 340(2)   | 1621(1) | 22(1) |
| C(32) | 1282(2) | 2040(3)  | 2287(2) | 42(1) |
| C(1)  | 2491(2) | -1460(2) | 1055(1) | 21(1) |
| N(8)  | 4747(2) | 1500(3)  | 238(2)  | 62(1) |
| C(11) | 650(2)  | -3353(3) | 2000(2) | 48(1) |
| C(31) | 2096(2) | 3628(3)  | 2714(2) | 51(1) |
| C(33) | 2922(2) | 3473(2)  | 116(1)  | 31(1) |
| C(13) | 1412(2) | -1886(2) | -457(1) | 32(1) |
| C(4)  | 1104(2) | -2069(2) | 660(1)  | 24(1) |
| C(3)  | 2326(2) | -3220(2) | 979(1)  | 29(1) |
| C(35) | 2552(2) | 3014(3)  | -529(1) | 39(1) |
| C(41) | 5582(2) | 3204(3)  | 247(2)  | 58(1) |
| C(14) | 1381(3) | -2946(3) | -792(2) | 60(1) |
| B(1)  | 4624(2) | 407(3)   | 3372(2) | 31(1) |
| B(2)  | 6950(2) | 1946(3)  | 2009(2) | 32(1) |

---

Table 3. Bond lengths [ $\text{\AA}$ ] and angles [ $^\circ$ ] for 7.

---

|             |            |
|-------------|------------|
| V(1)-O(1)   | 1.5913(19) |
| V(1)-N(6)   | 2.087(2)   |
| V(1)-N(7)   | 2.091(2)   |
| V(1)-C(1)   | 2.129(3)   |
| V(1)-C(21)  | 2.136(3)   |
| V(1)-N(3)   | 2.236(2)   |
| F(4)-B(1)   | 1.354(4)   |
| F(3)-B(1)   | 1.397(4)   |
| F(8)-B(2)   | 1.389(4)   |
| F(2)-B(1)   | 1.380(4)   |
| F(1)-B(1)   | 1.375(4)   |
| N(4)-C(21)  | 1.372(3)   |
| N(4)-C(22)  | 1.387(3)   |
| N(4)-C(20)  | 1.413(3)   |
| N(7)-C(38)  | 1.134(3)   |
| C(36)-N(6)  | 1.133(3)   |
| C(36)-C(37) | 1.454(4)   |
| C(38)-C(39) | 1.455(4)   |
| N(5)-C(21)  | 1.342(3)   |
| N(5)-C(23)  | 1.399(3)   |
| N(5)-C(24)  | 1.449(3)   |
| F(5)-B(2)   | 1.362(4)   |
| N(2)-C(1)   | 1.373(3)   |
| N(2)-C(2)   | 1.380(3)   |
| N(2)-C(16)  | 1.420(3)   |
| F(7)-B(2)   | 1.341(4)   |
| C(25)-C(26) | 1.396(4)   |
| C(25)-C(24) | 1.397(4)   |
| C(25)-C(30) | 1.518(4)   |
| F(6)-B(2)   | 1.360(4)   |
| C(26)-C(27) | 1.378(4)   |
| C(26)-H(26) | 0.9500     |
| C(40)-N(8)  | 1.138(4)   |



Electronic Supplementary Information for Dalton Transactions  
This journal is © The Royal Society of Chemistry 2005

|              |          |
|--------------|----------|
| C(40)-C(41)  | 1.442(5) |
| C(8)-C(7)    | 1.375(4) |
| C(8)-C(9)    | 1.396(4) |
| C(8)-H(8)    | 0.9500   |
| N(3)-C(16)   | 1.328(3) |
| N(3)-C(20)   | 1.329(3) |
| C(17)-C(16)  | 1.382(4) |
| C(17)-C(18)  | 1.389(4) |
| C(17)-H(17)  | 0.9500   |
| C(2)-C(3)    | 1.351(4) |
| C(2)-H(2)    | 0.9500   |
| N(1)-C(1)    | 1.339(3) |
| N(1)-C(3)    | 1.395(3) |
| N(1)-C(4)    | 1.452(3) |
| C(6)-C(7)    | 1.380(4) |
| C(6)-C(5)    | 1.396(4) |
| C(6)-H(6)    | 0.9500   |
| C(34)-C(33)  | 1.532(4) |
| C(34)-H(34A) | 0.9800   |
| C(34)-H(34B) | 0.9800   |
| C(34)-H(34C) | 0.9800   |
| C(22)-C(23)  | 1.339(4) |
| C(22)-H(22)  | 0.9500   |
| C(37)-H(37A) | 0.9800   |
| C(37)-H(37B) | 0.9800   |
| C(37)-H(37C) | 0.9800   |
| C(29)-C(28)  | 1.391(4) |
| C(29)-C(24)  | 1.402(4) |
| C(29)-C(33)  | 1.520(4) |
| C(7)-H(7)    | 0.9500   |
| C(28)-C(27)  | 1.384(4) |
| C(28)-H(28)  | 0.9500   |
| C(27)-H(27)  | 0.9500   |
| C(10)-C(9)   | 1.519(4) |
| C(10)-C(11)  | 1.524(5) |

Electronic Supplementary Information for Dalton Transactions  
This journal is © The Royal Society of Chemistry 2005

|              |          |
|--------------|----------|
| C(10)-C(12)  | 1.531(4) |
| C(10)-H(10)  | 1.0000   |
| C(23)-H(23)  | 0.9500   |
| C(5)-C(4)    | 1.397(4) |
| C(5)-C(13)   | 1.518(4) |
| C(39)-H(39A) | 0.9800   |
| C(39)-H(39B) | 0.9800   |
| C(39)-H(39C) | 0.9800   |
| C(30)-C(32)  | 1.533(4) |
| C(30)-C(31)  | 1.533(4) |
| C(30)-H(30)  | 1.0000   |
| C(9)-C(4)    | 1.395(4) |
| C(18)-C(19)  | 1.385(4) |
| C(18)-H(18)  | 0.9500   |
| C(12)-H(12A) | 0.9800   |
| C(12)-H(12B) | 0.9800   |
| C(12)-H(12C) | 0.9800   |
| C(15)-C(13)  | 1.524(4) |
| C(15)-H(15A) | 0.9800   |
| C(15)-H(15B) | 0.9800   |
| C(15)-H(15C) | 0.9800   |
| C(19)-C(20)  | 1.386(4) |
| C(19)-H(19)  | 0.9500   |
| C(32)-H(32A) | 0.9800   |
| C(32)-H(32B) | 0.9800   |
| C(32)-H(32C) | 0.9800   |
| C(11)-H(11A) | 0.9800   |
| C(11)-H(11B) | 0.9800   |
| C(11)-H(11C) | 0.9800   |
| C(31)-H(31A) | 0.9800   |
| C(31)-H(31B) | 0.9800   |
| C(31)-H(31C) | 0.9800   |
| C(33)-C(35)  | 1.535(4) |
| C(33)-H(33)  | 1.0000   |
| C(13)-C(14)  | 1.525(4) |

Electronic Supplementary Information for Dalton Transactions  
This journal is © The Royal Society of Chemistry 2005

|                  |            |
|------------------|------------|
| C(13)-H(13)      | 1.0000     |
| C(3)-H(3)        | 0.9500     |
| C(35)-H(35A)     | 0.9800     |
| C(35)-H(35B)     | 0.9800     |
| C(35)-H(35C)     | 0.9800     |
| C(41)-H(41A)     | 0.9800     |
| C(41)-H(41B)     | 0.9800     |
| C(41)-H(41C)     | 0.9800     |
| C(14)-H(14A)     | 0.9800     |
| C(14)-H(14B)     | 0.9800     |
| C(14)-H(14C)     | 0.9800     |
| O(1)-V(1)-N(6)   | 97.58(9)   |
| O(1)-V(1)-N(7)   | 100.15(9)  |
| N(6)-V(1)-N(7)   | 162.27(9)  |
| O(1)-V(1)-C(1)   | 108.46(10) |
| N(6)-V(1)-C(1)   | 86.58(9)   |
| N(7)-V(1)-C(1)   | 87.51(9)   |
| O(1)-V(1)-C(21)  | 107.91(10) |
| N(6)-V(1)-C(21)  | 87.82(9)   |
| N(7)-V(1)-C(21)  | 87.06(9)   |
| C(1)-V(1)-C(21)  | 143.63(10) |
| O(1)-V(1)-N(3)   | 177.39(9)  |
| N(6)-V(1)-N(3)   | 79.87(8)   |
| N(7)-V(1)-N(3)   | 82.40(8)   |
| C(1)-V(1)-N(3)   | 72.04(9)   |
| C(21)-V(1)-N(3)  | 71.59(9)   |
| C(21)-N(4)-C(22) | 111.5(2)   |
| C(21)-N(4)-C(20) | 118.7(2)   |
| C(22)-N(4)-C(20) | 129.9(2)   |
| C(38)-N(7)-V(1)  | 171.7(2)   |
| N(6)-C(36)-C(37) | 177.6(3)   |
| N(7)-C(38)-C(39) | 179.6(4)   |
| C(21)-N(5)-C(23) | 111.1(2)   |
| C(21)-N(5)-C(24) | 123.9(2)   |

Electronic Supplementary Information for Dalton Transactions  
This journal is © The Royal Society of Chemistry 2005

|                     |            |
|---------------------|------------|
| C(23)-N(5)-C(24)    | 124.9(2)   |
| C(1)-N(2)-C(2)      | 111.7(2)   |
| C(1)-N(2)-C(16)     | 118.9(2)   |
| C(2)-N(2)-C(16)     | 129.4(2)   |
| C(36)-N(6)-V(1)     | 175.3(2)   |
| C(26)-C(25)-C(24)   | 116.9(3)   |
| C(26)-C(25)-C(30)   | 120.1(3)   |
| C(24)-C(25)-C(30)   | 123.0(2)   |
| C(27)-C(26)-C(25)   | 121.3(3)   |
| C(27)-C(26)-H(26)   | 119.4      |
| C(25)-C(26)-H(26)   | 119.4      |
| N(8)-C(40)-C(41)    | 178.9(4)   |
| C(7)-C(8)-C(9)      | 121.4(3)   |
| C(7)-C(8)-H(8)      | 119.3      |
| C(9)-C(8)-H(8)      | 119.3      |
| C(16)-N(3)-C(20)    | 120.0(2)   |
| C(16)-N(3)-V(1)     | 119.82(16) |
| C(20)-N(3)-V(1)     | 120.10(17) |
| C(16)-C(17)-C(18)   | 115.9(3)   |
| C(16)-C(17)-H(17)   | 122.0      |
| C(18)-C(17)-H(17)   | 122.0      |
| C(3)-C(2)-N(2)      | 105.8(2)   |
| C(3)-C(2)-H(2)      | 127.1      |
| N(2)-C(2)-H(2)      | 127.1      |
| C(1)-N(1)-C(3)      | 111.2(2)   |
| C(1)-N(1)-C(4)      | 124.2(2)   |
| C(3)-N(1)-C(4)      | 124.5(2)   |
| C(7)-C(6)-C(5)      | 121.2(3)   |
| C(7)-C(6)-H(6)      | 119.4      |
| C(5)-C(6)-H(6)      | 119.4      |
| C(33)-C(34)-H(34A)  | 109.5      |
| C(33)-C(34)-H(34B)  | 109.5      |
| H(34A)-C(34)-H(34B) | 109.5      |
| C(33)-C(34)-H(34C)  | 109.5      |
| H(34A)-C(34)-H(34C) | 109.5      |

Electronic Supplementary Information for Dalton Transactions  
This journal is © The Royal Society of Chemistry 2005

|                     |            |
|---------------------|------------|
| H(34B)-C(34)-H(34C) | 109.5      |
| C(23)-C(22)-N(4)    | 106.1(2)   |
| C(23)-C(22)-H(22)   | 127.0      |
| N(4)-C(22)-H(22)    | 127.0      |
| C(36)-C(37)-H(37A)  | 109.5      |
| C(36)-C(37)-H(37B)  | 109.5      |
| H(37A)-C(37)-H(37B) | 109.5      |
| C(36)-C(37)-H(37C)  | 109.5      |
| H(37A)-C(37)-H(37C) | 109.5      |
| H(37B)-C(37)-H(37C) | 109.5      |
| C(28)-C(29)-C(24)   | 117.4(3)   |
| C(28)-C(29)-C(33)   | 120.5(2)   |
| C(24)-C(29)-C(33)   | 122.2(2)   |
| C(8)-C(7)-C(6)      | 120.3(3)   |
| C(8)-C(7)-H(7)      | 119.9      |
| C(6)-C(7)-H(7)      | 119.9      |
| C(27)-C(28)-C(29)   | 120.8(3)   |
| C(27)-C(28)-H(28)   | 119.6      |
| C(29)-C(28)-H(28)   | 119.6      |
| N(5)-C(21)-N(4)     | 104.0(2)   |
| N(5)-C(21)-V(1)     | 137.87(18) |
| N(4)-C(21)-V(1)     | 118.09(17) |
| C(26)-C(27)-C(28)   | 120.5(3)   |
| C(26)-C(27)-H(27)   | 119.8      |
| C(28)-C(27)-H(27)   | 119.8      |
| C(25)-C(24)-C(29)   | 123.1(2)   |
| C(25)-C(24)-N(5)    | 119.1(2)   |
| C(29)-C(24)-N(5)    | 117.8(2)   |
| C(9)-C(10)-C(11)    | 111.1(3)   |
| C(9)-C(10)-C(12)    | 111.0(3)   |
| C(11)-C(10)-C(12)   | 111.7(3)   |
| C(9)-C(10)-H(10)    | 107.6      |
| C(11)-C(10)-H(10)   | 107.6      |
| C(12)-C(10)-H(10)   | 107.6      |
| C(22)-C(23)-N(5)    | 107.3(2)   |

Electronic Supplementary Information for Dalton Transactions  
This journal is © The Royal Society of Chemistry 2005

|                     |          |
|---------------------|----------|
| C(22)-C(23)-H(23)   | 126.4    |
| N(5)-C(23)-H(23)    | 126.4    |
| N(3)-C(16)-C(17)    | 122.9(2) |
| N(3)-C(16)-N(2)     | 111.4(2) |
| C(17)-C(16)-N(2)    | 125.7(2) |
| C(4)-C(5)-C(6)      | 116.8(3) |
| C(4)-C(5)-C(13)     | 122.9(2) |
| C(6)-C(5)-C(13)     | 120.3(2) |
| C(38)-C(39)-H(39A)  | 109.5    |
| C(38)-C(39)-H(39B)  | 109.5    |
| H(39A)-C(39)-H(39B) | 109.5    |
| C(38)-C(39)-H(39C)  | 109.5    |
| H(39A)-C(39)-H(39C) | 109.5    |
| H(39B)-C(39)-H(39C) | 109.5    |
| C(25)-C(30)-C(32)   | 111.0(3) |
| C(25)-C(30)-C(31)   | 110.8(3) |
| C(32)-C(30)-C(31)   | 110.7(3) |
| C(25)-C(30)-H(30)   | 108.1    |
| C(32)-C(30)-H(30)   | 108.1    |
| C(31)-C(30)-H(30)   | 108.1    |
| C(4)-C(9)-C(8)      | 116.7(3) |
| C(4)-C(9)-C(10)     | 122.5(2) |
| C(8)-C(9)-C(10)     | 120.8(3) |
| C(19)-C(18)-C(17)   | 122.5(2) |
| C(19)-C(18)-H(18)   | 118.8    |
| C(17)-C(18)-H(18)   | 118.8    |
| C(10)-C(12)-H(12A)  | 109.5    |
| C(10)-C(12)-H(12B)  | 109.5    |
| H(12A)-C(12)-H(12B) | 109.5    |
| C(10)-C(12)-H(12C)  | 109.5    |
| H(12A)-C(12)-H(12C) | 109.5    |
| H(12B)-C(12)-H(12C) | 109.5    |
| C(13)-C(15)-H(15A)  | 109.5    |
| C(13)-C(15)-H(15B)  | 109.5    |
| H(15A)-C(15)-H(15B) | 109.5    |

Electronic Supplementary Information for Dalton Transactions  
This journal is © The Royal Society of Chemistry 2005

|                     |            |
|---------------------|------------|
| C(13)-C(15)-H(15C)  | 109.5      |
| H(15A)-C(15)-H(15C) | 109.5      |
| H(15B)-C(15)-H(15C) | 109.5      |
| C(18)-C(19)-C(20)   | 116.2(2)   |
| C(18)-C(19)-H(19)   | 121.9      |
| C(20)-C(19)-H(19)   | 121.9      |
| N(3)-C(20)-C(19)    | 122.5(2)   |
| N(3)-C(20)-N(4)     | 111.5(2)   |
| C(19)-C(20)-N(4)    | 126.0(2)   |
| C(30)-C(32)-H(32A)  | 109.5      |
| C(30)-C(32)-H(32B)  | 109.5      |
| H(32A)-C(32)-H(32B) | 109.5      |
| C(30)-C(32)-H(32C)  | 109.5      |
| H(32A)-C(32)-H(32C) | 109.5      |
| H(32B)-C(32)-H(32C) | 109.5      |
| N(1)-C(1)-N(2)      | 104.1(2)   |
| N(1)-C(1)-V(1)      | 138.13(18) |
| N(2)-C(1)-V(1)      | 117.77(17) |
| C(10)-C(11)-H(11A)  | 109.5      |
| C(10)-C(11)-H(11B)  | 109.5      |
| H(11A)-C(11)-H(11B) | 109.5      |
| C(10)-C(11)-H(11C)  | 109.5      |
| H(11A)-C(11)-H(11C) | 109.5      |
| H(11B)-C(11)-H(11C) | 109.5      |
| C(30)-C(31)-H(31A)  | 109.5      |
| C(30)-C(31)-H(31B)  | 109.5      |
| H(31A)-C(31)-H(31B) | 109.5      |
| C(30)-C(31)-H(31C)  | 109.5      |
| H(31A)-C(31)-H(31C) | 109.5      |
| H(31B)-C(31)-H(31C) | 109.5      |
| C(29)-C(33)-C(34)   | 110.2(2)   |
| C(29)-C(33)-C(35)   | 111.6(2)   |
| C(34)-C(33)-C(35)   | 111.2(2)   |
| C(29)-C(33)-H(33)   | 107.9      |
| C(34)-C(33)-H(33)   | 107.9      |

Electronic Supplementary Information for Dalton Transactions  
This journal is © The Royal Society of Chemistry 2005

|                     |          |
|---------------------|----------|
| C(35)-C(33)-H(33)   | 107.9    |
| C(5)-C(13)-C(14)    | 110.2(3) |
| C(5)-C(13)-C(15)    | 113.0(3) |
| C(14)-C(13)-C(15)   | 110.4(3) |
| C(5)-C(13)-H(13)    | 107.7    |
| C(14)-C(13)-H(13)   | 107.7    |
| C(15)-C(13)-H(13)   | 107.7    |
| C(9)-C(4)-C(5)      | 123.5(2) |
| C(9)-C(4)-N(1)      | 117.9(2) |
| C(5)-C(4)-N(1)      | 118.6(2) |
| C(2)-C(3)-N(1)      | 107.2(2) |
| C(2)-C(3)-H(3)      | 126.4    |
| N(1)-C(3)-H(3)      | 126.4    |
| C(33)-C(35)-H(35A)  | 109.5    |
| C(33)-C(35)-H(35B)  | 109.5    |
| H(35A)-C(35)-H(35B) | 109.5    |
| C(33)-C(35)-H(35C)  | 109.5    |
| H(35A)-C(35)-H(35C) | 109.5    |
| H(35B)-C(35)-H(35C) | 109.5    |
| C(40)-C(41)-H(41A)  | 109.5    |
| C(40)-C(41)-H(41B)  | 109.5    |
| H(41A)-C(41)-H(41B) | 109.5    |
| C(40)-C(41)-H(41C)  | 109.5    |
| H(41A)-C(41)-H(41C) | 109.5    |
| H(41B)-C(41)-H(41C) | 109.5    |
| C(13)-C(14)-H(14A)  | 109.5    |
| C(13)-C(14)-H(14B)  | 109.5    |
| H(14A)-C(14)-H(14B) | 109.5    |
| C(13)-C(14)-H(14C)  | 109.5    |
| H(14A)-C(14)-H(14C) | 109.5    |
| H(14B)-C(14)-H(14C) | 109.5    |
| F(4)-B(1)-F(1)      | 109.4(3) |
| F(4)-B(1)-F(2)      | 111.5(3) |
| F(1)-B(1)-F(2)      | 108.9(3) |
| F(4)-B(1)-F(3)      | 108.9(3) |



Electronic Supplementary Information for Dalton Transactions  
This journal is © The Royal Society of Chemistry 2005

|                |          |
|----------------|----------|
| F(1)-B(1)-F(3) | 109.6(2) |
| F(2)-B(1)-F(3) | 108.4(3) |
| F(7)-B(2)-F(6) | 110.0(3) |
| F(7)-B(2)-F(5) | 112.3(3) |
| F(6)-B(2)-F(5) | 107.8(3) |
| F(7)-B(2)-F(8) | 110.1(3) |
| F(6)-B(2)-F(8) | 105.8(3) |
| F(5)-B(2)-F(8) | 110.6(3) |

---

Symmetry transformations used to generate equivalent atoms:

Table 4. Anisotropic displacement parameters ( $\approx 2 \times 10^3$ ) for 7. The anisotropic displacement factor exponent takes the form:  $-2\pi^2 [ h^2 a^{*2} U^{11} + \dots + 2 h k a^* b^* U^{12} ]$

|       | $U^{11}$ | $U^{22}$ | $U^{33}$ | $U^{23}$ | $U^{13}$ | $U^{12}$ |
|-------|----------|----------|----------|----------|----------|----------|
| V(1)  | 20(1)    | 20(1)    | 18(1)    | 1(1)     | 2(1)     | 1(1)     |
| F(4)  | 92(2)    | 123(2)   | 32(1)    | -4(1)    | 18(1)    | 1(2)     |
| F(3)  | 32(1)    | 39(1)    | 67(1)    | -9(1)    | 9(1)     | -10(1)   |
| F(8)  | 112(2)   | 64(2)    | 51(1)    | -6(1)    | -31(1)   | 14(1)    |
| O(1)  | 26(1)    | 31(1)    | 32(1)    | 1(1)     | 1(1)     | 5(1)     |
| F(2)  | 43(1)    | 34(1)    | 106(2)   | -7(1)    | 16(1)    | -11(1)   |
| F(1)  | 46(1)    | 44(1)    | 55(1)    | 11(1)    | -3(1)    | -1(1)    |
| N(4)  | 21(1)    | 25(1)    | 20(1)    | 0(1)     | 4(1)     | -1(1)    |
| N(7)  | 32(1)    | 26(1)    | 19(1)    | 0(1)     | 4(1)     | -2(1)    |
| C(36) | 26(1)    | 26(1)    | 27(1)    | -2(1)    | 5(1)     | -2(1)    |
| C(38) | 37(2)    | 29(1)    | 23(1)    | 0(1)     | 2(1)     | -1(1)    |
| N(5)  | 24(1)    | 21(1)    | 21(1)    | 0(1)     | 5(1)     | -1(1)    |
| F(5)  | 115(2)   | 39(1)    | 85(2)    | -6(1)    | -28(2)   | 22(1)    |
| N(2)  | 24(1)    | 20(1)    | 24(1)    | -1(1)    | 1(1)     | 2(1)     |
| F(7)  | 64(2)    | 91(2)    | 110(2)   | 36(2)    | -33(2)   | -36(1)   |
| N(6)  | 23(1)    | 23(1)    | 23(1)    | 0(1)     | 3(1)     | -2(1)    |
| C(25) | 29(1)    | 24(1)    | 32(2)    | -2(1)    | 8(1)     | -2(1)    |
| F(6)  | 76(2)    | 118(2)   | 72(2)    | 13(2)    | 27(1)    | 35(2)    |
| C(26) | 29(2)    | 30(2)    | 43(2)    | -4(1)    | 9(1)     | 0(1)     |
| C(40) | 45(2)    | 49(2)    | 38(2)    | -5(2)    | 6(2)     | -5(2)    |
| C(8)  | 25(1)    | 45(2)    | 38(2)    | 2(1)     | 5(1)     | 0(1)     |
| N(3)  | 21(1)    | 23(1)    | 19(1)    | 0(1)     | 3(1)     | 0(1)     |
| C(17) | 26(1)    | 28(1)    | 25(1)    | 3(1)     | 4(1)     | 5(1)     |
| C(2)  | 31(2)    | 21(1)    | 34(2)    | -1(1)    | 1(1)     | 3(1)     |
| N(1)  | 24(1)    | 22(1)    | 23(1)    | -2(1)    | 1(1)     | 1(1)     |
| C(6)  | 35(2)    | 34(2)    | 29(2)    | 1(1)     | -5(1)    | 1(1)     |
| C(34) | 48(2)    | 44(2)    | 36(2)    | -2(1)    | 12(1)    | -11(2)   |
| C(22) | 28(1)    | 26(1)    | 21(1)    | 1(1)     | 3(1)     | -5(1)    |
| C(37) | 42(2)    | 48(2)    | 23(1)    | 1(1)     | 11(1)    | -8(2)    |
| C(29) | 31(1)    | 20(1)    | 28(1)    | -2(1)    | 2(1)     | -3(1)    |

Electronic Supplementary Information for Dalton Transactions  
This journal is © The Royal Society of Chemistry 2005

|       |       |       |       |        |       |        |
|-------|-------|-------|-------|--------|-------|--------|
| C(7)  | 24(1) | 46(2) | 41(2) | 2(1)   | -3(1) | 0(1)   |
| C(28) | 38(2) | 25(1) | 33(2) | 2(1)   | 0(1)  | 2(1)   |
| C(21) | 23(1) | 24(1) | 16(1) | 1(1)   | 5(1)  | 1(1)   |
| C(27) | 29(2) | 28(2) | 47(2) | -2(1)  | -1(1) | 5(1)   |
| C(24) | 26(1) | 18(1) | 28(1) | -1(1)  | 3(1)  | -1(1)  |
| C(10) | 28(2) | 48(2) | 28(2) | 3(1)   | 5(1)  | -1(1)  |
| C(23) | 31(1) | 25(1) | 23(1) | -1(1)  | 5(1)  | -7(1)  |
| C(16) | 21(1) | 25(1) | 19(1) | 0(1)   | 3(1)  | 0(1)   |
| C(5)  | 29(1) | 23(1) | 27(1) | -4(1)  | -1(1) | -1(1)  |
| C(39) | 59(2) | 52(2) | 27(2) | -3(1)  | 17(1) | 1(2)   |
| C(30) | 38(2) | 30(2) | 33(2) | 1(1)   | 15(1) | 1(1)   |
| C(9)  | 27(1) | 30(2) | 29(1) | 0(1)   | 1(1)  | -2(1)  |
| C(18) | 21(1) | 41(2) | 23(1) | 7(1)   | 3(1)  | 5(1)   |
| C(12) | 40(2) | 57(2) | 34(2) | -6(2)  | 10(1) | -9(2)  |
| C(15) | 54(2) | 53(2) | 36(2) | 12(2)  | 7(2)  | 4(2)   |
| C(19) | 22(1) | 31(2) | 20(1) | 3(1)   | 3(1)  | -1(1)  |
| C(20) | 26(1) | 24(1) | 16(1) | 1(1)   | 6(1)  | 0(1)   |
| C(32) | 45(2) | 38(2) | 50(2) | 6(2)   | 26(2) | 4(1)   |
| C(1)  | 22(1) | 24(1) | 16(1) | 0(1)   | 2(1)  | 1(1)   |
| N(8)  | 67(2) | 64(2) | 59(2) | -15(2) | 17(2) | -22(2) |
| C(11) | 56(2) | 52(2) | 38(2) | 11(2)  | 14(2) | 6(2)   |
| C(31) | 73(2) | 46(2) | 35(2) | -7(2)  | 11(2) | -4(2)  |
| C(33) | 38(2) | 30(2) | 25(1) | 2(1)   | 7(1)  | 2(1)   |
| C(13) | 34(2) | 36(2) | 25(1) | -3(1)  | 3(1)  | 2(1)   |
| C(4)  | 23(1) | 22(1) | 26(1) | -3(1)  | -1(1) | -1(1)  |
| C(3)  | 33(2) | 19(1) | 33(2) | -3(1)  | -1(1) | 2(1)   |
| C(35) | 51(2) | 39(2) | 28(2) | 0(1)   | 10(1) | -2(2)  |
| C(41) | 64(2) | 48(2) | 58(2) | 10(2)  | -4(2) | -13(2) |
| C(14) | 78(3) | 48(2) | 60(2) | -17(2) | 31(2) | -3(2)  |
| B(1)  | 33(2) | 30(2) | 31(2) | 0(1)   | 8(1)  | -4(1)  |
| B(2)  | 30(2) | 32(2) | 32(2) | -5(1)  | 3(1)  | -1(1)  |

---

## Structural Data for 9

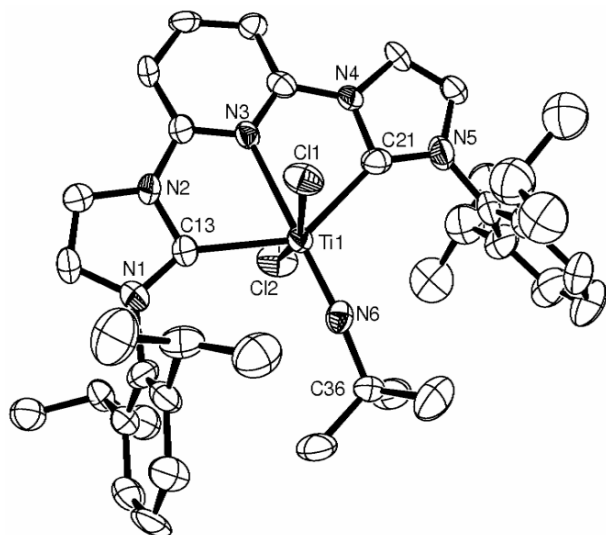

Table 1. Crystal data and structure refinement for 9.

|                                 |                                                                                  |          |
|---------------------------------|----------------------------------------------------------------------------------|----------|
| Identification code             | 05dcp024                                                                         |          |
| Empirical formula               | C <sub>39</sub> H <sub>49</sub> Cl <sub>2</sub> N <sub>6</sub> O <sub>0</sub> Ti |          |
| Formula weight                  | 720.64                                                                           |          |
| Temperature                     | 120(2) K                                                                         |          |
| Wavelength                      | 0.71073 Å                                                                        |          |
| Crystal system                  | Orthorhombic                                                                     |          |
| Space group                     | P212121                                                                          |          |
| Unit cell dimensions            | a = 10.802(9) Å                                                                  | α = 90°. |
|                                 | b = 13.630(13) Å                                                                 | β = 90°. |
|                                 | c = 32.45(2) Å                                                                   | γ = 90°. |
| Volume                          | 4778(7) Å <sup>3</sup>                                                           |          |
| Z                               | 4                                                                                |          |
| Density (calculated)            | 1.002 Mg/m <sup>3</sup>                                                          |          |
| Absorption coefficient          | 0.319 mm <sup>-1</sup>                                                           |          |
| F(000)                          | 1524                                                                             |          |
| Crystal size                    | 0.20 x 0.16 x 0.04 mm <sup>3</sup>                                               |          |
| Theta range for data collection | 2.92 to 27.49°.                                                                  |          |

Electronic Supplementary Information for Dalton Transactions  
This journal is © The Royal Society of Chemistry 2005

|                                   |                                             |
|-----------------------------------|---------------------------------------------|
| Index ranges                      | -13<=h<=14, -17<=k<=17, -41<=l<=41          |
| Reflections collected             | 33304                                       |
| Independent reflections           | 10871 [R(int) = 0.1118]                     |
| Completeness to theta = 27.49°    | 99.4 %                                      |
| Absorption correction             | Semi-empirical from equivalents             |
| Max. and min. transmission        | 0.9873 and 0.9389                           |
| Refinement method                 | Full-matrix least-squares on F <sup>2</sup> |
| Data / restraints / parameters    | 10871 / 122 / 477                           |
| Goodness-of-fit on F <sup>2</sup> | 0.973                                       |
| Final R indices [I>2sigma(I)]     | R1 = 0.0944, wR2 = 0.1944                   |
| R indices (all data)              | R1 = 0.1728, wR2 = 0.2221                   |
| Absolute structure parameter      | 0.15(5)                                     |
| Largest diff. peak and hole       | 0.414 and -0.310 e.Å <sup>-3</sup>          |

Table 2. Atomic coordinates ( $\times 10^4$ ) and equivalent isotropic displacement parameters ( $\text{\AA}^2 \times 10^3$ ) for **9**.  $U(\text{eq})$  is defined as one third of the trace of the orthogonalized  $U^{ij}$  tensor.

|       | x        | y        | z       | U(eq) |
|-------|----------|----------|---------|-------|
| Ti(1) | 7673(1)  | 8761(1)  | 8237(1) | 27(1) |
| Cl(2) | 6297(2)  | 7430(1)  | 8059(1) | 49(1) |
| Cl(1) | 9266(1)  | 10018(1) | 8186(1) | 43(1) |
| C(7)  | 3174(6)  | 9585(5)  | 7781(2) | 39(2) |
| N(4)  | 9676(4)  | 7295(3)  | 7885(1) | 28(1) |
| N(3)  | 8391(4)  | 8399(3)  | 7576(1) | 28(1) |
| N(5)  | 9828(5)  | 7008(4)  | 8530(2) | 40(1) |
| N(2)  | 6983(4)  | 9540(4)  | 7364(1) | 35(1) |
| C(3)  | 2894(6)  | 10738(5) | 8377(2) | 50(2) |
| C(19) | 9629(5)  | 7433(4)  | 7125(2) | 31(1) |
| C(2)  | 3657(6)  | 10326(4) | 8077(2) | 39(2) |
| C(22) | 10564(5) | 6554(4)  | 7926(2) | 35(2) |
| C(9)  | 2657(7)  | 8682(5)  | 8005(2) | 55(2) |
| C(6)  | 5349(5)  | 11423(5) | 8324(2) | 42(2) |
| N(1)  | 5692(5)  | 10338(3) | 7729(1) | 38(1) |
| C(5)  | 4550(6)  | 11794(5) | 8615(2) | 49(2) |
| C(36) | 6377(5)  | 8899(4)  | 9099(2) | 38(2) |
| C(8)  | 2196(6)  | 10049(5) | 7499(2) | 51(2) |
| N(6)  | 7102(4)  | 8931(3)  | 8712(1) | 34(1) |
| C(14) | 5507(6)  | 10630(5) | 7321(2) | 46(2) |
| C(1)  | 4878(6)  | 10701(5) | 8062(2) | 38(2) |
| C(12) | 7353(8)  | 11872(6) | 8678(2) | 70(2) |
| C(17) | 8233(5)  | 8615(5)  | 6852(2) | 39(2) |
| C(4)  | 3321(6)  | 11442(5) | 8650(2) | 53(2) |
| C(20) | 9239(5)  | 7721(4)  | 7515(2) | 31(1) |
| C(23) | 10665(5) | 6386(5)  | 8326(2) | 41(2) |
| C(24) | 9533(6)  | 6925(5)  | 8962(2) | 46(2) |
| C(10) | 6620(6)  | 11834(5) | 8280(2) | 46(2) |
| C(16) | 7897(5)  | 8842(5)  | 7254(2) | 34(1) |
| C(13) | 6580(5)  | 9656(4)  | 7767(2) | 34(1) |

Electronic Supplementary Information for Dalton Transactions  
This journal is © The Royal Society of Chemistry 2005

|        |           |          |          |       |
|--------|-----------|----------|----------|-------|
| C(25)  | 8820(7)   | 6136(5)  | 9097(2)  | 52(2) |
| C(21)  | 9182(5)   | 7587(4)  | 8266(2)  | 35(1) |
| C(33A) | 10892(7)  | 8480(6)  | 9087(3)  | 77(2) |
| C(35A) | 12157(13) | 7895(14) | 9091(6)  | 78(3) |
| C(34A) | 11090(20) | 9302(12) | 9396(5)  | 85(4) |
| C(33B) | 10892(7)  | 8480(6)  | 9087(3)  | 77(2) |
| C(35B) | 12209(10) | 8696(13) | 9226(4)  | 78(3) |
| C(34B) | 10255(16) | 9468(9)  | 9226(5)  | 85(4) |
| C(28)  | 9873(8)   | 7416(8)  | 9658(2)  | 86(3) |
| C(15)  | 6326(6)   | 10153(5) | 7093(2)  | 49(2) |
| C(27)  | 9186(9)   | 6624(7)  | 9782(2)  | 80(3) |
| C(29)  | 10090(6)  | 7616(6)  | 9240(2)  | 56(2) |
| C(26)  | 8667(8)   | 6018(6)  | 9508(2)  | 69(2) |
| C(30A) | 8280(7)   | 5398(6)  | 8790(3)  | 71(2) |
| C(31A) | 6868(12)  | 5260(40) | 8807(11) | 93(4) |
| C(32A) | 8780(20)  | 4382(9)  | 8687(9)  | 68(3) |
| C(30B) | 8280(7)   | 5398(6)  | 8790(3)  | 71(2) |
| C(31B) | 6902(11)  | 5280(40) | 8893(9)  | 93(4) |
| C(32B) | 9031(15)  | 4446(10) | 8881(8)  | 68(3) |
| C(11)  | 6562(8)   | 12810(6) | 8051(2)  | 79(3) |
| C(18)  | 9083(5)   | 7905(5)  | 6796(2)  | 37(2) |
| C(37A) | 5277(8)   | 9602(7)  | 9080(3)  | 53(2) |
| C(39A) | 5938(9)   | 7828(6)  | 9162(3)  | 56(3) |
| C(38A) | 7215(10)  | 9186(9)  | 9465(2)  | 67(3) |
| C(37B) | 5029(11)  | 8790(20) | 8950(6)  | 53(2) |
| C(39B) | 7000(20)  | 8192(17) | 9406(6)  | 56(3) |
| C(38B) | 6530(30)  | 9865(13) | 9336(7)  | 67(3) |

---

Table 3. Bond lengths [Å] and angles [°] for **9**

|             |          |              |           |
|-------------|----------|--------------|-----------|
| Ti(1)-N(6)  | 1.677(5) | C(6)-C(5)    | 1.376(8)  |
| Ti(1)-C(13) | 2.281(6) | C(6)-C(1)    | 1.397(8)  |
| Ti(1)-C(21) | 2.286(6) | C(6)-C(10)   | 1.490(8)  |
| Ti(1)-N(3)  | 2.332(5) | N(1)-C(13)   | 1.342(7)  |
| Ti(1)-Cl(2) | 2.415(2) | N(1)-C(14)   | 1.396(7)  |
| Ti(1)-Cl(1) | 2.433(2) | N(1)-C(1)    | 1.477(7)  |
| C(7)-C(2)   | 1.486(9) | C(5)-C(4)    | 1.416(9)  |
| C(7)-C(9)   | 1.535(9) | C(5)-H(5)    | 0.9500    |
| C(7)-C(8)   | 1.536(8) | C(36)-N(6)   | 1.481(7)  |
| C(7)-H(7)   | 1.0000   | C(36)-C(37A) | 1.528(7)  |
| N(4)-C(22)  | 1.398(7) | C(36)-C(38B) | 1.534(10) |
| N(4)-C(21)  | 1.406(7) | C(36)-C(39B) | 1.540(10) |
| N(4)-C(20)  | 1.416(7) | C(36)-C(37B) | 1.541(10) |
| N(3)-C(20)  | 1.316(7) | C(36)-C(38A) | 1.543(8)  |
| N(3)-C(16)  | 1.320(7) | C(36)-C(39A) | 1.547(8)  |
| N(5)-C(21)  | 1.356(7) | C(8)-H(8A)   | 0.9800    |
| N(5)-C(23)  | 1.403(7) | C(8)-H(8B)   | 0.9800    |
| N(5)-C(24)  | 1.444(8) | C(8)-H(8C)   | 0.9800    |
| N(2)-C(13)  | 1.389(7) | C(14)-C(15)  | 1.324(9)  |
| N(2)-C(15)  | 1.405(7) | C(14)-H(14)  | 0.9500    |
| N(2)-C(16)  | 1.416(7) | C(12)-C(10)  | 1.516(10) |
| C(3)-C(4)   | 1.385(9) | C(12)-H(12A) | 0.9800    |
| C(3)-C(2)   | 1.394(9) | C(12)-H(12B) | 0.9800    |
| C(3)-H(3)   | 0.9500   | C(12)-H(12C) | 0.9800    |
| C(19)-C(18) | 1.379(8) | C(17)-C(18)  | 1.347(8)  |
| C(19)-C(20) | 1.390(7) | C(17)-C(16)  | 1.388(8)  |
| C(19)-H(19) | 0.9500   | C(17)-H(17)  | 0.9500    |
| C(2)-C(1)   | 1.416(9) | C(4)-H(4)    | 0.9500    |
| C(22)-C(23) | 1.323(7) | C(23)-H(23)  | 0.9500    |
| C(22)-H(22) | 0.9500   | C(24)-C(25)  | 1.394(9)  |
| C(9)-H(9A)  | 0.9800   | C(24)-C(29)  | 1.435(10) |
| C(9)-H(9B)  | 0.9800   | C(10)-C(11)  | 1.525(9)  |
| C(9)-H(9C)  | 0.9800   | C(10)-H(10)  | 1.0000    |



Electronic Supplementary Information for Dalton Transactions  
This journal is © The Royal Society of Chemistry 2005

|                   |           |                  |           |
|-------------------|-----------|------------------|-----------|
| C(25)-C(26)       | 1.355(9)  | C(32A)-H(32A)    | 0.9800    |
| C(25)-C(30A)      | 1.530(10) | C(32A)-H(32B)    | 0.9800    |
| C(33A)-C(34A)     | 1.520(9)  | C(32A)-H(32C)    | 0.9800    |
| C(33A)-C(29)      | 1.544(11) | C(31B)-H(31D)    | 0.9800    |
| C(33A)-C(35A)     | 1.581(9)  | C(31B)-H(31E)    | 0.9800    |
| C(33A)-H(33A)     | 1.0000    | C(31B)-H(31F)    | 0.9800    |
| C(35A)-H(35A)     | 0.9800    | C(32B)-H(32D)    | 0.9800    |
| C(35A)-H(35B)     | 0.9800    | C(32B)-H(32E)    | 0.9800    |
| C(35A)-H(35C)     | 0.9800    | C(32B)-H(32F)    | 0.9800    |
| C(34A)-H(34A)     | 0.9800    | C(11)-H(11A)     | 0.9800    |
| C(34A)-H(34B)     | 0.9800    | C(11)-H(11B)     | 0.9800    |
| C(34A)-H(34C)     | 0.9800    | C(11)-H(11C)     | 0.9800    |
| C(35B)-H(35D)     | 0.9800    | C(18)-H(18)      | 0.9500    |
| C(35B)-H(35E)     | 0.9800    | C(37A)-H(37A)    | 0.9800    |
| C(35B)-H(35F)     | 0.9800    | C(37A)-H(37B)    | 0.9800    |
| C(34B)-H(34D)     | 0.9800    | C(37A)-H(37C)    | 0.9800    |
| C(34B)-H(34E)     | 0.9800    | C(39A)-H(39A)    | 0.9800    |
| C(34B)-H(34F)     | 0.9800    | C(39A)-H(39B)    | 0.9800    |
| C(28)-C(27)       | 1.370(12) | C(39A)-H(39C)    | 0.9800    |
| C(28)-C(29)       | 1.404(9)  | C(38A)-H(38A)    | 0.9800    |
| C(28)-H(28)       | 0.9500    | C(38A)-H(38B)    | 0.9800    |
| C(15)-H(15)       | 0.9500    | C(38A)-H(38C)    | 0.9800    |
| C(27)-C(26)       | 1.336(11) | C(37B)-H(37D)    | 0.9800    |
| C(27)-H(27)       | 0.9500    | C(37B)-H(37E)    | 0.9800    |
| C(26)-H(26)       | 0.9500    | C(37B)-H(37F)    | 0.9800    |
| C(30A)-C(32A)     | 1.523(9)  | C(39B)-H(39D)    | 0.9800    |
| C(30A)-C(31A)     | 1.538(10) | C(39B)-H(39E)    | 0.9800    |
| C(30A)-H(30A)     | 1.0000    | C(39B)-H(39F)    | 0.9800    |
| C(31A)-H(31A)     | 0.9800    | C(38B)-H(38D)    | 0.9800    |
| C(31A)-H(31B)     | 0.9800    | C(38B)-H(38E)    | 0.9800    |
| C(31A)-H(31C)     | 0.9800    | C(38B)-H(38F)    | 0.9800    |
| N(6)-Ti(1)-C(13)  | 110.5(2)  | N(6)-Ti(1)-N(3)  | 175.3(2)  |
| N(6)-Ti(1)-C(21)  | 108.7(2)  | C(13)-Ti(1)-N(3) | 70.82(19) |
| C(13)-Ti(1)-C(21) | 140.5(2)  | C(21)-Ti(1)-N(3) | 69.77(18) |

Electronic Supplementary Information for Dalton Transactions  
This journal is © The Royal Society of Chemistry 2005

|                   |            |                     |           |
|-------------------|------------|---------------------|-----------|
| N(6)-Ti(1)-Cl(2)  | 95.56(17)  | C(1)-C(2)-C(7)      | 123.3(6)  |
| C(13)-Ti(1)-Cl(2) | 85.62(17)  | C(23)-C(22)-N(4)    | 106.0(5)  |
| C(21)-Ti(1)-Cl(2) | 85.59(17)  | C(23)-C(22)-H(22)   | 127.0     |
| N(3)-Ti(1)-Cl(2)  | 79.99(12)  | N(4)-C(22)-H(22)    | 127.0     |
| N(6)-Ti(1)-Cl(1)  | 102.99(17) | C(7)-C(9)-H(9A)     | 109.5     |
| C(13)-Ti(1)-Cl(1) | 86.82(17)  | C(7)-C(9)-H(9B)     | 109.5     |
| C(21)-Ti(1)-Cl(1) | 89.53(16)  | H(9A)-C(9)-H(9B)    | 109.5     |
| N(3)-Ti(1)-Cl(1)  | 81.49(12)  | C(7)-C(9)-H(9C)     | 109.5     |
| Cl(2)-Ti(1)-Cl(1) | 161.42(7)  | H(9A)-C(9)-H(9C)    | 109.5     |
| C(2)-C(7)-C(9)    | 111.5(5)   | H(9B)-C(9)-H(9C)    | 109.5     |
| C(2)-C(7)-C(8)    | 110.3(5)   | C(5)-C(6)-C(1)      | 116.7(6)  |
| C(9)-C(7)-C(8)    | 111.2(6)   | C(5)-C(6)-C(10)     | 120.4(6)  |
| C(2)-C(7)-H(7)    | 107.9      | C(1)-C(6)-C(10)     | 122.8(6)  |
| C(9)-C(7)-H(7)    | 107.9      | C(13)-N(1)-C(14)    | 112.8(5)  |
| C(8)-C(7)-H(7)    | 107.9      | C(13)-N(1)-C(1)     | 126.1(5)  |
| C(22)-N(4)-C(21)  | 112.4(5)   | C(14)-N(1)-C(1)     | 120.8(5)  |
| C(22)-N(4)-C(20)  | 127.4(5)   | C(6)-C(5)-C(4)      | 121.2(6)  |
| C(21)-N(4)-C(20)  | 120.2(5)   | C(6)-C(5)-H(5)      | 119.4     |
| C(20)-N(3)-C(16)  | 118.9(5)   | C(4)-C(5)-H(5)      | 119.4     |
| C(20)-N(3)-Ti(1)  | 121.2(4)   | N(6)-C(36)-C(37A)   | 110.9(5)  |
| C(16)-N(3)-Ti(1)  | 119.8(4)   | N(6)-C(36)-C(38B)   | 110.0(11) |
| C(21)-N(5)-C(23)  | 112.8(5)   | C(37A)-C(36)-C(38B) | 64.4(12)  |
| C(21)-N(5)-C(24)  | 123.0(5)   | N(6)-C(36)-C(39B)   | 109.6(10) |
| C(23)-N(5)-C(24)  | 123.5(5)   | C(37A)-C(36)-C(39B) | 139.4(11) |
| C(13)-N(2)-C(15)  | 111.3(5)   | C(38B)-C(36)-C(39B) | 99.5(15)  |
| C(13)-N(2)-C(16)  | 122.2(5)   | N(6)-C(36)-C(37B)   | 103.7(9)  |
| C(15)-N(2)-C(16)  | 126.4(5)   | C(37A)-C(36)-C(37B) | 46.8(10)  |
| C(4)-C(3)-C(2)    | 121.9(7)   | C(38B)-C(36)-C(37B) | 110.3(16) |
| C(4)-C(3)-H(3)    | 119.0      | C(39B)-C(36)-C(37B) | 123.6(15) |
| C(2)-C(3)-H(3)    | 119.0      | N(6)-C(36)-C(38A)   | 109.6(6)  |
| C(18)-C(19)-C(20) | 116.2(5)   | C(37A)-C(36)-C(38A) | 109.2(7)  |
| C(18)-C(19)-H(19) | 121.9      | C(38B)-C(36)-C(38A) | 48.1(11)  |
| C(20)-C(19)-H(19) | 121.9      | C(39B)-C(36)-C(38A) | 53.5(11)  |
| C(3)-C(2)-C(1)    | 115.5(6)   | C(37B)-C(36)-C(38A) | 145.1(10) |
| C(3)-C(2)-C(7)    | 121.1(6)   | N(6)-C(36)-C(39A)   | 107.5(5)  |

Electronic Supplementary Information for Dalton Transactions  
This journal is © The Royal Society of Chemistry 2005

|                     |           |                      |           |
|---------------------|-----------|----------------------|-----------|
| C(37A)-C(36)-C(39A) | 111.0(6)  | N(5)-C(23)-H(23)     | 126.2     |
| C(38B)-C(36)-C(39A) | 141.0(11) | C(25)-C(24)-C(29)    | 122.8(6)  |
| C(39B)-C(36)-C(39A) | 57.3(11)  | C(25)-C(24)-N(5)     | 119.2(6)  |
| C(37B)-C(36)-C(39A) | 70.0(11)  | C(29)-C(24)-N(5)     | 117.8(6)  |
| C(38A)-C(36)-C(39A) | 108.5(7)  | C(6)-C(10)-C(12)     | 114.4(6)  |
| C(7)-C(8)-H(8A)     | 109.5     | C(6)-C(10)-C(11)     | 109.7(6)  |
| C(7)-C(8)-H(8B)     | 109.5     | C(12)-C(10)-C(11)    | 114.0(6)  |
| H(8A)-C(8)-H(8B)    | 109.5     | C(6)-C(10)-H(10)     | 106.0     |
| C(7)-C(8)-H(8C)     | 109.5     | C(12)-C(10)-H(10)    | 106.0     |
| H(8A)-C(8)-H(8C)    | 109.5     | C(11)-C(10)-H(10)    | 106.0     |
| H(8B)-C(8)-H(8C)    | 109.5     | N(3)-C(16)-C(17)     | 122.5(5)  |
| C(36)-N(6)-Ti(1)    | 166.1(4)  | N(3)-C(16)-N(2)      | 112.9(5)  |
| C(15)-C(14)-N(1)    | 107.1(6)  | C(17)-C(16)-N(2)     | 124.6(5)  |
| C(15)-C(14)-H(14)   | 126.4     | N(1)-C(13)-N(2)      | 102.4(5)  |
| N(1)-C(14)-H(14)    | 126.4     | N(1)-C(13)-Ti(1)     | 143.4(4)  |
| C(6)-C(1)-C(2)      | 124.9(6)  | N(2)-C(13)-Ti(1)     | 114.0(4)  |
| C(6)-C(1)-N(1)      | 117.7(6)  | C(26)-C(25)-C(24)    | 117.9(7)  |
| C(2)-C(1)-N(1)      | 117.3(5)  | C(26)-C(25)-C(30A)   | 121.1(7)  |
| C(10)-C(12)-H(12A)  | 109.5     | C(24)-C(25)-C(30A)   | 120.9(6)  |
| C(10)-C(12)-H(12B)  | 109.5     | N(5)-C(21)-N(4)      | 101.2(5)  |
| H(12A)-C(12)-H(12B) | 109.5     | N(5)-C(21)-Ti(1)     | 143.2(4)  |
| C(10)-C(12)-H(12C)  | 109.5     | N(4)-C(21)-Ti(1)     | 115.6(4)  |
| H(12A)-C(12)-H(12C) | 109.5     | C(34A)-C(33A)-C(29)  | 115.5(10) |
| H(12B)-C(12)-H(12C) | 109.5     | C(34A)-C(33A)-C(35A) | 104.2(12) |
| C(18)-C(17)-C(16)   | 117.6(5)  | C(29)-C(33A)-C(35A)  | 95.6(9)   |
| C(18)-C(17)-H(17)   | 121.2     | C(34A)-C(33A)-H(33A) | 113.3     |
| C(16)-C(17)-H(17)   | 121.2     | C(29)-C(33A)-H(33A)  | 113.3     |
| C(3)-C(4)-C(5)      | 119.7(6)  | C(35A)-C(33A)-H(33A) | 113.3     |
| C(3)-C(4)-H(4)      | 120.1     | H(35D)-C(35B)-H(35E) | 109.5     |
| C(5)-C(4)-H(4)      | 120.1     | H(35D)-C(35B)-H(35F) | 109.5     |
| N(3)-C(20)-C(19)    | 123.2(5)  | H(35E)-C(35B)-H(35F) | 109.5     |
| N(3)-C(20)-N(4)     | 113.2(5)  | H(34D)-C(34B)-H(34E) | 109.5     |
| C(19)-C(20)-N(4)    | 123.6(5)  | H(34D)-C(34B)-H(34F) | 109.5     |
| C(22)-C(23)-N(5)    | 107.7(5)  | H(34E)-C(34B)-H(34F) | 109.5     |
| C(22)-C(23)-H(23)   | 126.2     | C(27)-C(28)-C(29)    | 121.7(9)  |

Electronic Supplementary Information for Dalton Transactions  
This journal is © The Royal Society of Chemistry 2005

|                      |           |                     |       |
|----------------------|-----------|---------------------|-------|
| C(27)-C(28)-H(28)    | 119.1     | C(36)-C(38A)-H(38A) | 109.5 |
| C(29)-C(28)-H(28)    | 119.1     | C(36)-C(38A)-H(38B) | 109.5 |
| C(14)-C(15)-N(2)     | 106.3(6)  | C(36)-C(38A)-H(38C) | 109.5 |
| C(14)-C(15)-H(15)    | 126.9     | C(36)-C(37B)-H(37D) | 109.5 |
| N(2)-C(15)-H(15)     | 126.9     | C(36)-C(37B)-H(37E) | 109.5 |
| C(26)-C(27)-C(28)    | 121.3(7)  | C(36)-C(37B)-H(37F) | 109.5 |
| C(26)-C(27)-H(27)    | 119.3     | C(36)-C(39B)-H(39D) | 109.5 |
| C(28)-C(27)-H(27)    | 119.3     | C(36)-C(39B)-H(39E) | 109.5 |
| C(28)-C(29)-C(24)    | 114.2(8)  | C(36)-C(39B)-H(39F) | 109.5 |
| C(28)-C(29)-C(33A)   | 123.5(8)  | C(36)-C(38B)-H(38D) | 109.5 |
| C(24)-C(29)-C(33A)   | 122.3(6)  | C(36)-C(38B)-H(38E) | 109.5 |
| C(27)-C(26)-C(25)    | 122.0(8)  | C(36)-C(38B)-H(38F) | 109.5 |
| C(27)-C(26)-H(26)    | 119.0     |                     |       |
| C(25)-C(26)-H(26)    | 119.0     |                     |       |
| C(32A)-C(30A)-C(25)  | 127.3(13) |                     |       |
| C(32A)-C(30A)-C(31A) | 104(3)    |                     |       |
| C(25)-C(30A)-C(31A)  | 116(2)    |                     |       |
| C(32A)-C(30A)-H(30A) | 101.8     |                     |       |
| C(25)-C(30A)-H(30A)  | 101.8     |                     |       |
| C(31A)-C(30A)-H(30A) | 101.8     |                     |       |
| C(10)-C(11)-H(11A)   | 109.5     |                     |       |
| C(10)-C(11)-H(11B)   | 109.5     |                     |       |
| H(11A)-C(11)-H(11B)  | 109.5     |                     |       |
| C(10)-C(11)-H(11C)   | 109.5     |                     |       |
| H(11A)-C(11)-H(11C)  | 109.5     |                     |       |
| H(11B)-C(11)-H(11C)  | 109.5     |                     |       |
| C(17)-C(18)-C(19)    | 121.6(5)  |                     |       |
| C(17)-C(18)-H(18)    | 119.2     |                     |       |
| C(19)-C(18)-H(18)    | 119.2     |                     |       |
| C(36)-C(37A)-H(37A)  | 109.5     |                     |       |
| C(36)-C(37A)-H(37B)  | 109.5     |                     |       |
| C(36)-C(37A)-H(37C)  | 109.5     |                     |       |
| C(36)-C(39A)-H(39A)  | 109.5     |                     |       |
| C(36)-C(39A)-H(39B)  | 109.5     |                     |       |
| C(36)-C(39A)-H(39C)  | 109.5     |                     |       |

Electronic Supplementary Information for Dalton Transactions  
This journal is © The Royal Society of Chemistry 2005

---

Symmetry transformations used to generate equivalent atoms:

Table 4. Anisotropic displacement parameters ( $\text{\AA}^2 \times 10^3$ ) for **9**. The anisotropic displacement factor exponent takes the form:  $-2\pi^2 [ h^2 a^{*2} U^{11} + \dots + 2 h k a^* b^* U^{12} ]$

|       | $U^{11}$ | $U^{22}$ | $U^{33}$ | $U^{23}$ | $U^{13}$ | $U^{12}$ |
|-------|----------|----------|----------|----------|----------|----------|
| Ti(1) | 23(1)    | 29(1)    | 29(1)    | 1(1)     | 0(1)     | 0(1)     |
| Cl(2) | 39(1)    | 45(1)    | 64(1)    | -15(1)   | 6(1)     | -17(1)   |
| Cl(1) | 31(1)    | 38(1)    | 60(1)    | -1(1)    | 9(1)     | -6(1)    |
| C(7)  | 30(4)    | 45(4)    | 43(4)    | 3(3)     | -6(3)    | 6(3)     |
| N(4)  | 19(3)    | 33(3)    | 31(3)    | 2(2)     | 0(2)     | -1(2)    |
| N(3)  | 24(3)    | 32(3)    | 27(2)    | -3(2)    | -5(2)    | 2(2)     |
| N(5)  | 40(3)    | 41(3)    | 40(3)    | 2(3)     | -8(2)    | 11(3)    |
| N(2)  | 35(3)    | 41(3)    | 30(3)    | 14(2)    | -1(2)    | 6(3)     |
| C(3)  | 27(4)    | 71(5)    | 51(4)    | -4(4)    | -8(3)    | 10(3)    |
| C(19) | 34(4)    | 30(3)    | 28(3)    | -8(3)    | 3(3)     | 2(3)     |
| C(2)  | 39(4)    | 39(4)    | 38(3)    | 5(3)     | 5(3)     | 13(3)    |
| C(22) | 23(3)    | 37(3)    | 45(4)    | 1(3)     | -5(3)    | 10(3)    |
| C(9)  | 51(4)    | 58(4)    | 56(4)    | -3(4)    | 1(4)     | 5(4)     |
| C(6)  | 29(3)    | 51(4)    | 44(4)    | -6(3)    | -3(3)    | 14(3)    |
| N(1)  | 34(3)    | 38(3)    | 40(3)    | 0(2)     | 0(2)     | 11(3)    |
| C(5)  | 38(4)    | 55(4)    | 54(4)    | -15(4)   | 0(3)     | 2(4)     |
| C(36) | 37(4)    | 43(4)    | 34(3)    | -2(3)    | 8(3)     | 11(3)    |
| C(8)  | 48(4)    | 54(4)    | 50(4)    | -7(4)    | 3(3)     | 5(4)     |
| N(6)  | 36(3)    | 33(3)    | 32(2)    | 5(2)     | -3(2)    | -3(2)    |
| C(14) | 41(4)    | 55(4)    | 41(4)    | 18(3)    | -6(3)    | 13(4)    |
| C(1)  | 50(4)    | 35(3)    | 29(3)    | 3(3)     | 11(3)    | 6(3)     |
| C(12) | 66(6)    | 79(6)    | 66(5)    | 1(4)     | 10(5)    | -13(5)   |
| C(17) | 30(3)    | 54(4)    | 34(3)    | 15(3)    | -5(3)    | 10(3)    |
| C(4)  | 39(4)    | 54(5)    | 64(4)    | -21(4)   | 3(3)     | 27(4)    |
| C(20) | 23(3)    | 26(3)    | 45(4)    | 5(3)     | 5(3)     | -3(3)    |
| C(23) | 30(3)    | 47(4)    | 45(4)    | 13(3)    | 3(3)     | 14(3)    |
| C(24) | 38(4)    | 62(5)    | 39(4)    | 3(4)     | -11(3)   | 18(4)    |
| C(10) | 45(4)    | 42(4)    | 52(4)    | -7(3)    | 17(4)    | -10(3)   |
| C(16) | 28(3)    | 45(4)    | 28(3)    | 3(3)     | -3(3)    | 1(3)     |
| C(13) | 30(4)    | 41(4)    | 30(3)    | 2(3)     | -5(3)    | 3(3)     |

Electronic Supplementary Information for Dalton Transactions  
This journal is © The Royal Society of Chemistry 2005

|        |        |         |       |        |        |        |
|--------|--------|---------|-------|--------|--------|--------|
| C(25)  | 76(5)  | 35(4)   | 46(4) | 18(3)  | 13(4)  | 19(4)  |
| C(21)  | 27(3)  | 45(4)   | 33(3) | -5(3)  | 4(3)   | -5(3)  |
| C(33A) | 77(2)  | 77(2)   | 77(2) | 0(1)   | 0(1)   | -1(1)  |
| C(35A) | 78(4)  | 78(4)   | 78(3) | 0(1)   | 0(1)   | 0(1)   |
| C(34A) | 85(4)  | 85(4)   | 85(4) | 0(1)   | 0(1)   | 0(1)   |
| C(33B) | 77(2)  | 77(2)   | 77(2) | 0(1)   | 0(1)   | -1(1)  |
| C(35B) | 78(4)  | 78(4)   | 78(3) | 0(1)   | 0(1)   | 0(1)   |
| C(34B) | 85(4)  | 85(4)   | 85(4) | 0(1)   | 0(1)   | 0(1)   |
| C(28)  | 66(6)  | 158(10) | 35(4) | 4(6)   | -14(4) | 20(7)  |
| C(15)  | 43(4)  | 60(5)   | 42(4) | 16(4)  | 13(3)  | 16(4)  |
| C(27)  | 107(8) | 89(7)   | 46(5) | 48(5)  | 10(5)  | 5(6)   |
| C(29)  | 33(4)  | 95(6)   | 41(4) | -2(4)  | -5(3)  | 9(4)   |
| C(26)  | 104(7) | 54(5)   | 50(5) | 12(4)  | 12(5)  | 26(5)  |
| C(30A) | 71(2)  | 71(2)   | 71(2) | 0(1)   | 1(1)   | 0(1)   |
| C(31A) | 93(4)  | 93(4)   | 93(4) | 0(1)   | 0(1)   | 0(1)   |
| C(32A) | 68(4)  | 68(3)   | 68(4) | 0(1)   | 0(1)   | 0(1)   |
| C(30B) | 71(2)  | 71(2)   | 71(2) | 0(1)   | 1(1)   | 0(1)   |
| C(31B) | 93(4)  | 93(4)   | 93(4) | 0(1)   | 0(1)   | 0(1)   |
| C(32B) | 68(4)  | 68(3)   | 68(4) | 0(1)   | 0(1)   | 0(1)   |
| C(11)  | 99(7)  | 64(5)   | 74(5) | 13(5)  | -2(5)  | -14(5) |
| C(18)  | 27(3)  | 57(4)   | 28(3) | -11(3) | 9(3)   | -1(3)  |
| C(37A) | 53(4)  | 56(4)   | 49(4) | 7(4)   | 27(4)  | 6(4)   |
| C(39A) | 63(5)  | 53(5)   | 53(5) | 5(4)   | 23(4)  | 4(4)   |
| C(38A) | 78(7)  | 81(7)   | 40(5) | -4(5)  | -2(5)  | -15(5) |
| C(37B) | 53(4)  | 56(4)   | 49(4) | 7(4)   | 27(4)  | 6(4)   |
| C(39B) | 63(5)  | 53(5)   | 53(5) | 5(4)   | 23(4)  | 4(4)   |
| C(38B) | 78(7)  | 81(7)   | 40(5) | -4(5)  | -2(5)  | -15(5) |

---

### Structural Data for [(C-N-C)TiCl<sub>3</sub>]

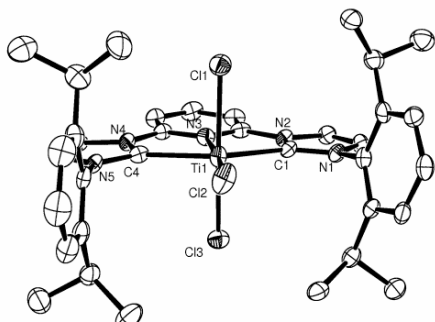

Supplement: b512133g.pdf [file b512133g.pdf]
